# Supplementary material for: Effective genome editing and identification of a regiospecific gallic acid 4-O-glycosyltransferase in pomegranate (Punica granatum L.)
Source: PubMed Central journal article supplement (PMC6838055; doi:10.1038/s41438-019-0206-7), 2019-11-08
Supplement: 41438_2019_206_MOESM2_ESM.pdf [file 41438_2019_206_MOESM2_ESM.pdf]

|             |   |                                                           |
|-------------|---|-----------------------------------------------------------|
| NtTOGT1     | 1 | -----MGQLHIFFFP-VM-AHGHIIP                                |
| BvUGT73A4   | 1 | -----MDDKSQQLHIVLFP-FM-AHGHIIP                            |
| Db5-GT      | 1 | -----MGTHSTAPDLHVVFPP-FL-AHGHIIP                          |
| AtUGT86A1   | 1 | -----MERAKSRKPHIMMIP-YP-LQGHVIP                           |
| ZmUFGT1     | 1 | -----MAPADGESSPPP HVAVVA-FP-FSSHAAV                       |
| CteUGT78K6  | 1 | -----MKNKQHVAIFP-FP-FGSHLPP                               |
| AtUGT78D1   | 1 | -----MTKFSEPIRDSHVAVLAFPP-VGAHAGP                         |
| CoUGT78B3   | 1 | -----MGQSKSESEAHVAVIA-FP-FGSHAAQ                          |
| MtUGT78G1   | 1 | -----MSTFKNEMNGNLLHVAVLA-FP-FGTHAAP                       |
| LgUGT78J1   | 1 | -----MVFESHIGVVA-FP-FGTHAAP                               |
| CpPGT11     | 1 | -----MSSPHVVVIP-NP-EQGHVIP                                |
| AtUGT83A1   | 1 | -----MDNNSNKRMRPHVVVIP-YP-AQGHVLP                         |
| FaUGT75T1   | 1 | -----MESRNHHFLVIS-CA-AQGHVLP                              |
| AtUGT75C1   | 1 | -----MATSVNGSHRRPHYLLVT-FP-AQGHVLP                        |
| AtUGT75B1   | 1 | -----MAPPHFLVLT-FP-AQGHVLP                                |
| AtUGT75D1   | 1 | -----MANNNSNSPTGPHFLVFT-FP-AQGHVLP                        |
| ZmUGT74A1   | 1 | -----MAPHVLLVP-FP-GQGHMNP                                 |
| AsUGT74H5   | 1 | -----MGAWEHVSDIHVLLLP-YP-VQGHVLP                          |
| BdUGT74J7   | 1 | -----METNSPSSAEEGSGTGGAHVLLLA-FPGAQGHVLP                  |
| SrUGT74G1   | 1 | -----MAEQQKIKKSPHVLLIP-FP-LQGHVLP                         |
| AtUGT74B1   | 1 | -----MAETTPKVKGHVVLIP-YP-VQGHVLP                          |
| RsUGT74R1   | 1 | -----MATKKTQILIP-YP-IQGHVLP                               |
| LuUGT74S1   | 1 | -----MAGDEREKAHCLVVP-AA-AQGHVLP                           |
| AtUGT74F1   | 1 | -----MEKMRGHVLAVP-FP-SQGHVLP                              |
| SgUGT74AC1  | 1 | -----MEKGDTHILVFP-FP-SQGHVLP                              |
| AtUGT74C1   | 1 | -----MSEAKKGHVLFPP-YP-LQGHVLP                             |
| AtUGT74D1   | 1 | -----MGEKAKANLVVFS-FP-IQGHVLP                             |
| AtUGT74E2   | 1 | -----MREGSHLIVLP-FP-GQGHVLP                               |
| AtUGT84B1   | 1 | -----MGSSEGEETHVLMVT-LP-FQGHVLP                           |
| DgphBAGT    | 1 | -----MGSDQTLHHHVLLVS-FP-SQGHVLP                           |
| MtUGT84F1   | 1 | -----MASEASHILLVS-FP-AQGHVLP                              |
| GtUF6CGT1   | 1 | -----MGSLTNNNDNLHIFLVC-FI-GQGHVLP                         |
| PgUGT84A23  | 1 | -----MGSESLVHVFLVS-FP-GQGHVLP                             |
| PgUGT84A24  | 1 | -----MGSESLVHVFLVS-FP-GQGHVLP                             |
| AtUGT76E1   | 1 | -----MEELGVKRRIVLVP-VP-AQGHVLP                            |
| AtUGT76D1   | 1 | -----MAEIRQRRVLMVP-AP-FQGHVLP                             |
| SrUGT76G1   | 1 | -----MENKTETTIVRRRRRIILFP-VP-FQGHVLP                      |
| VvGT15      | 1 | MGFHTRSSLRKSIPSMIVMLRERTGQVKESHLSTLPRREMPRRVLP-CP-FQGHVLP |
| AtUGT76C1   | 1 | -----MEKRNERQVILFP-LP-LQGHVLP                             |
| AtUGT76B1   | 1 | -----METRETKPVIFLFP-FP-LQGHVLP                            |
| CsUGT76F1   | 1 | -----MDQRKGRRLVLP-LP-LQGHVLP                              |
| OsUGT709A4  | 1 | -----MGAAAHVLVFP-MP-LQGHVLP                               |
| SrUGT85C2   | 1 | -----MDAMATTEKKPHVIFIP-FP-AQGHVLP                         |
| CoUGT85N1   | 1 | -----MASSSPKTPHIVCVP-AP-AQGHVLP                           |
| MeUGT85K4   | 1 | -----MGSISPQKPPHAILVP-YP-AQGHVLP                          |
| AtUGT85A1   | 1 | -----MGSQIIHNSQKPHVVCVP-YP-AQGHVLP                        |
| MtUGT85H2   | 1 | -----MGNFANRKP HVVMIP-YP-VQGHVLP                          |
| MtUGT71G1   | 1 | -----MSMSDINKNSELIFIP-AP-GIGHVLP                          |
| MdUGT71K1   | 1 | -----MKKVELVFIIP-SP-GAGHLP                                |
| AtUGT89A2   | 1 | -----MTEVLLLPGTKSENSKPPHIVVFP-FP-AQGHVLP                  |
| AtUGT89C1   | 1 | -----MTTTTTKPHVLP-FP-QSGHMVP                              |
| AtUGT89B1   | 1 | -----MKVNEENKPKTHVLIIP-FP-AQGHVLP                         |
| NmUGT89P1   | 1 | -----MPSILSNSAHILLFP-FP-TSGHIIP                           |
| AtUGT92A1   | 1 | -----MAEAKPRNLRIVMFP-FM-GQGHVLP                           |
| GbUGT92K1   | 1 | -----MAAGSQETVRMHVLMFP-YP-AQGHVLP                         |
| GmUGT92G4   | 1 | -----MAETPNKGHIVMVP-LM-AQGHVLP                            |
| PoUGT90A7   | 1 | -----MASLLPDNSTHRPHFVLP-FM-SKGHVLP                        |
| AtUGT90A1   | 1 | -----MSVSTHHHVVLFP-FM-SKGHVLP                             |
| AcUGT73J1   | 1 | -----MAFDKKQLHILFFP-LM-SPGHVLP                            |
| MtUGT73P1   | 1 | -----MESFGVKVEEETMLKAVFLP-FI-SKSHVLP                      |
| SrUGT73E1   | 1 | -----MSPKMVAPPTNLHFVLP-LM-AQGHVLP                         |
| CpPGT4      | 1 | -----MASEASQVHFLLLP-YL-APGHVLP                            |
| AtUGT73C1   | 1 | -----MASEFRPPLHFVLP-FM-AQGHVLP                            |
| CpPGT2      | 1 | -----MDTQANQLHFVLP-FL-AQGHVLP                             |
| PjGAT       | 1 | -----MSQSPAMSKMQNQLHFVLP-LL-AQGHVLP                       |
| CtiUGT73AE1 | 1 | -----MAPESASRIHFLLIIP-LL-APGHVLP                          |
| CaUGT73AH1  | 1 | -----MDSQFQQLHFVMIIP-LM-CPGHVLP                           |
| PzGAT2      | 1 | -----MDSPSDQLHIVMIIP-LM-CPGHVLP                           |
| AcUGT73G1   | 1 | -----MNSNHPLHVIFIP-FL-AQGHVLP                             |
| MtUGT73K1   | 1 | -----MGTESKPLKIYMLP-FF-AQGHVLP                            |
| GeUGT73F1   | 1 | -----MDLEREGTEKPLKLYFIH-YL-AAGHMIP                        |
| AtUGT73B1   | 1 | -----MGTPVEVSKLHFLFP-FM-AHGHIIP                           |
| GuUGAT      | 1 | -----MTMGNENRELIIFFP-FL-ANGHIIP                           |
| NmUGT73BD1  | 1 | -----MTAQFHVVFP-LM-AQGHVLP                                |

|             |    |                             |                |            |            |                |            |             |
|-------------|----|-----------------------------|----------------|------------|------------|----------------|------------|-------------|
| AtUGT81A1   | 29 | NRSPCSNSDGYALSSSNALYFNGFRTL | --PSRRMG       | -KTLASLSFN | -TKS       | ----           | SAG        | --SS        |
| AtUGT80A2   | 41 | SGVVIV-SEELE                | -----T         | -----      | NPKTVV     | -ASIADETVA     | -ESS       | ----GTG     |
| AtUGT80B1   | 20 | VKSKA-S--LE                 | -----E         | -----      | -TS        | -GSVDTTPED     | -SGH       | ----RSS     |
| OsZOGT3     | 27 | VLHLSL-Q--LA                | -----S         | -----      | SSHGLA     | -VHYAAPAQ      | -LRQ       | ----ARA     |
| OsZOGT1     | 25 | LMHLSL----                  | LL             | -----      | ASRGLD     | -VHYAAPAH      | -LRQ       | -----       |
| ZmcisZOG1   | 25 | LHLSL----                   | LL             | -----      | ASRGLS     | -VHYAAPPH      | -VRQ       | -----       |
| GmUGT79A6   | 28 | FVQLSNKL--FS                | -----H         | -----      | G--VH      | -VTFLSAASN     | -IPR       | -----       |
| AtUGT79B6   | 21 | FLHLANKL----                |                | -----      | AEKDHK     | -ITFLLPKA      | -RKQ       | -----       |
| GmUGT91H9   | 19 | YLELSK----                  | IL             | -----      | AQKGFH     | -VTFISTPKNIDGM |            | -----       |
| ZmUGT91L1   | 25 | GLEFAERL----                |                | -----      | AEHGQR     | -VSFVSTQGI     | -LRR       | -----       |
| PoUGT95A1   | 39 | AMELCKNI----                |                | -----      | SAHNYN     | -VTLIIPSHL     | -SSS       | -----       |
| MtUGT95B4   | 19 | CFQLCNHL----                |                | -----      | TSTNFH     | -VTLLISSTL     | -ATS       | -----       |
| PgUGT95B2   | 19 | SMELCK-H--FA                | -----S         | -R         | -N--FR     | -AVLVISSNL     | -SSS       | -----       |
| VvUGT95B6   | 19 | CIELCRHL----                |                | -----      | ASRTFN     | -TLLIISNL      | -SSS       | -----       |
| AtUGT82A1   | 23 | MLHLASAF--LS                | -----R         | -----      | G--FS      | -PVVMTPEI      | -HRR       | ----ISA     |
| VpUGT94F1   | 25 | FLELAKTL----                |                | -----      | SKRNFT     | -IHFCSTAIN     | -LDS       | -----       |
| AtUGT87A1   | 12 | MLNLCKSL--VR                | -----          | -----      | RDPNLT     | -VTFVVT        | TEEW       | -----       |
| AtUGT72C1   | 19 | ILELKG-H--LL                | -----          | -----      | NHHGFDR    | -VTVFLVTD      | -VSR       | ----SKS--LI |
| AtUGT72D1   | 20 | ILELGN-R--LS                | -----          | -----      | SVLNH      | -VTILAVTSG     | -SSS       | -----PT     |
| LjUGT72AD1  | 23 | LLEFCR-R--LA                | -----H         | -----      | LHQDIH     | -ITCINPTFE     | -SPC       | ----SYV     |
| AtUGT72B1   | 23 | LIEFAK-R--LV                | -----          | -----      | HLHGLT     | -VTFVIAGE      | -PPS       | -----KA     |
| VvUGT1      | 22 | LIEFAR-R--LV                | -----          | -----      | LHHNFS     | -VTFLIPTDG     | -SPV       | -----TP     |
| LjUGT72AH1  | 21 | LIEFAK-R--LV                | -----H         | -L         | -HQDNFQ    | -VTCIPTLS      | -NSP       | ----TIA     |
| LjUGT72Z2   | 21 | IIIEFCKKL--LH               | -----          | -----      | LHHHYH     | -VTCIFPTID     | -APV       | -----AA     |
| GmUGT72X4   | 21 | IIIEFSKRL--IK               | -----          | -----      | HHQNFH     | -VTCIVPSLG     | -PPP       | -----ES     |
| MtUGT72L1   | 28 | ILHFSKLL--IQ                | -----          | -----      | LHPDIH     | -VTCIPTLG      | -SPP       | -----SS     |
| PgUGT72BD1  | 24 | VLQIGE-R--FV                | -----          | -----      | SRHNFV     | -VTVFVVTD      | -AAT       | ----AES--Q  |
| AtUGT72E1   | 13 | VIELGK-R--LA                | -----          | -----      | GSHGFD     | -VTIFVLETD     | -AAS       | ----AQS--QF |
| OsUGT706C1  | 22 | MVQLAEAL--VR                | -----          | -----      | RGVSVT     | -LAVADPPDK     | -GAV       | ----LAG--A  |
| OsUGT706D1  | 23 | MVELAKLF--LT                | -----          | -----      | RGLDVT     | -IAVPATPGS     | -GTT       | ----GSP--T  |
| MtUGT88E1   | 19 | MVELGKLI--LT                | -----          | -----      | HHPSFS     | -IKILILTTP     | -NQDTNTINV | STSQY       |
| VpUGT88D8   | 17 | VLVIK----                   | FI             | -----      | NKHHP      | -ISIIILSNAP    | DSA        | -----       |
| NmUGT88P1   | 20 | MVELAKLI--LN                | -----          | -----      | REPSYS     | -IIIFISSAP     | -YST       | ----GSSAPY  |
| AtUGT88A1   | 20 | MVELGKTI--LS                | -----          | -----      | KNPSLS     | -IHIIIVPPP     | -YQP       | ----ESTATY  |
| VvGT7       | 18 | MVELGKLI--LK                | -----          | -----      | HHPSFS     | -ITIFIVTTP     | -YNT       | ----GSTAPY  |
| MdUGT88F1   | 19 | MVELGKFI--VH                | -----RY        | -----      | GPHKFS     | -ITILYTCGS     | -IVD       | ----TASIPVY |
| ScUGT5      | 19 | TVELGK-L--IL                | -----          | -----      | RHHHFT     | -IHVLIITGF     | -DDS       | ----PHTATY  |
| OsUGT707A2  | 26 | MLEVGRM--LR                 | -----SRCCGDDDD | GRPAMS     | -LTVLLAQLP | -ESHRAPEIDEI   | IRR        | -----       |
| AtUGT71B1   | 19 | TTALAK-L--LV                | -----A         | -----      | SDNRLS     | -VTLIVIPSR     | -VSD       | ----DAS     |
| MdUGT71A15  | 21 | TVEAK-Q--LA                 | -----A         | -----      | RDDQLF     | -ITVIVMKLP     | -YAQ       | -----       |
| BvUGT71F1   | 30 | AVELAKLI--IQ                | -----          | -----      | RNHRIS     | -IVILINIPT     | TTTS       | ----LINDFVH |
| Db6-GT      | 20 | AVELSK-L--II                | -----R         | -RE        | -NRISVL    | -ILILSFPFD     | -SGL       | ----VNA     |
| AtUGT71C1   | 23 | TIELAKRL--IS                | -----Q         | -----      | DNPRIHT    | -ITILYWGLP     | FIQ        | ----ADTIAF  |
| AtUGT71C4   | 21 | HIEFAK-R--LI                | -----N         | -----      | LDHRIHT    | -ITILNLSSP     | -SSP       | ----HAS--VF |
| AtUGT71D1   | 20 | FIEFAR-R--LI                | -----E         | -----      | QDDRIR     | -ITILLMKLG     | -GQS       | ----HLD--TY |
| FaUGT71W2   | 20 | TIEFSK-R--LL                | -----D         | -----      | RCDQFS     | -VTILLMKSP     | -FGV       | ----AAD     |
| MtUGT71G1   | 26 | ALEFAK-L--LT                | -----N         | -----      | HDKNLY     | -ITVFCIKFP     | -GMP       | ----FAD--SY |
| MdUGT71K1   | 20 | TLQFVK-R--LI                | -----D         | -----      | RNDRIS     | -ITILAIQSY     | -FPT       | ----TLS     |
| AtUGT89A2   | 34 | LLDLTHQL--CL                | -----R         | -----      | G--FN      | -VSVIVTPGN     | -LTY       | -----       |
| AtUGT89C1   | 25 | HLDLTHQI--LL                | -----          | -----      | RGAT       | -VTVLVTPKN     | -SSY       | -----LD     |
| AtUGT89B1   | 29 | LDFTH-R--LA                 | -----L         | -R         | -GGAALK    | -ITVLVTPKN     | -LPF       | -----       |
| NmUGT89P1   | 25 | ILDLANQL--LA                | -----R         | -----      | G--LT      | -ITILITPAN     | -LTL       | ----LST     |
| AtUGT92A1   | 25 | FVALAL-R--LE                | -----          | -----      | KIMIMNRANK | TTISMINTPSN    | -IPK       | -----       |
| GbUGT92K1   | 27 | FIELSK-L--LA                | -----          | -----      | SRGGFT     | -ITIVNTPLN     | -IQR       | ----LQSKIAL |
| GmUGT92G4   | 24 | FLALAR-Q--IQ                | -----          | -----      | QNTSFT     | -ITIANTPQN     | -IQH       | ----LRS     |
| PoUGT90A7   | 29 | LLHLAK----                  | LL             | -----      | ATRGIN     | -VTVFTKAN      | -RPF       | -----       |
| AtUGT90A1   | 24 | LQFGR-L--LL                 | -----R         | -HHR       | -KEPTIT    | -VTVFTPKN      | -QPF       | ----ISD     |
| AcUGT73J1   | 24 | MIDMAC----                  | IF             | -----      | ASHNVR     | -STVVA         | TPSD       | -ASK        |
| MtUGT73P1   | 30 | VVDIAR----                  | LF             | -----      | AMHNVD     | -VTIITPAN      | -AAI       | ----FQT     |
| SrUGT73E1   | 28 | MVDIAR-I--LA                | -----Q         | -R         | -G--AT     | -VTIITPYH      | -ANR       | ----VRP--VI |
| CpPGT4      | 24 | MFDIAR-L--LA                | -----Q         | -H         | -G--AI     | -VTIVTTPVN     | -VAR       | ----FKT--VI |
| AtUGT73C1   | 25 | MVDIAR----                  | LL             | -----      | AQRGVT     | -ITIVTTPQ      | NAGRF      | ----KNVL    |
| CpPGT2      | 24 | MIDIAR----                  | LL             | -----      | AQRGVI     | -ITIVTTPVN     | -AAR       | ----FNG--IL |
| PjGAT       | 30 | MIDMAR----                  | LL             | -----      | AQHGTV     | -VSLVTPHN      | -ASR       | ----FAS     |
| CtiUGT73AE1 | 25 | MIDIAR-L--LA                | -----          | -----      | QRPNVV     | -VTIVTTPVN     | -AAR       | ----YGP--NL |
| CaUGT73AH1  | 24 | LVDMAK----                  | LL             | -----      | AQRAVT     | -VTIVTTPRN     | -AIR       | ----FGA--AT |
| PzGAT2      | 24 | MVDMAK----                  | LL             | -----      | AQRAVT     | -VTIVTTPRN     | -AIR       | ----FGA--VI |
| AcUGT73G1   | 24 | TIDLCK----                  | LF             | -----      | ASHGVK     | -VTVLT         | TKGN       | -LSR        |
| MtUGT73K1   | 24 | LVNLAR----                  | LV             | -----      | ASKNOH     | -VTIITTPSN     | -AQL       | ----FDK     |
| GeUGT73F1   | 28 | LCDIAT-L--FA                | -----S         | -R         | -G--HH     | -VTIITTPSN     | -AQT       | ----LRR     |
| AtUGT73B1   | 26 | LDMAR----                   | LF             | -----      | ATKGAK     | -STILT         | TPLNAKLF   | ----FEKPIKS |
| GuUGAT      | 26 | CVDLAR----                  | VF             | -----      | AARGIR     | -ATIVT         | THLN       | -VPY        |
| NmUGT73BD1  | 21 | LLEIVK----                  | LF             | -----      | SSRGLK     | -TTIVT         | TKLH       | -VPV        |
| NmUGT73BD1  | 1  |                             |                |            |            | -MTAQFHV       | VVFFP      | -LM-AQGHLP  |

|             |    |             |     |    |             |              |     |             |            |             |
|-------------|----|-------------|-----|----|-------------|--------------|-----|-------------|------------|-------------|
| NtTOGT1     | 20 | TLDMAK      | --- | LF | -----       | ASRGVK       | -AT | IIT         | TPLNEFVF   | -----       |
| BvUGT73A4   | 24 | TLDIAR      | --- | LF | -----       | AARGVK       | -T  | LIT         | TPRN-APT   | ---FLT---AI |
| Db5-GT      | 26 | SLDIAK      | --- | LF | -----       | AARGVK       | -T  | IIT         | TPLN-ASM   | ---FTKAIEK  |
| AtUGT86A1   | 25 | FVHLAIKL    | --- |    | -----       | ASHGFT       | -I  | TFVN        | TDSI-HHH   | ISTAHQDDAGD |
| ZmUGFT1     | 28 | LLSIARALAAA | --- |    | -----       | APSGAT       | -L  | SFLS        | TASS-LAQ   | ---LRK---AS |
| CteUGT78K6  | 21 | LLNLVL-K    | --- | LA | -----H      | IAPNTS       | -F  | SFIG        | THSS-NAF   | -----       |
| AtUGT78D1   | 28 | LLAVTR-R    | --- | LA | -----       | AASPSTI      | -F  | SFFN        | TARS-NAS   | -----       |
| CoUGT78B3   | 26 | LLNLTR-R    | --- | LA | -----A      | SAPEVT       | -F  | SFFS        | TAKS-NKA   | -----       |
| MtUGT78G1   | 30 | LLSLVKKI    | --- | AT | -----       | EAPKVT       | -F  | SFFC        | TTTT-NDT   | -----L      |
| LgUGT78J1   | 21 | LLDVVQ-R    | --- | IA | -----A      | SAPGTL       | -F  | SFFN        | TADS-NRK   | ---LFN---   |
| CpPGT11     | 20 | LELSONL     | --- |    | -----       | AKHGLR       | -I  | TFVN        | SEYN-HNR   | -----       |
| AtUGT83A1   | 28 | LISFSR      | --- | YL | -----       | AKQGIQ       | -I  | TFIN        | TEFN-HNR   | -----       |
| FaUGT75T1   | 22 | SLQLAK      | -R- | LI | -----       | DIGSSH       | -V  | TFVT        | NIHG-LTQ   | -----       |
| AtUGT75C1   | 28 | ALQLANRL    | --- |    | -----       | IHHGAT       | -V  | YSTAVSA     | -HRR       | -----       |
| AtUGT75B1   | 20 | SLRFAR-R    | --- | LI | -----       | KRTGAR       | -V  | TFVTCVSV    | -FHN       | -----       |
| AtUGT75D1   | 28 | SLELAK      | -R- | LA | -----       | GTISGARV     | -T  | FAASISA     | -YNR       | -----       |
| ZmUGT74A1   | 19 | MVQFAK-R    | --- | LA | -----S--K   | G--VA        | -T  | LVT         | TRFI-QRT   | -----       |
| AsUGT74H5   | 27 | MLQFGK-R    | --- | LA | -----H--I   | GGVGR        | -C  | LAI         | TPYL-LRQ   | -----       |
| BdUGT74J7   | 36 | LLQFGRRL    | --- |    | -----       | AYHGLR       | -P  | TFVT        | TRYL-LST   | -----       |
| SrUGT74G1   | 27 | FIQFGK-R    | --- | LI | -----S--K   | G--VK        | -T  | LVT         | TIHT-LNS   | -----       |
| AtUGT74B1   | 26 | MVQFAKRL    | --- |    | -----       | VSKNVK       | -V  | TIAT        | TYT-ASS    | -----       |
| RsUGT74R1   | 22 | MLQFAKRL    | --- | AS | -----       | KSRHLI       | -L  | TL          | LLPTSH     | -----       |
| LuUGT74S1   | 25 | LLQFSK-R    | --- | LI | -----P--K   | R--IR        | -V  | LAL         | TRFI-HST   | -----       |
| AtUGT74F1   | 22 | IRQFCK-R    | --- | LH | -----S--K   | G--FK        | -T  | HTL         | TTFI-FNT   | -----       |
| SgUGT74AC1  | 22 | LLQLSKRL    | --- | IA | -----       | KGIK         | -V  | SLVT        | TLHV-SNH   | -----       |
| AtUGT74C1   | 23 | MIQLAKRL    | --- |    | -----       | SKKGIT       | -S  | TLI         | IASKD-HRE  | -----       |
| AtUGT74D1   | 23 | LLQFSKRL    | --- | LS | -----       | KNVN         | -V  | FLT         | TSST-HNS   | -----IL     |
| AtUGT74E2   | 21 | MSQFCKRL    | --- |    | -----       | ASKGLK       | -L  | TLV         | LVSDK-PSP  | -----       |
| AtUGT84B1   | 25 | MLKLAK-H    | --- | LS | -----L      | SSKNLH       | -I  | NLATIESA    | -RDL       | -----       |
| DgphBAGT    | 26 | LLRLAKHL    | --- |    | -----       | ASKGLL       | -A  | TSS         | THHIIHKI   | -----       |
| MtUGT84F1   | 23 | LLRLGKCL    | --- |    | -----       | AAKGAS       | -V  | IFIT        | TEKG-GKN   | ---MRITNKL  |
| GtUF6CGT1   | 26 | MLRLGKAF    | --- |    | -----       | ASKGLL       | -V  | LSAPEIVGTEI | -----      | ---RK       |
| PgUGT84A23  | 24 | LLRLGKRL    | --- |    | -----       | ASKGLL       | -V  | TFTPE       | SI-GKQ     | -----MR     |
| PgUGT84A24  | 23 | LLRLGKRL    | --- |    | -----       | ASKGLL       | -V  | TFTPE       | SI-GKQ     | -----MR     |
| AtUGT76E1   | 24 | IMQLGKAL    | --- |    | -----       | YSKGF        | -I  | TVVL        | TQYN       | -----       |
| AtUGT76D1   | 23 | MMNLASYL    | --- |    | -----       | SSQGF        | -I  | TIVR        | NEFN       | -----       |
| SrUGT76G1   | 29 | ILQLAN      | --- | VL | -----       | YSKGF        | -I  | TFH         | TNFN-KPK   | -----       |
| VvGT15      | 59 | MLQLGA      | --- | IL | -----       | HSRGFS       | -I  | VAH         | TQYN-SPD   | -----       |
| AtUGT76C1   | 23 | MLQLAK      | --- | IL | -----       | YSRGFS       | -I  | TIH         | TRFN-APK   | -----       |
| AtUGT76B1   | 24 | MFQLAN      | --- | IF | -----       | FNRGFS       | -I  | TVIH        | TKFN-SPN   | -----       |
| CsUGT76F1   | 23 | MLQLAN      | --- | IL | -----       | HSQGFT       | -I  | TIH         | TSFN-SPN   | -----       |
| OsUGT709A4  | 22 | MLHLAT-A    | --- | LA | -----       | AAAGVH       | -V  | TLH         | TDHN-LHR   | ---LGNA     |
| SrUGT85C2   | 27 | MLKLAQ      | --- | IL | -----       | HHKGLQ       | -I  | TFVN        | TDFI-HNQ   | ---FLE---SS |
| CoUGT85N1   | 25 | MFKLAK-L    | --- | FH | -----S--R   | G--FY        | -I  | TFVHSEFS    | -YQR       | ---LLQ---AS |
| MeUGT85K4   | 26 | LMQLGK      | --- | LL | -----       | HARGFY       | -I  | TFVN        | TEHN-HRR   | ---LIR---SR |
| AtUGT85A1   | 28 | MMRVAK      | --- | LL | -----       | HARGFY       | -V  | TFVN        | TVYN-HNR   | ---FLR---SR |
| MtUGT85H2   | 25 | LFKLAK      | --- | LL | -----       | HLRGFH       | -I  | TFVN        | TEYN-HKR   | ---LLK---   |
| MdUGT71K1   | 20 | TLQFVK-R    | --- | LI | -----D      | RNDRIS       | -I  | TLAI        | QSY-FPT    | ---TLS---   |
| AtUGT89A2   | 34 | LLDLTHQL    | --- | CL | -----R      | G--FN        | -V  | SVIV        | TPGN-LTY   | -----       |
| AtUGT89C1   | 25 | HLDLTHQI    | --- | LL | -----       | RGAT         | -V  | TLV         | TPKN-SSY   | ---LD       |
| AtUGT89B1   | 29 | LLDFTH-R    | --- | LA | -----L--R   | GGAALK       | -I  | TLV         | TPKN-LPF   | -----       |
| NmUGT89P1   | 25 | ILDLANQL    | --- | LA | -----R      | G--LT        | -I  | TLI         | TPAN-LTL   | ---LST---   |
| AtUGT92A1   | 25 | FVALAL-R    | --- | LE | -----       | KIMIMNRANKTT | -I  | SMIN        | TPSN-IPK   | -----       |
| GbUGT92K1   | 27 | FIELSK-L    | --- | LA | -----       | SRGGFT       | -I  | TIVN        | TPLN-IQR   | ---LQSKIAL  |
| GmUGT92G4   | 24 | FLALAR-Q    | --- | IQ | -----       | QNTSFT       | -I  | TIAN        | TPQN-IQH   | ---LRS---   |
| PoUGT90A7   | 29 | LLHLAK      | --- | LL | -----       | ATRGIN       | -V  | TFVT        | TKAN-RPF   | -----       |
| AtUGT90A1   | 24 | LLQFGR-L    | --- | LL | -----R--HHR | KEPTIT       | -V  | TFVT        | TPKN-QPF   | ---ISD---   |
| AcUGT73J1   | 24 | MIDMAC      | --- | IF | -----       | ASHNVR       | -S  | TVA         | TPSD-ASK   | -----       |
| MtUGT73P1   | 30 | VVDIAR      | --- | LF | -----       | AMHNVD       | -V  | IIT         | TPAN-AAI   | ---FQT---   |
| SrUGT73E1   | 28 | MVDIAR-I    | --- | LA | -----Q--R   | G--AT        | -V  | IIT         | TPYH-ANR   | ---VRP---VI |
| CpPGT4      | 24 | MFDIAR-L    | --- | LA | -----Q--H   | G--AI        | -V  | IVT         | TPVN-VAR   | ---FKT---VI |
| AtUGT73C1   | 25 | MVDIAR      | --- | LL | -----       | AQRGVT       | -I  | IVT         | TPQNA      | GRF---KNVL  |
| CpPGT2      | 24 | MIDIAR      | --- | LL | -----       | AQRGVI       | -I  | IVT         | TPVN-AAR   | ---FNG---IL |
| PjGAT       | 30 | MIDMAR      | --- | LL | -----       | AQHGVV       | -V  | SLVT        | TPHN-ASR   | ---FAS---   |
| CtiUGT73AE1 | 25 | MIDIAR-L    | --- | LA | -----       | QRPNVV       | -V  | IVT         | TPVN-AAR   | ---YGP---NL |
| CaUGT73AH1  | 24 | LVDMAK      | --- | LL | -----       | AQRAVT       | -V  | IVT         | TPRN-AIR   | ---FGA---AT |
| PzGAT2      | 24 | MVDMAK      | --- | LL | -----       | AQRAVT       | -V  | IVA         | TPRN-AIR   | ---FGA---VI |
| AcUGT73G1   | 24 | TIDLCK      | --- | LF | -----       | ASHGVK       | -V  | TLT         | TKGN-LSR   | ---FHSPLTR  |
| MtUGT73K1   | 24 | LVNLAR      | --- | LV | -----       | ASKNOH       | -V  | IIT         | TPSN-AQL   | ---FDK---   |
| GeUGT73F1   | 28 | LCDIAT-L    | --- | FA | -----S--R   | G--HH        | -V  | IIT         | TPSN-AQT   | ---LRR---   |
| AtUGT73B1   | 26 | TLDMAK      | --- | LF | -----       | ATKGAK       | -S  | ILT         | TPLNAKLF   | ---FEKPIKS  |
| GuUGAT      | 26 | CVDLAR      | --- | VF | -----       | AARGIR       | -A  | IVT         | THLN-VPY   | -----       |
| NmUGT73BD1  | 21 | TLLEIVK     | --- | LF | -----       | SSRGLK       | -T  | IVT         | TKLH-VPV   | ---ITKS     |
| NmUGT73BD1  | 1  |             | --- |    | -----       |              | -M  | TAQFHVVF    | FP-LM-AQGH | LIP         |

|             |    |                          |                    |                       |
|-------------|----|--------------------------|--------------------|-----------------------|
| AtUGT81A1   | 79 | LRRFISDFNSF              | IRFHCDKVVPE        | SFASVGGVGLSSDENGIREN  |
| AtUGT80A2   | 74 | NKSFSRVWVTMP             | SESSSTNQPRLDK      | SKT-ERQKQVTH          |
| AtUGT80B1   | 47 | DGHRGLDHCETAPVGLYGDMLIND | SEIQYSRSLTE        | KSPAIHNLKLDRLRSEQE    |
| OsZOGT3     | 58 | RVHGWDKALLS              | VQFHDL-GISTYVSPDP  | TADTPFPShLMPL         |
| OsZOGT1     | 51 | ARLRLHGWDPDALRS          | IRFHDL-DVPA        | YESPPDPPTAPFPShLMPL   |
| ZmcisZOG1   | 51 | ARARVHGWDPRALGS          | IRFHDL-DVPP        | YDSPAPDLAAPSFPFNHLMPL |
| GmUGT79A6   | 54 | IRSTLNLNPA               | INVISL-KFPN        | GITNTAELPPH           |
| AtUGT79B6   | 47 | LESNLNLPDC               | IVFQTL-TIPS        | VDGLP-DGAETTS DIPIS   |
| GmUGT91H9   | 46 | PKIPETLQPS               | IKLVRL-PLPHTDHHHHL | EDAESTMDIPSN          |
| ZmUGT91L1   | 51 | LRPVAPALASL              | IDLVAL-PFPR        | IDGLP-DGAEATSDLPPG    |
| PoUGT95A1   | 65 | IPSTFSNHSSF              | IHVTEISVAAS        | PPPEAADEPGSGTEV       |
| MtUGT95B4   | 45 | IPSSLHQHPL               | FQVTLI             | PSQPPPPSPEHH          |
| PgUGT95B2   | 45 | VPSSLRSLPL               | VEVVEI-PSSP        | TP-PPPPPSQPGSGD       |
| VvUGT95B6   | 45 | IPSDLRRIP                | FHFH-EISS          | SLP-PPPPPSPSPSD       |
| AtUGT82A1   | 52 | TNED                     | LGITFL-ALSD        | EQD-RPDAPSD           |
| VpUGT94F1   | 51 | IKSNLANDPSVLD            | IKLLEL-EIES        | PELP-PELHTTKNLPPH     |
| AtUGT87A1   | 37 | LGFIGSDPKP               | NRIHFA-TLPN        | IIP-SELVRANDFIAF      |
| AtUGT72C1   | 52 | GKTLMEEDPK               | FVIRFI-PLDV        | SGQDLSGSLLTK          |
| AtUGT72D1   | 49 | ETEAIHAAA                | RTICQITEIPS        | VDVDNLVEPDAT          |
| LjUGT72AD1  | 54 | VKALFENLPSN              | IECMFLPPVNL        | DDMAQTS DPAIL         |
| AtUGT72B1   | 52 | QRTVLDLSPSS              | ISSVFLPPVDL        | TDLSSSTRIESR          |
| VvUGT1      | 51 | QKSVLKALPTS              | INVFLPPVAF         | DDLPELVRIETR          |
| LjUGT72AH1  | 53 | SKPFFNALPTS              | IQCIFL-PPVN        | VK-NGNDPLETQ          |
| LjUGT72Z2   | 51 | TLKLLQSLPST              | IDFKFLPPVNK        | QDLPQDVSPAVQ          |
| GmUGT72X4   | 51 | SKAYLKTLPSN              | IDTILLPPISK        | EQLPQGVHPAIL          |
| MtUGT72L1   | 58 | SETILQTLPSN              | IDYMFL-PEVQ        | PSDLPQGLPMEIQ         |
| PgUGT72BD1  | 55 | LKQSYKKNL                | LNVLVLPVVDL        | TSLTNKPLAISQ          |
| AtUGT72E1   | 45 | LNSPGCDAAL               | VDIVGL-PTPD        | ISGLVDPSAFFGIK        |
| OsUGT706C1  | 54 | IARIAAVCP                | IGVRLP-PIPS        | CEGKTYSHVPMW          |
| OsUGT706D1  | 55 | IAGIAASNPS               | ITFHHL-PPPP        | SCADDPNPLLL           |
| MtUGT88E1   | 58 | ISSVSNKFP                | INFHYI             | PSISFTFTLPPHLQ        |
| VpUGT88D8   | 44 | ASSITSEASS               | ITYHRL-PTPD        | IPPNIITNPVEL          |
| NmUGT88P1   | 54 | ISHVSATTSG               | ISFHHL-PVLV        | LP-PNTFSSFEIAYK       |
| AtUGT88A1   | 54 | ISSVSSFP                 | ITFHHL-PAVT        | PYSSSTSRHHHESL        |
| VvGT7       | 52 | LARVSSTIPS               | ITFHHL-PTIS        | LP-LDSFSSPNHETL       |
| MdUGT88F1   | 56 | IRRISHSHPF               | ISFRQF-PRVT        | NNITRNI SVPAI         |
| ScUGT5      | 53 | IDQISKTNPS               | ITFHRL-PFLP        | LNLSP TVSSIAT         |
| OsUGT707A2  | 74 | EAAGASEHSG               | FDVRFH-CLPA        | EELPDFRGGEDF          |
| AtUGT71B1   | 50 | SSVYTNSEDR               | LRYILL             | PARDQTTD              |
| MdUGT71A15  | 49 | PFTNTDSSIS               | HRINFV-NLPE        | AQP-DKQDIVNPGSF       |
| BvUGT71F1   | 66 | SQSRNNPYPTH              | LTFMTLPPLSN        | PPERSSPDF             |
| Db6-GT      | 53 | YVDFQSRDPPDNS            | GSLTFI-TLPP        | LSNIPDCTSSTF          |
| AtUGT71C1   | 60 | LRSLVKNEPR               | IRLVTLPEVQD        | P-PPMELFVEFAESY       |
| AtUGT71C4   | 55 | ARSLIASQPK               | IRLHDLPPIQD        | P-PPFDLYQRAPEAY       |
| AtUGT71D1   | 53 | VKSIASSQPF               | VRFDVPELEE         | K-PTLGSTQSEAY         |
| FaUGT71W2   | 51 | --QSLPAASN               | TNIKLI-HLPN        | I-NPPIKLD SVEKF       |
| MtUGT71G1   | 59 | IKSVLASQPQ               | IQLIDL-PEVE        | P-PPQELLKSPEFY        |
| MdUGT71K1   | 51 | SYTKSIAASEPR             | IRFIDV-PQPQ        | DRPP-QEMYKSRAQI       |
| AtUGT89A2   | 60 | LSPLLSAHPS               | VTSVVF-PFPP        | HPSLS-PGVENVKDVGNS    |
| AtUGT89C1   | 53 | ALRSLHSPEH               | FKTLIL-PFPP        | HPCIP-SGVESLQQLPLE    |
| AtUGT89B1   | 58 | LSPLLSAVNV               | IEKTLIL-PFPP       | HPSIP-SGVENVQDLPPS    |
| NmUGT89P1   | 54 | QLIELDRLGS               | LHTLVL-PFPN        | PPNPSETS              |
| AtUGT92A1   | 58 | IRSNLPPESS               | ISLIEL-PFNS        | SDHGLP-HDGENFDSL PYS  |
| GbUGT92K1   | 61 | LRLQAENLD                | IRLAEL-PFDG        | TSHGLP-PNTESTESLPHS   |
| GmUGT92G4   | 54 | ALSSSTSPNHQ              | IHLAELVPFNS        | TQHSNK-DN-NTQKAPLT    |
| PoUGT90A7   | 55 | IAQFLHRHSNS              | VSIIDL-PFPR        | DVEGIP-QGIESTDKLPSMS  |
| AtUGT90A1   | 58 | FLSDTPE                  | IKVISL-PFPE        | NITGIP-PGVENTEKLPSMS  |
| AcUGT73J1   | 50 | IPLSKSKY                 | ISVVTI-PFPP        | PSLTNLP-PDHENLATIRSS  |
| MtUGT73P1   | 59 | SIDHDSRRGRS              | IRTHIV-KFPQ        | VPGLP-QGMESFNADTPKD   |
| SrUGT73E1   | 59 | SRAIATN                  | LKIQLL-ELQLRSTEAG  | GLP-EGCESFDQLPSFE     |
| CpPGT4      | 55 | ARAIKSGLQ                | IRLIEI-QFPW        | QEAGIP-EGCENC DLLPTT  |
| AtUGT73C1   | 56 | SRAIQSGLP                | INLVQV-KFPP        | QESGSP-EGQENLDDLDSL   |
| CpPGT2      | 55 | SRAIESGLQ                | IKIVQF-QLPC        | EEAGLP-EGCENLDMVASLG  |
| PjGAT       | 59 | TIHRARDSGLK              | IQLIQI-PFPC        | QEVGLP-EGCENLDSVPSRD  |
| CtiUGT73AE1 | 57 | QPHIDSGLP                | VRFLEL-PFPA        | AEAGLP-AGIESADSLPGLH  |
| CaUGT73AH1  | 55 | SRAIQSGLP                | IRLLEL-RFPT        | LEAGLP-EGCENVDQLSSFD  |
| PzGAT2      | 55 | GRAIESGLP                | IRLLEL-RFPA        | LEAGLP-EGCESVDDLPSLA  |
| AcUGT73G1   | 57 | ANELSTFLHP               | IQISLI-PFPP        | VSGLP-ENCENMATVPPH    |
| MtUGT73K1   | 53 | TIEEKAAGHH               | IRVHII-KFPP        | AQLGLP-TGVENLFAASDNQ  |
| GeUGT73F1   | 57 | SIPFNDYHQ                | LCLHTV-PFPP        | QEVGLP-DGVESLSSVTDLD  |
| AtUGT73B1   | 60 | FNQDNPGLED               | ITIQLI-NFPC        | TEGLP-DGCENTDFIFSTPDL |
| GuUGAT      | 52 | ISRTIGKAN                | INIRTI-KFPP        | TEDSGLP-EGCENTESALAPD |
| NmUGT73BD1  | 51 | IEKTNHSGNQ               | INISII-KFPC        | KEVGLP-EGSESLDTLKQPD  |
| NmUGT73BD1  | 1  |                          |                    | MTAQFHVVFFP-LM-AQGHLP |

|             |    |               |         |       |         |           |               |               |              |              |           |       |
|-------------|----|---------------|---------|-------|---------|-----------|---------------|---------------|--------------|--------------|-----------|-------|
| NtTOGT1     | 47 | SKAIQRNKHLGIE | TEIRLI  | -KFFA | -VEN    | GLP       | -EECERLDQIP   | PSDE          | --           |              |           |       |
| BvUGT73A4   | 55 | EKGNKSGAPT    | INVEVF  | -NFQA | -QSF    | GLP       | -EGCENLEQAL   | GP            | GP           |              |           |       |
| Db5-GT      | 59 | TRKNTETQ      | MEIEVF  | -SFPS | -EEA    | GLP       | -LGCENLEQAMA  | IG            | --           |              |           |       |
| AtUGT86A1   | 62 | IFSAARSSGQ    | HDIRYT  | -TVSD | ---     | GFP       | -LDFDRSLNHD   | QF            | ---          |              |           |       |
| ZmUFGT1     | 63 | SASAGHGLP     | GNLRFV  | -EVPD | ---     | GAPAAEESV | PVPRQMQLF     | --            | --           |              |           |       |
| CteUGT78K6  | 49 | --LFTKRHIP    | NNIRVF  | -TISD | ---     | GIP       | -EGHVPANNPIEK | ---           | ---          |              |           |       |
| AtUGT78D1   | 56 | --LFSSDHPE    | IKVHDV  | ---   | SD      | ---       | GVP           | -EGTMLGNPLEM  | ---          |              |           |       |
| CoUGT78B3   | 54 | --VSGSTGGA    | ENIKFY  | -DVHH | ---     | GVP       | -ENHSFSGNPLEE | ---           | ---          |              |           |       |
| MtUGT78G1   | 59 | FRSVNEFLPN    | TKYYNV  | ---   | HD      | ---       | GLP           | -KGYVSSGNPREP | ---          |              |           |       |
| LgUGT78J1   | 52 | --TC---AN     | IRIHEV  | ---   | WD      | ---       | GTP           | -RDQVFTGSF    | FEA          |              |           |       |
| CpPGT11     | 46 | VLESLEGKNYIG  | EQIHLV  | -SIPD | ---     | GIEPWDDR  | RSDMRKL       | ---           | ---          |              |           |       |
| AtUGT83A1   | 54 | IISLPLNSPH    | EDYVVG  | ---   | ---     | GLE       | -DSPEERNIP    | PKL           | ---          |              |           |       |
| FaUGT75T1   | 49 | ----IKSLPS    | ---     | ---   | ---     | GFD       | -DGVHPAND     | PEHI          | ---          |              |           |       |
| AtUGT75C1   | 54 | ---MGEP       | PS      | ---   | ---     | GFD       | -DGLKSFED     | QKIY          | ---          |              |           |       |
| AtUGT75B1   | 47 | --SMIANHNKV   | ---     | ---   | ---     | GFD       | -DGGISTYED    | RQKR          | ---          |              |           |       |
| AtUGT75D1   | 56 | RMFSTENVP     | ---     | ---   | ---     | GHD       | -DGFKSSAYS    | DKSRQD        | ---          |              |           |       |
| ZmUGT74A1   | 45 | --ADVDAHPA    | ---     | ---   | MVEAISD | ---       | GHD           | -EGGFASAAG    | VAEY         |              |           |       |
| AsUGT74H5   | 56 | ----CQDPCP    | ---     | ---   | GAVHLV  | -EISD     | ---           | GFD           | -SAGFEEVGD   | VAAAY        |           |       |
| BdUGT74J7   | 62 | ----VPPPA     | ---     | ---   | GPFRVA  | -AISD     | ---           | GFDAGGMAAC    | STFGDY       | ---          |           |       |
| SrUGT74G1   | 53 | --TLNHSNTT    | ---     | ---   | TTSIEIQ | AISD      | ---           | GCD           | -EGGFMSAGESY | ---          |           |       |
| AtUGT74B1   | 52 | ----ITTPS     | ---     | ---   | LSVE    | ---       | PISD          | ---           | GDFFIPIGIP   | PGFSVDTY     |           |       |
| RsUGT74R1   | 47 | ARSISSHIGS    | ---     | ---   | INVQ    | ---       | PISD          | ---           | GAD          | -QQGQQFTAETY | ---       |       |
| LuUGT74S1   | 51 | --MTVTAQSG    | ---     | ---   | IHIDTI  | ---       | SD            | ---           | GFD          | -HSGLILQD    | PEHY      |       |
| AtUGT74F1   | 48 | -----         | IHLDPSS | PISIA | TISD    | G         | YD            | -QGGFSSAGS    | VPEY         | ---          |           |       |
| SgUGT74AC1  | 48 | LQLQGAYSNS    | ---     | ---   | VKIEVI  | -SDGS     | ---           | ---           | EDRLET       | DTMRQT       | ---       |       |
| AtUGT74C1   | 49 | --PYTSDDYS    | ---     | ---   | ITVHTI  | ---       | HD            | ---           | GFF          | -PHEHPHAK    | FVD       |       |
| AtUGT74D1   | 51 | RRAITGGATA    | ---     | ---   | LPLSFV  | -PIDD     | ---           | GFE           | -EDHPSTDT    | SPDY         | ---       |       |
| AtUGT74E2   | 47 | --PYKTEH      | ---     | ---   | DSITVF  | -PISN     | ---           | Gfq           | -EGEPLQD     | LDDY         | ---       |       |
| AtUGT84B1   | 53 | LSTVEKPRYP    | ---     | ---   | VDLVFF  | ---       | SD            | ---           | GLP          | -KEDPKAPETL  | ---       |       |
| DgphBAGT    | 53 | HKSTGHVQPID   | IGG     | ---   | GRLRFE  | -SFTD     | ---           | GWE           | -DHDDPRR     | SDLN         | VY        |       |
| MtUGT84F1   | 56 | ATPIGDGS      | ---     | ---   | LMFQFF  | ---       | D             | ---           | ---          | DGLPDYAH     | PLDH      |       |
| GtUF6CGT1   | 55 | ANNLNDDQPI    | KVGS    | GM    | ---     | IRFEFF    | ---           | DD            | ---          | GWESVNGS     | KPF       | DVWVY |
| PgUGT84A23  | 52 | KASNISDQ      | PAPV    | GDGF  | ---     | IRFEFF    | ---           | ED            | ---          | GWD          | -EDEPRRQD | LDOY  |
| PgUGT84A24  | 51 | KASNIGEEP     | SPIG    | GDGF  | ---     | IRFEFF    | ---           | ED            | ---          | GWD          | -EDEPRRQD | LDOY  |
| AtUGT76E1   | 47 | --RVSSSKDF    | ---     | ---   | SDFHFL  | -TIPG     | ---           | SLT           | -ESDLKNL     | GP           | PKF       |       |
| AtUGT76D1   | 46 | FKDISHNFP     | PG      | ---   | IKFFTI  | ---       | KD            | ---           | GLS          | -ESDVKSL     | GLLEF     | ---   |
| SrUGT76G1   | 55 | ----TSNYPH    | ---     | ---   | FTFRFI  | -LDND     | ---           | ---           | ---          | PQDERIS      | NLPTH     | GPL   |
| VvGT15      | 85 | ----PSNHPD    | ---     | ---   | FSFL    | -PIPD     | ---           | GL            | ---          | SDGQNFAS     | LLNL      | ---   |
| AtUGT76C1   | 49 | ----SSDHP     | L       | ---   | FTFL    | -QIRD     | ---           | GLS           | -ESQTQSRD    | LL           | LQ        | ---   |
| AtUGT76B1   | 50 | ----SSNFP     | H       | ---   | FSFV    | -SIPD     | ---           | GL            | ---          | SEPE         | SPDVIEI   | ---   |
| CsUGT76F1   | 49 | ----PSSH      | PH      | ---   | LTFHFI  | QENLS     | ---           | ---           | ---          | ASEAST       | DDLVAF    | ---   |
| OsUGT709A4  | 53 | AAATTAGSP     | ---     | ---   | RRLRFL  | -SVPD     | ---           | GLP           | -DDHPRSAS    | DVP          | PVM       | ---   |
| SrUGT85C2   | 58 | GPHCLDGAP     | ---     | ---   | FRFETI  | ---       | PD            | ---           | GVS          | -HSPEASIP    | IRESL     | ---   |
| CoUGT85N1   | 56 | ALDHLKGL      | ---     | ---   | NNFRFE  | -TIPD     | ---           | GLP           | -PENKRGV     | SDV          | PEL       | ---   |
| MeUGT85K4   | 57 | GQEFIDGLP     | ---     | ---   | FKFEAI  | ---       | PD            | ---           | GLPY         | -TDRDATQ     | HVPSL     | ---   |
| AtUGT85A1   | 59 | GSNALDGLPS    | ---     | ---   | FRFESI  | ---       | AD            | ---           | GLP          | -ETDMDAT     | QDITAL    | ---   |
| MtUGT85H2   | 54 | SRGPKAFDGF    | ---     | ---   | TDFNFE  | -SIPD     | ---           | GLTPMEGD      | GDV          | SQDV         | PTL       | ---   |
| MdUGT71K1   | 51 | SYTKSIAASEPR  | ---     | ---   | IRFIDV  | -PQPQ     | ---           | DRPP          | -QEMYKSRA    | QI           | ---       | ---   |
| AtUGT89A2   | 60 | LSPLLSAHP     | SS      | ---   | VTSVVF  | -PFPP     | ---           | HPSLS         | -PGVENVK     | DV           | GN        | ---   |
| AtUGT89C1   | 53 | ALRSLHSP      | EPH     | ---   | FKTLIL  | -PFPS     | ---           | HPCIP         | -SGVESLQ     | QLPLE        | ---       | ---   |
| AtUGT89B1   | 58 | LSPLLSAV      | VN      | ---   | TEPLIL  | -PFPS     | ---           | HPSIP         | -SGVENQD     | LPPS         | ---       | ---   |
| NmUGT89P1   | 54 | QLIELDRLGS    | ---     | ---   | LHTLVL  | -PFPP     | ---           | ---           | ---          | PPNP         | SETS      | ---   |
| AtUGT92A1   | 58 | IRSNLPP       | ESS     | ---   | ISLIEL  | -PFNS     | ---           | SDHGLP        | -HDGENF      | D            | SLPYS     | ---   |
| GbUGT92K1   | 61 | LRLQAENLD     | ---     | ---   | IRLAEL  | -PFDG     | ---           | TSHGLP        | -PNTTESTE    | SLPHS        | ---       | ---   |
| GmUGT92G4   | 54 | ALSSSTSP      | NHQ     | ---   | IHLAEL  | VPFNS     | ---           | TQHSNK        | -DN          | -NTQ         | KAPLT     | ---   |
| PoUGT90A7   | 55 | IAQFLHRHSNS   | ---     | ---   | VSIIDL  | -PFPR     | ---           | DVEGIP        | -QGIESTD     | KLPSMS       | ---       | ---   |
| AtUGT90A1   | 58 | FLSDTPE       | ---     | ---   | IKVISL  | -PFPE     | ---           | NITGIP        | -PGVENTE     | KLPSMS       | ---       | ---   |
| AcUGT73J1   | 50 | IPLSKSKY      | ---     | ---   | ISVVTI  | -PFPS     | ---           | PSLTNLP       | -PDHENLAT    | IRSS         | ---       | ---   |
| MtUGT73P1   | 59 | SIDHDSSRGRS   | ---     | ---   | IRTHIV  | -KFPQ     | ---           | VPGLP         | -QGMESFN     | ADTP         | PKD       | ---   |
| SrUGT73E1   | 59 | SRAIATN       | ---     | ---   | LKIQLL  | -ELQLR    | STEAGLP       | ---           | EGCESFD      | QLPS         | F         | ---   |
| CpPGT4      | 55 | ARAIKSG       | LQ      | ---   | IRLIEI  | -QFPW     | ---           | QEAGIP        | -EGCENCD     | LLPT         | ---       | ---   |
| AtUGT73C1   | 56 | SRAIQSGLP     | ---     | ---   | INLVQV  | -KFPS     | ---           | QESGSP        | -EGCENLD     | LLD          | SLG       | ---   |
| CpPGT2      | 55 | SRAIESGLQ     | ---     | ---   | IKIVQF  | -QLPC     | ---           | EEAGLP        | -EGCENLDM    | VASL         | LG        | ---   |
| PjGAT       | 59 | TIHRARDSGLK   | ---     | ---   | IQLIQI  | -PFPC     | ---           | QEVGLP        | -PGCENLDS    | VPSRD        | ---       | ---   |
| CtiUGT73AE1 | 57 | QPHIDSGLP     | ---     | ---   | VRFLEL  | -PFPA     | ---           | AEAGLP        | -AGIESAD     | SLP          | GLH       | ---   |
| CaUGT73AH1  | 55 | SRAIQSGLP     | ---     | ---   | IRLLEL  | -RFPT     | ---           | LEAGLP        | -EGCENVD     | QLSS         | FD        | ---   |
| PzGAT2      | 55 | GRAIESGLP     | ---     | ---   | IRLLEV  | -RFPA     | ---           | LEAGLP        | -EGCESVDD    | LPSLA        | ---       | ---   |
| AcUGT73G1   | 57 | ANELSTFLHP    | ---     | ---   | IQISLI  | -PFPS     | ---           | VSGLP         | -ENCENMA     | TAPP         | PH        | ---   |
| MtUGT73K1   | 53 | TIEEKAAGHH    | ---     | ---   | IRVHII  | -KFPS     | ---           | AQLGLP        | -TGVENLFA    | ASDN         | Q         | ---   |
| GeUGT73F1   | 57 | SIPFNDYHQ     | ---     | ---   | LCLHTV  | -PFPS     | ---           | QEVGLP        | -DGVESL      | SSVTD        | L         | ---   |
| AtUGT73B1   | 60 | FNQDNPGLED    | ---     | ---   | ITIQIL  | -NFPC     | ---           | TEGLP         | -DGCENTD     | FIFST        | PD        | ---   |
| GuUGAT      | 52 | ISRTIGKAN     | ---     | ---   | INIRTI  | -KFPS     | ---           | TEDSGLP       | -EGCENTE     | SALAP        | ---       | ---   |
| NmUGT73BD1  | 51 | IEKTNHSGNQ    | ---     | ---   | INISII  | -KFPC     | ---           | KEVGLP        | -EGSESLD     | TLKQ         | PD        | ---   |
| NmUGT73BD1  | 1  | -----         | -----   | ----- | -----   | -----     | -----         | MTAQFHVVFFP   | -LM          | -AQGH        | LIP       | ---   |

|             |     |       |                                                           |
|-------------|-----|-------|-----------------------------------------------------------|
| AtUGT81A1   | 121 | GTGGV | LGEEGLPLNGVEADRPKKVLILMSDTGGGHRASAEAIRAAAFNOEFGDEYQVFITD  |
| AtUGT80A2   | 118 | ----  | ILAEDAAKIFDDKISAGKKLKLNLNRIATVKHDGTVEFEVFPADAI----PQPIVVD |
| AtUGT80B1   | 100 | ----  | KQKL-----IVELVRIQNDGTVEVIDNGTVPVSELWEFEPTKG----QSTITYE    |
| OsZOGT3     | 101 | ----  | WEAY-----TADARAPLSALLDEL-----SASHR-----RVVVVCD            |
| OsZOGT1     | 96  | ----  | LESF-----AVAARVPLAALLERL-----SASYSR-----RVVVVVD           |
| ZmcisZOG1   | 97  | ----  | FEAF-----AAAARAPLAALLQRL-----STSYR-----RVAVVVD            |
| GmUGT79A6   | 85  | ----  | LAGN-----LIHALDLTQDQVKS-----LLELK-----PHYVFFD             |
| AtUGT79B6   | 84  | ----  | LGSF-----LASAMDRTRIQVKEA-----VSVGK-----PDLIFFD            |
| GmUGT91H9   | 86  | ----  | KSYF-----LKLAYEALQGPVSEL-----LKTSK-----PDWFVVD            |
| ZmUGT91L1   | 89  | ----  | TAEL-----HVQAMDR LAPAFSAFLGAACAD-----GSDRK-----VDWVLLD    |
| PoUGT95A1   | 102 | RSSGP | PRGNP-----LQDQNLQMGKGIKSFSA-----RSGTR-----PTCVVID         |
| MtUGT95B4   | 73  | ----  | -----HDELTKGLQNIIFSNY-----PRPTR-----PVCAIVD               |
| PgUGT95B2   | 80  | ----  | LMAQ-----HRNHHSQMAQRLESVLSARASA-----PNSIP-----IACAVID     |
| VvUGT95B6   | 79  | ----  | PMSH-----HHPHHQMGTAIESLLSS-----RSTSPDYVPPLCAIID           |
| AtUGT82A1   | 77  | ----  | FFSI-----ENSMENIMPPQLERLL-----EEDLD-----VACVVVD           |
| VpUGT94F1   | 92  | ----  | QFPL-----LIKDFENSKSFFSI-----FDTLK-----PDMLIYD             |
| AtUGT87A1   | 72  | ----  | -----IDAVLTRLEEPFEQLLD-----RLNSP-----PTAIIAD              |
| AtUGT72C1   | 84  | ----  | LAEM-----MRKALPEIKSSVMEL-----EPR-----PRVFFVD              |
| AtUGT72D1   | 82  | ----  | IFTK-----MVVKMRAMKPAVRDAVK-----LMKRK-----PTVMIVD          |
| LjUGT72AD1  | 88  | ----  | IQAT-----IIRSLPSIYNVNLTLHCS-----SNSRG-----LASIVVD         |
| AtUGT72B1   | 86  | ----  | ISLT-----VTRSNPELRKVFDSFV-----EGGRL-----PTALVVD           |
| VvUGT1      | 85  | ----  | ISLS-----MTRSVPALRDSLRTL-----ESTR-----LVALVVD             |
| LjUGT72AH1  | 85  | ----  | LQIA-----ISDAMPSVREALRSL-----ASSSK-----VVALVVD            |
| LjUGT72Z2   | 85  | ----  | IQLA-----VSQSMPSFRDTMRS LH-----STTPH-----LTALIID          |
| GmUGT72X4   | 85  | ----  | IQLT-----ITLSLPSIHEALKSL-----CSKAP-----LTALVVD            |
| MtUGT72L1   | 92  | ----  | IQLT-----VTNSLPYLHEALKSL-----ALRIP-----LVALVVD            |
| PgUGT72BD1  | 89  | ----  | LVLI-----VROSLPDLRSAIASM-----KSR-----PTALIVD              |
| AtUGT72E1   | 79  | ----  | LLVM-----MRETIPTIRSKIEM-----QHK-----PTALIVD               |
| OsUGT706C1  | 86  | ----  | IVDA-----LRLANPVLRELLRSF-----PAA-----VDALVVD              |
| OsUGT706D1  | 87  | ----  | MLDV-----LRRSVPSLASLLRSI-----PS-----VAALVLD               |
| MtUGT88E1   | 88  | ----  | TLEL-----SPRSNHVHHLQSI-----AKTSN-----LKAVMLD              |
| VpUGT88D8   | 76  | ----  | LFEV-----PRLNNPNVKQYLEQI-----SQKTN-----VKAFIID            |
| NmUGT88P1   | 89  | ----  | IPQL-----NNPNLKLALQTIS-----KESD-----LKAFIID               |
| AtUGT88A1   | 89  | ----  | LLEI-----LCFSNPSVHRTLFSL-----SRNFN-----VRAMIID            |
| VvGT7       | 86  | ----  | AFEL-----LRLNNPNIHQALVSI-----SNNSS-----VRALIVD            |
| MdUGT88F1   | 88  | ----  | TFDF-----IRQNDPHVRSALQEI-----SKSAT-----VRAFIID            |
| ScUGT5      | 85  | ----  | LFEF-----IRLNATSVLHTLQKI-----LQTSK-----VRALIID            |
| OsUGT707A2  | 106 | ----  | ISRF-----MQQHASHAREAIAGL-----ESR-----VAAVVLD              |
| AtUGT71B1   | 74  | ----  | LVSY-----IDSQKQVRAVSVKVGADVST-----RSDSR-----LAGIVVD       |
| MdUGT71A15  | 84  | ----  | FRMF-----VENHKSHVRDAVINVLPESDQSES-----TSKPR-----LAGFVLD   |
| BvUGT71F1   | 97  | ----  | MRIL-----IELHEPLVKQAVEERIR-----AGSSK-----LAGFVLD          |
| Db6-GT      | 87  | ----  | FTTV-----IELHKPNVKQVVEERV-----SGSPK-----PAGFVID           |
| AtUGT71C1   | 95  | ----  | ILEY-----VKKMVP IREALSTLLSSRDE-----SGSVR-----VAGLVLD      |
| AtUGT71C4   | 90  | ----  | IVKL-----IKKNTPLIKDAVSSIVASRRGG-----SDSVQ-----VAGLVLD     |
| AtUGT71D1   | 87  | ----  | YVDV-----IERNIPLVRNIVMDILTSLA-----LDGVK-----VAGLVVD       |
| FaUGT71W2   | 82  | ----  | LSDY-----IETYKHHVKDTILNQVL-----PNSSR-----IAGVVID          |
| MtUGT71G1   | 92  | ----  | ILTF-----LESLIPHVKATIKTILSNK-----VGLVLD                   |
| MdUGT71K1   | 87  | ----  | FSLY-----IESHVPSVKKIITNLVSSSANS-----SDSIR-----VAALVVD     |
| AtUGT89A2   | 98  | ----  | GNLP-----IMASLRQLREPIINWFQ-----SHPNP-----PIALISD          |
| AtUGT89C1   | 90  | ----  | AIVH-----MFDALSRLHDPLVDF-----LSRQPPSDLPDAILGS             |
| AtUGT89B1   | 95  | ----  | GFPL-----MIHALGNLHAPLISWIT-----SHTSP-----PVAIVSD          |
| NmUGT89P1   | 82  | ----  | LAAR-----VHASSQ-LSNTIIQWFQ-----SHTSP-----PVAIVSD          |
| AtUGT92A1   | 96  | ----  | LVIS-----LLEASRSLREPFRDFMTKILK-----EEGQS-----SVIVIGD      |
| GbUGT92K1   | 98  | ----  | LFLP-----LLQASQQLQEPFQQLVQDIVR-----KEGRL-----PACIISD      |
| GmUGT92G4   | 92  | ----  | DLLK-----LGYASLTLEPPFRSLISQITE-----EDGHP-----PLCIISD      |
| PoUGT90A7   | 95  | ----  | FFPK-----FATATKLMQPDFEQAL-----EKIPD-----VTCIVSD           |
| AtUGT90A1   | 94  | ----  | LFVP-----FTRATKLLQPFEEETL-----KTLPK-----VSCFMVSD          |
| AcUGT73J1   | 87  | ----  | MFDL-----FVSALSFLQPPQLNL-----IHDLK-----PDCLISD            |
| MtUGT73P1   | 98  | ----  | IISK-----IYQGLAILQEQFTQL-----FRDMK-----PDFIVTD            |
| SrUGT73E1   | 97  | ----  | YWKN-----ISTAIDL LQQPAEDLLR-----ELSP-----PDCIISD          |
| CpPGT4      | 92  | ----  | DFAR-----FMKSLHMLQPPFENLFK-----EKTLK-----PCCIISD          |
| AtUGT73C1   | 94  | ----  | ASLT-----FFKAASLLEEPVEKLLK-----EIQPR-----PNCIISD          |
| CpPGT2      | 93  | ----  | LAFD-----FFTAADMLQEPVENVFA-----QLKPR-----PNCIISD          |
| PjGAT       | 99  | ----  | LIGN-----FFSALNKLQPPLEQHLQ-----ELMPP-----PSCIISD          |
| CtiUGT73AE1 | 95  | ----  | LLQN-----FSLAVDMLQQRLEQRFE-----SLEPR-----PSCIISD          |
| CaUGT73AH1  | 93  | ----  | FSKN-----FIDASKMQQGLEKIFG-----DIKPS-----PSCIISD           |
| PzGAT2      | 93  | ----  | MSIN-----FFAATKMLQEPVEKMLK-----DIKPS-----PSCIISD          |
| AcUGT73G1   | 94  | ----  | LKSL-----FFDAVAMLQPPFAF-----LKETN-----PDCVVAS             |
| MtUGT73K1   | 93  | ----  | TAGK-----IHMAAHFVKADIEEF-----MKENP-----PDCFIVSD           |
| GeUGT73F1   | 95  | ----  | NLAK-----VFQATTLRRTPIEHF-----VEENP-----PDCIVAD            |
| AtUGT73B1   | 101 | NVGD- | LSQK-----FLLAMKYFEEPLEEL-----LVTMR-----PDCLVGN            |
| GuUGAT      | 91  | ----  | KFIK-----FMKATLLLRDPLEHV-----LQEEQ-----PHCLVAD            |
| NmUGT73BD1  | 90  | ----  | MFMK-----FFRGLSL LQEPFEQI-----LQELS-----PDCLVAD           |
| NmUGT73BD1  | 1   | ----  | -----MTAQFHVVVFFP-LM-AQGHILP                              |





AtUGT81A1 181 L---WTD-HTPWPFNQLPRSYNFLVKHGTLWKMTYYGTSPRIVHQSNFAATSTFI----  
 AtUGT80A2 169 RGESKNGV-CADESIDGVDL-QYIPPMQIVMLIVGTRGDVQPFVAIAKRLQDYGHRVRLA  
 AtUGT80B1 144 KSLT----EFSRSIPRLKIALIVVGTGCDVQVFLA--MAKRLQAEFGHRVRLATHANFRS  
 OsZOGT3 132 TINS-FAV-EFAARL---PNGEAFVGVSCVAVSALAL--HIDTGRH-----  
 OsZOGT1 127 RLNS-FAA-AQAARL---PNGEAF---GLQCVAMSY--NIGWLDPEHR-----  
 ZmcisZOG1 128 RLNP-FAA-TEAARL-----ANADAFGLQCVAISY--NVGWLDPGHRLSDYG-----  
 GmUGT79A6 116 FAQH-WLP-KLASEV-GIKS--VHFSVYSAISDAYI--TVPSRFADVEGRNITFEDLKKP  
 AtUGT79B6 115 FAH-WIP-EIAREY-GVKS-VNFITISAACVAISF---VPGRSQDDLST-----  
 GmUGT91H9 117 FATE-WLP-PIAKSL-NIPC-AHYNLTAAWNKFVID--PPKDYQLNNSITLQDMCLP--  
 ZmUGT91L1 127 NEHA-SMA-DVASEH-KVPC-ILNMPYSAATTE-----  
 PoUGT95A1 141 VMMS-WSK-EIFVDH-EIPV-VSFTSGATASAVGY--GMWKAIEVGNMKPGEIRE----  
 MtUGT95B4 100 VMMS-WSN-NVFKKF-EIPT-VAFFTSGACSAAMEL--AAWKAQPLDLKYGEICF-----  
 PgUGT95B2 118 VMMS-WTA-EIFQKF-RIPL-VGFFTSGACSAAMEF--AQWKAGVDGLK-PGETRLLPGL  
 VvUGT95B6 117 VMMS-WSK-DIFHKF-NIPV-VSFFTSGACSAAMEY--ASWKAGAFNIKPSQGEVLP----  
 AtUGT82A1 110 LLAS-WAI-KHADRC-GVPV-AGFWPVMFAAYRLIQ--AIPELVRTGLVSKQKGCPRQLEK  
 VpUGT94F1 123 VFNP-WAA-GHALSH-GSPS-VWFMASGATICSFHYHQHLHKTGSLVPYEGVDFGEIK--  
 AtUGT87A1 101 TYII-WAV-RVGTKR-NIPV-ASFWTTSATILSLFINSDLLASHGHFPIEPSESKLDEI-  
 AtUGT72C1 113 LLGT-EAL-EVAKEL-GIMRKHVLVTTSAWFLAFTV--YMASLDKQELYKQLSSIG----  
 AtUGT72D1 115 FLGT-ELM-SVADDV-GMTAKYVYVPTHAWFLAVMV--YLPVLDTVVEGEYVDIKE----  
 LjUGT72AD1 122 GLIT-QVL-PMANEL-NVLS-YAYFPSTAMLLSLCL--YPSTFDKTFPCE-----  
 AtUGT72B1 118 LFGT-DAF-DVAVEF-HVPP-YIFYPPTANVLELLE-----  
 VvUGT1 116 LFGT-DAF-DVANEF-GIPP-YIFFPTTAMVLSLIF--HVPELDQKFSCEYRDLPE----  
 LjUGT72AH1 116 AFAH-EAM-EFGKEL-NMLS-YIYFPCSIMMLSLGL--HSSKLDET---VSCYERDHPQ  
 LjUGT72Z2 117 PFAN-EAL-EIGKEF-NLLS-YIYFPPSAMTSLSLFL--HLPKLHEEVSCYERDLTE----  
 GmUGT72X4 116 VFAF-QAL-EYAKEF-NALS-YFYFPPSAMILSLLM--HAPKLDEEVSGEYKDLTE----  
 MtUGT72L1 123 AFAV-EAL-NFAKEF-NMLS-YIYFCAAASLAWSF--YLPKLDEEETTCYERDLPE----  
 PgUGT72BD1 118 LFGT-EAF-AIADEF-HMLK-YEFFTTNAWFLALTL--YAPHVDEETHCEDDHLRHM----  
 AtUGT72E1 108 LFGT-DAI-PLGGEF-NMLT-YIFIASNARFLAVAL--FFPTLDKDMEEHIIKKQ----  
 OsUGT706C1 115 MFCI-DAL-DVAAEL-AVPA-YMFYPSAASDLAIYL--QVPHVARSAPSSFKDMADT---  
 OsUGT706D1 115 IFCA-EAV-DAAAAL-HVPA-YIYFTSAAGAFASL--GLMHYSTTTTTLNRDMGKA---  
 MtUGT88E1 119 FLNY-SAS-QVTNNL-EIPT-YFYYSAGASLLCLFL--NFPTFHKNATIPIKDYNMHT--  
 VpUGT88D8 107 FFCN-SAF-EVSTSL-NIPT-YFYVSSGGFGLCAFL--HFPTTDEIIPQDIDGLND----  
 NmUGT88P1 118 FFCT-AAV-EVSSNL-EIPT-YFFYFSSGSSAMCQFL--YLP TLHETITQKDLQDPNT---  
 AtUGT88A1 120 FFCT-AVL-DITADF-TFPV-YFFYTSGAACLAFSF--YLP TLIDETITPGKNLKDIP----  
 VvGT7 117 CFCT-AAL-SVAAQL-NIPF-YFFYFSSGACCLASFL--YLPFIHQQTTSFKDLNT---  
 MdUGT88F1 119 LFCCT-SAL-PIGKEF-NIPT-YFFCTSGAAILAAFL--YLPKIDEQTKTTESFKDLRDT-  
 ScUGT5 116 FFCT-SAF-PISESL-GIPV-YFFYFSSGLAAVAAYL--YFP TIDKQVDQSFKDLVDT---  
 OsUGT707A2 135 WFCT-TLL-DVTRDL-GLPG-YVFFYTSAAASLSSLL--RLPALDKEVAVDFEEMGG----  
 AtUGT71B1 111 MFCT-SMI-DIADEF-NLSA-YIFYTASNAYLGLQF--HVQSLYDEKELDVSEFKDTEM--  
 MdUGT71A15 124 MESA-SLI-DVANEF-KVPS-YLFFYTSNASALALMS--HFQSLRDEGGIDITELTSSSTA-  
 BvUGT71F1 130 MFCT-NMI-DIATNL-NVPA-YIFFYTSGANMLSLMF--HFQSMNDEGVFDLTKDHISPNA  
 Db6-GT 120 MLCF-AMM-DVAEEL-EVPS-YILFTSGANLLNVVF--HFLSLADNGV--DIATEVNDPD  
 AtUGT71C1 132 FFCV-PMI-DVGNEF-NLPS-YIFLTCAGFLGMMK--YLP ERHREIKSEFNRSFNEE--  
 AtUGT71C4 128 LFCN-SLVKDVGNEL-NLPS-YIYLTTCNARYLGMK--YIPDRHRKIASFVLDLSSGDE--  
 AtUGT71D1 123 FFCV-PMI-DVAKDI-SLPF-YVFLTTNSGFLAMMQ--YLADRHSDRTSVFVNSSE--  
 FaUGT71W2 115 MFCT-TMI-DIANEL-KVPS-FLFFYTSGA AFLGLLL--CLPERYDVGKEFVHSDP----  
 MtUGT71G1 122 FFCV-SMI-DVGNEF-GIPS-YLFLTSNVGFLSLML--SLKNRQIEEVFDDSDRDHQ--  
 MdUGT71K1 125 LFCV-SMI-DVAKEL-NIPS-YLFLTSNAGYLAFML--HLPILHE----KNQIAVEESD  
 AtUGT89A2 131 FFLG-WTH-DLCNQI-GIPR-FAFFSISFFLVSVLQ--FCFENIDLIKSTDPH-----  
 AtUGT89C1 125 SFLSPWIN-KVADAF-SIKS-ISFLPINAHSISVMW-----  
 AtUGT89B1 128 FFLG-WTK-----NL-GIPR-FDFSPSAAITCCILN--TLWIEMPTKINEDDDNEILH--  
 NmUGT89P1 114 FFLG-WTN-SLASQL-GIPR-LVFWPSPQVQRSSLVD--YIWQNDQLSDSDHQIQDNSVIS  
 AtUGT92A1 133 FFLG-WIG-KVCKEV-GVYS-VIFSASGAFGLGCRY--SIWLNLPHKETKQDQFL----  
 GbUGT92K1 135 IFLG-WTL-DVANRL-GIPR-IMFCTCGAYSTSIYY--SLWAHLPHRQTDSDTFC----  
 GmUGT92G4 129 MFLG-WVN-NVAKSL-GTRN-LTFTTCGAYGILAYI--SIWSNLPHRKTDSDDEFH----  
 PoUGT90A7 127 GFLS-WTL-ASANKF-RIPR-LAFYGMNMYVGAUSR--DVALNRLLSGPESSDELST--  
 AtUGT90A1 126 GFLW-WTS-ESA AKF-NIPR-FVSYGMNSYSAVSI--SVFKHLLF--TEPEKSDTE  
 AcUGT73J1 118 SLFP-WTA-DIALQF-KIPR-IIFHGAGVFPMPYVSA--NIFSHFPLDESKEEFF-----  
 MtUGT73P1 129 MFYP-WSV-DVADEL-GIPR-LICIGGSYFAHSAMN--SIEQFEPHAKVKSNSVSFL--  
 SrUGT73E1 130 FLFP-WTT-DVARRL-NIPR-LVFNNGPGCFYLLCIH--VAITSNILGENEPVSSNTE---  
 CpPGT4 125 MCFP-WTV-DTAAKF-NVPR-IIFHGFSCFCLFCHH--LLGVSKVHENVTSDE-----  
 AtUGT73C1 127 MCLP-YTN-RIAKNL-GIPK-IIFHGMCCFNLLCTH--IMHQNHFELETIESDKEYFP--  
 CpPGT2 126 MCLP-YTA-HIAGKF-NIPR-ITLHGTCFCFLVCYN--NLFTSKVFEVSSESEYLV--  
 PjGAT 132 KYLS-WTT-KTAEKI-HVPR-LVFHGMCCFSLSSH--NIRLYNAHLSVTSDSQPFV--  
 CtiUGT73AE1 128 RYML-WTA-DTAVKH-GLPR-IIFDGMNCFKQLCTH--NMYSNVLDG-----LSDSD  
 CaUGT73AH1 126 KHIM-WTA-KTAKKF-QIPW-IVFDGMSCFNQLCTE--ILHTTKVHENVSESEPFV---  
 PzGAT2 126 KHVF-WTS-DTAKKL-QIPW-IMFDGMSCFTQLCTE--NIYNSKVHESVSSSESFV---  
 AcUGT73G1 125 LFLA-WIH-NVAKEL-NIPS-LDFHGSNFSSKCMSh--TVEHNNLLDNSTAETVL----  
 MtUGT73K1 124 IIFT-WSE-STAKNL-QIPR-LVFNPISIFDVCMIQ--AIQSHNPESVSDSGPYQ----  
 GeUGT73F1 126 FIYQ-WVD-ELANKL-NIPR-LAFHNGFSLFAICAIESVKAHSLYASG-----  
 AtUGT73B1 136 MFFP-WST-KVAEKF-GVPR-LVFHGTGYFSLCASHCIRLPKNVATSSSEPFV----  
 GuUGAT 122 MFFP-WAT-DSA AKF-GIPR-IVFHGLGYFPLCVLA--CTRQYKPKQDKVSSYTEPFV--  
 NmUGT73BD1 121 MFFP-WTT-NVA AKY-NIPR-FV FHGFCLFALCVSE--NIRSYKPKFDVESDSEPIV--  
 NmUGT73BD1 1 -----MTAQFHVVFFP-LM-AQGHILIP

NtTOGT1 120 MFLP-WTT-DTAAKF-NIPR-IVFHGTSFFALCVEN--SVRLNKPFPKNVSSDSETFV---  
 BvUGT73A4 125 MFFP-WAT-DSAAKF-NIPR-LVFGHGFALCALCALE--IIRLHYPYNNASSDEEPLF---  
 Db5-GT 127 MFFT-WAA-DSTAKF-NIPT-LVFGHGFSAQAQCAKE--VMWRHEKPYKAVSSDTEVFS---  
 AtUGT86A1 130 TFYV-WSS-MICDKH-NLVN-VSFWTEPALVLNLYY--HMDLLISNGHFKSLDNRKDV--  
 ZmUGFT1 131 AFV--WPAADAASA-GAPW-VPVWTAASCALLAHI--RTDALREDVGDQAANRVDEP--  
 CteUGT78K6 115 AFVT-SSL-LVAQTL-NVPW-IAFWPWNVCSLSLYF--NIDLIRDKCKSKDAKNAT-----  
 AtUGT78D1 120 AFF--WFAADIAAEL-NATW-VAFWAGGANSLCAHL--YTDLIRETIGLKDVSMEEET---  
 CoUGT78B3 120 SFM--WMGVDAQTL-QVPC-VSVWAPGASSLCAHL--YTDILRQNTIGVGANAKYDEY--  
 MtUGT78G1 125 AFF--WFGADLAQEM-HAKW-VPLWTAGHPSLLTHV--YTDLIREKQTSKEVHVDVKS---  
 LgUGT78J1 112 AFL--WFSCDLAEKR-GVPW-VALWTSASCSLSAHM--YTHEILQALES-GVAERDEHDK  
 CpPGT11 115 GAAG-WAI-EVAEKM-KLRR-AVVVITSAATVALTF--SIPKLIEDGVINSNGTPIKEQM  
 AtUGT83A1 129 QSLG-WAI-EVAAKF-GIRR-TAFCPAAAASMVLGf--SIQKLIDDGLIDSdGTvrVnkt  
 FaUGT75T1 115 VLLP-WAA-EVASSF-GIASAFLCITSATSFAICGH--YFKDYKYSQSSSLPFPs-----  
 AtUGT75C1 121 VLVP-WVS-TVAREF-HLPT-TLLWIEPATVLDIYY--YYFNTSYKHLFDVE-----  
 AtUGT75B1 114 ILLN-WAP-KVAREF-QLPS-ALLWIQPALVFNIIY--THFMGNKS-----  
 AtUGT75D1 130 ILLT-WVA-ELAREF-HLPS-ALLWVQPVTVFSIFY--HYFNGYEDAISEMANTPSS---  
 ZmUGT74A1 108 SYED-WVL-PVARRM-GLPA-VPFSTQSCAVSAVYY--HFSQGR LAVPPGAAAADGSDGGA  
 AsUGT74H5 120 AFLQPWVP-RVARLH-GAAC-VSFFTQAAAVNVAYS-----RRVGKI-----  
 BdUGT74J7 126 PHLP-WAA-RVARAA-GVRT-AAFFSQPCAVDLIYG--EVWSGRVGLPIKDGSA-----  
 SrUGT74G1 118 SMTE-WVL-DVAIEF-GIDG-GSFFTQACVNSLYY--HVHKGLISLPLGE-----  
 AtUGT74B1 114 SFLP-WGL-EVARSM-ELSA-ASFFTNNLTVCSVLR--KFSNGDFSLPADNSAPFR---  
 RsUGT74R1 113 SFFP-WAL-DVAHSN-GLAA-APFFTQTCSSVSYF--LFKEGRLSDEMEL-----  
 LuUGT74S1 114 ASMP-WFL-DVAKRF-GIVG-AAFLTQSCAVNAIYY--HLREGTIKRPVVSdPAAG---  
 AtUGT74F1 112 SFMP-WAL-DLAMDF-GLAA-APFFTQSCAVNYINLYSYINNGSLTLP-----  
 SgUGT74AC1 112 STMP-WVL-EVAKEF-GLDR-APFYTQSCALNSINY--HVLHGQLKLPPEtP-----  
 AtUGT74C1 111 PFMP-FAL-DIAKDL-DLYV-VAYFTQPWLASLVYY--HINEGTYDVPVDRHENPT-----  
 AtUGT74D1 115 SCLP-YVL-DVCRKHGVA-ASFFTQSSSTVNATYI--HFLRGFEKFEFQN-----  
 AtUGT74E2 110 STMP-WLL-DVAHSY-GLSG-AVFFTQPWLVTAIYY--HVFKGSFSVSTKYGHST---  
 AtUGT84B1 111 PFTP-WVP-AVAASH-NISC-AILWIQACGAYSVYYRYMKTNSFPDLEDLNQTVe---  
 DgPHBAGT 125 PFIP-WVS-DVAEEL-GIPC-ALLWVQSCFVYSVYY--HYFHNLASFPtVDQPNK-----  
 MtUGT84F1 115 PFFP-WVS-DIAFEH-NIPS-ALLWNTSSAVFTICY---DYVHKLLPFPsNEEPYI---  
 GtUF6CGT1 127 PLVP-WVA-DVADSL-QIPC-ATLWVQSCASFSAYY--HYHHGLVFPFTESEPEI-----  
 PgUGT84A23 123 PFIP-WVS-DVAETL-GLPS-AMLWVQSCACFLAYY--HYHGLVFPFSENAMEI-----  
 PgUGT84A24 122 PFIP-WVS-DVAESL-GLPS-AMLWVQSCACFAAYY--HYHGLVFPFSESAMEI-----  
 AtUGT76E1 113 EYMY-FSQ-AAVKEF-QLPS-VLFTTTSATAFVCRS--VLSRVNAESFLLDMKDPKVS--  
 AtUGT76D1 108 EFVY-FPR-RVAEDM-NLPK-MVFSPPSAATSISRC--VLMENQSNGLLPPQDARSQL--  
 SrUGT76G1 125 ALWY-FAQ-SVADSL-NLRR-LVLMTSSLFNFHAHV--SLPQFDELGYLDPDDKTRLEEQ  
 VvGT15 145 ITMY-FAE-AVANHL-KVPS-INLVTSNVSTTIAHN--AFPSLLEKGHIPLQGSTL-----  
 AtUGT76C1 117 SGWV-FTQ-SVAESF-NLPR-FVLCAKYGFSFFLGHF--LVPQIRREGFLPVGDSE-----  
 AtUGT76B1 110 ALWY-FTH-DLTEKF-NFPR-IVLRTVNLSAFVAFS--KFHVLREKGYLSLQETKADSP-  
 CsUGT76F1 112 AMLP-FTQ-AVADSL-KLPR-IVLRTGGASSFVVF--AFPLLKERGFYPIQDSKGQEP-  
 OsUGT709A4 126 ALLT-FAI-DVAEEL-GVPA-LAFRTASASSLLAYM--SVPRLFELGELPFPFGDLDDEP  
 SrUGT85C2 121 GFLSVFTI-DAAKKL-GIPV-MMYWTLAACGFMGFY--HIHSLIEKGFAPLKDASYLTNG  
 CoUGT85N1 124 VAMD-FTL-QVSEEL-GPPV-VLFTTSLGCGVLGYM--HYGELLERGFYPLREESFLSNG  
 MeUGT85K4 125 GVMA-FAI-DAARHF-GILE-IOFWTTSCAGFMAYL--HHIELVRGIVPFKDESFLHDG  
 AtUGT85A1 127 GCMS-FTL-DVAEEL-GVPE-VLFWTTSGCAFLAYL--HFYLFIEKGLCPLKDESyltke  
 MtUGT85H2 126 CCMS-FTI-QAAEEF-ELPN-VLYFSSSACSLNVM--HFRSFVERGIIPFKDESyltng  
 MdUGT71K1 125 LFCV-SMI-DVAKEL-NIPS-YLFLTSNAGYLAFML--HLPIlHE-----KNQIAVEESD  
 AtUGT89A2 131 FFLG-WTH-DLCNQI-GIPR-FAFFSISFFLVSVLQ--FCFENIDLIKSTDPiH-----  
 AtUGT89C1 125 SFLSPWIN-KVADAF-SIKS-ISFLPINAHSISVMW-----  
 AtUGT89B1 128 FFLG-WTK-----NL-GIPR-FDFSPSAITCCILN--TLWIEMPTKINEDDDNEILH--  
 NmUGT89P1 114 FFLG-WTN-SLASQL-GIPR-LVFWPSPQVQRSSLVD--YIWQNDQLSDSDHQIQDNSVIS  
 AtUGT92A1 133 FFLG-WIG-KVCKEV-GVYS-VIFSASGAFGLGCRY--SIWLNLPHKETKQDQFL-----  
 GbUGT92K1 135 IFLG-WTL-DVANRL-GIPR-IMFCTCGAYSTSIYY--SLWAHLPHRQTDSDTFC-----  
 GmUGT92G4 129 MFLG-WVN-NVAKSL-GTRN-LTFTTCGAYGILAYI--SIWSNLPHRKTDSDEFH-----  
 PoUGT90A7 127 GFLS-WTL-ASANKF-RIPR-LAFYGMNMYVGAUSR--DVALNRLLSGPESDDELT---  
 AtUGT90A1 126 GFLW-WTS-ESAAKF-NIPR-FVSYGMNSYSAVSI--SVFKHLLF--TEPEKSDTE  
 AcUGT73J1 118 SLFP-WTA-DIALQF-KIPR-IFHGMAGVFPMYVSA--NIFSHFPLDESKEEFF-----  
 MtUGT73P1 129 MFYP-WSV-DVADEL-GIPR-LICIGGSYFAHSAMN--SIEQFEPHAKVKSNSVSFL---  
 SrUGT73E1 130 FLFP-WTT-DVARRL-NIPR-LVFNNGPGCFYLLCIH--VAITSNILGENEPVSSNTE---  
 CpPGT4 125 MCFP-WTV-DTAAKF-NVPR-IIFHGFSCFCLFCHH--LLGVSKVHENVTSdSE-----  
 AtUGT73C1 127 MCLP-YTN-RIAKNL-GIPK-IIFHGMCCFNLLCTH--IMHQNHEFLETIESDKEYFP---  
 CpPGT2 126 MCLP-YTA-HIAGKF-NIPR-ITLHGTCFCLVCYN--NLFTSKVFSVSSSESEYLV---  
 PjGAT 132 KYLS-WTT-KTAEKI-HVPR-LVFGHGMCCFSLSSH--NIRLYNAHLSVTSdSQPFV---  
 CtiUGT73AE1 128 RYML-WTA-DTAVKH-GLPR-IFDGMNCFKQLCTH--NMYSNLVLDG-----LSDSD  
 CaUGT73AH1 126 KHIM-WTA-KTAKKF-QIPW-IVFDGMSCFNQLCTE--ILHTTKVHENVSESEPFV---  
 PzGAT2 126 KHVF-WTS-DTAKKL-QIPW-IMFDGMSCFTQLCTE--NIYNSKVHESVSSSESSEFV---  
 AcUGT73G1 125 LFLA-WIH-NVAKEL-NIPS-LDFHGSNFSSKCMSh--TVEHNNLLDNSTAEtVL-----  
 MtUGT73K1 124 IIFT-WSE-STAKNL-QIPR-LVFNPISIFDVCMIQ--AIQSHNPESVSDSGPYQ-----  
 GeUGT73F1 126 FIYQ-WVD-ELANKL-NIPR-LAFNGFSLFAICAIESVKAHSLYASG-----  
 AtUGT73B1 136 MFFP-WST-KVAEKf-GVPR-LVFGHGTGYFSLCASHCIRLPKNVATSSEPFV-----  
 GuUGAT 122 MFFP-WAT-DSAAKF-GIPR-IVFHGLGYFPLCVLA--CTRQYKPKQDKVSSYTEPFV---  
 NmUGT73BD1 121 MFFP-WTT-NVAAKY-NIPR-FVFGHGFCLFALCVSE--NIRSYKPKFDVESDSEPIV---  
 NmUGT73BD1 1 -----MTAQFHVVFFP-LM-AQGHILIP

|             |     |                                                                                                                                                   |                                                    |
|-------------|-----|---------------------------------------------------------------------------------------------------------------------------------------------------|----------------------------------------------------|
| AtUGT81A1   | 232 | -----AREIAQG-----LMKYQ <b>P</b> DI I I-----                                                                                                       | -----                                              |
| AtUGT80A2   | 227 | THANFK <b>E</b> FVLTAGLEFY--PLGG-DPKV <b>L</b> AGYMV-----                                                                                         | -----KNKGFLP                                       |
| AtUGT80B1   | 197 | FVR-----AAGVEFY--PLGG-DPRE <b>L</b> AAYMA-----                                                                                                    | -----RNKGLIP                                       |
| OsZOGT3     | 170 | -----LLRENGL-----NHAP <b>E</b> TYMT-----                                                                                                          | -----QE-----                                       |
| OsZOGT1     | 165 | -----LVREHGL-----QFHP <b>V</b> EACMT-----                                                                                                         | -----                                              |
| ZmcisZOG1   | 172 | -----LQFL <b>P</b> ----- <b>P</b> DACM-----                                                                                                       | -----                                              |
| GmUGT79A6   | 169 | -----PPGY <b>P</b> QON-SN <b>I</b> SLKAFEAMDFMFL-----                                                                                             | -----FTRFG--                                       |
| AtUGT79B6   | 158 | -----PPGY <b>P</b> SSKVL <b>L</b> ---RGHE <b>T</b> NSLSF-----                                                                                     | -----LSYFP <b>G</b>                                |
| GmUGT91H9   | 168 | -----PTW <b>L</b> PFT-----TTV <b>H</b> L <b>R</b> PH <b>E</b> I-----                                                                              | -----RRAT <b>S</b> S <b>I</b>                      |
| ZmUGT91L1   | 156 | -----DFG <b>I</b> P-----DPS <b>V</b> L <b>P</b> MF <b>R</b> P-----                                                                                | -----                                              |
| PoUGT95A1   | 190 | -----IPGL <b>P</b> KE-MAV <b>T</b> FADLSR <b>G</b> P <b>Q</b> RRIRPPGG <b>P</b> GKSDGRAGPPN <b>R</b> M <b>R</b> SGSR <b>H</b> G                   | -----                                              |
| MtUGT95B4   | 149 | -----LPGL <b>P</b> YD-MAL---TYS <b>D</b> L <b>K</b> QHL <b>H</b> -----                                                                            | -----DPPPPPP <b>P</b> QH <b>G</b> IPPP <b>P</b> HE |
| PgUGT95B2   | 171 | PEEMALTEFDL <b>K</b> K <b>R</b> PH <b>G</b> --P <b>P</b> HL <b>R</b> NGGG <b>G</b> P <b>G</b> GGG-----                                            | -----APGGGG <b>F</b> PFAP <b>P</b> GR <b>P</b> GP  |
| VvUGT95B6   | 166 | -----LPGL <b>P</b> ED-MAL---TYS <b>D</b> L <b>R</b> GR <b>P</b> H <b>G</b> PPGG <b>P</b> PPGG <b>P</b> SGGG <b>P</b> PPG <b>P</b> ARG <b>P</b> PR | -----                                              |
| AtUGT82A1   | 164 | -----TIV <b>Q</b> PE <b>Q</b> --P <b>L</b> -L-SAED <b>L</b> P <b>W</b> L <b>I</b> G-----                                                          | -----TPKA <b>Q</b> - <b>K</b>                      |
| VpUGT94F1   | 177 | -----RHIS <b>P</b> NT-----K <b>G</b> AD <b>F</b> GG <b>F</b> IL-----                                                                              | -----                                              |
| AtUGT87A1   | 156 | -----VDY <b>I</b> P <b>G</b> L-S <b>P</b> T---RLSD <b>L</b> <b>Q</b> IL <b>H</b> G-----                                                           | -----Y <b>S</b> H <b>Q</b> ---                     |
| AtUGT72C1   | 164 | -----ALL <b>I</b> P <b>G</b> C-SP <b>V</b> K <b>F</b> ERA <b>Q</b> D <b>P</b> R <b>K</b> Y <b>I</b> R-----                                        | -----                                              |
| AtUGT72D1   | 166 | -----PL <b>K</b> I <b>P</b> G <b>C</b> -K <b>P</b> V---G <b>P</b> KE <b>T</b> ME <b>T</b> M <b>L</b> -----                                        | -----DR <b>S</b> G <b>Q</b> Q-                     |
| LjUGT72AD1  | 166 | -----TIE <b>I</b> P <b>G</b> C-I <b>P</b> I---HIT <b>D</b> L <b>P</b> N <b>Q</b> I <b>Q</b> -----                                                 | -----N <b>R</b> Y <b>N</b> E--                     |
| AtUGT72B1   | 150 | -----PL <b>M</b> L <b>P</b> G <b>C</b> -V <b>P</b> V---AG <b>K</b> DF <b>L</b> DP <b>A</b> Q-----                                                 | -----DR <b>K</b> DD--                              |
| VvUGT1      | 166 | -----P <b>V</b> K <b>F</b> P <b>G</b> C-V <b>P</b> V---Q <b>G</b> R <b>D</b> L <b>I</b> D <b>P</b> L <b>Q</b> -----                               | -----DR <b>K</b> N <b>E</b> --                     |
| LjUGT72AH1  | 166 | P-----IE <b>I</b> P <b>G</b> C-I <b>S</b> V---H <b>G</b> K <b>D</b> L <b>P</b> NS <b>I</b> Q-----                                                 | -----N <b>R</b> SS <b>P</b> --                     |
| LjUGT72Z2   | 167 | -----PI <b>Q</b> I <b>P</b> G <b>C</b> -I <b>P</b> I---Q <b>G</b> Q <b>D</b> L <b>P</b> EH <b>F</b> Q-----                                        | -----DR <b>S</b> SL--                              |
| GmUGT72X4   | 166 | -----PI <b>R</b> L <b>P</b> G <b>C</b> -V <b>P</b> V---M <b>G</b> V <b>D</b> L <b>P</b> DP <b>A</b> Q-----                                        | -----DR <b>S</b> SE--                              |
| MtUGT72L1   | 173 | -----PI <b>K</b> V <b>P</b> G <b>C</b> -V <b>P</b> L---H <b>G</b> R <b>D</b> L <b>T</b> I <b>V</b> Q-----                                         | -----DR <b>S</b> S <b>Q</b> --                     |
| PgUGT72BD1  | 168 | -----PL <b>H</b> I <b>P</b> G <b>C</b> -A <b>S</b> I---LYED <b>T</b> VD <b>V</b> Y <b>T</b> -----                                                 | -----DR <b>N</b> D <b>K</b> L <b>L</b>             |
| AtUGT72E1   | 158 | -----P <b>M</b> V <b>M</b> P <b>G</b> C-E <b>P</b> V---R <b>F</b> ED <b>T</b> L <b>E</b> T <b>F</b> L-----                                        | -----DR <b>P</b> NS <b>Q</b> L                     |
| OsUGT706C1  | 166 | -----VLS <b>F</b> S <b>G</b> V <b>P</b> T <b>I</b> ---R <b>A</b> LD <b>M</b> P <b>D</b> T <b>M</b> Q-----                                         | -----DR <b>E</b> S <b>D</b> --                     |
| OsUGT706D1  | 166 | -----LLR <b>F</b> P <b>G</b> V-P <b>P</b> I---PAS <b>D</b> M <b>P</b> SL <b>V</b> Q-----                                                          | -----DR <b>E</b> GR--                              |
| MtUGT88E1   | 171 | -----PI <b>E</b> L <b>P</b> G <b>L</b> -P <b>R</b> L---SK <b>E</b> D <b>Y</b> P <b>D</b> E <b>G</b> K-----                                        | -----DP <b>S</b> SS--                              |
| VpUGT88D8   | 157 | -----Y <b>L</b> E <b>I</b> P <b>G</b> C-P <b>P</b> V---H <b>S</b> L <b>D</b> F <b>P</b> K <b>G</b> M <b>F</b> -----                               | -----FR <b>H</b> T <b>N</b> --                     |
| NmUGT88P1   | 169 | -----Y <b>V</b> H <b>I</b> P <b>G</b> I-P <b>P</b> I---H <b>S</b> L <b>D</b> L <b>P</b> K <b>V</b> L <b>S</b> -----                               | -----N <b>R</b> ST <b>V</b> --                     |
| AtUGT88A1   | 170 | -----T <b>V</b> H <b>I</b> P <b>G</b> V-P <b>P</b> M---K <b>G</b> S <b>D</b> M <b>P</b> K <b>A</b> V <b>L</b> -----                               | -----ER <b>D</b> D <b>E</b> --                     |
| VvGT7       | 167 | -----H <b>L</b> H <b>I</b> P <b>G</b> L-P <b>P</b> V---PAS <b>D</b> M <b>A</b> K <b>P</b> I <b>L</b> -----                                        | -----DR <b>E</b> D <b>K</b> --                     |
| MdUGT88F1   | 172 | -----V <b>F</b> E <b>F</b> P <b>G</b> W <b>K</b> S <b>P</b> L---K <b>A</b> TH <b>M</b> V <b>Q</b> L <b>V</b> L-----                               | -----DR <b>N</b> D <b>P</b> A                      |
| ScUGT5      | 167 | -----K <b>F</b> H <b>I</b> P <b>G</b> L-P <b>P</b> L---P <b>S</b> R <b>H</b> M <b>P</b> Q <b>P</b> V <b>L</b> -----                               | -----N <b>R</b> N <b>D</b> P--                     |
| OsUGT707A2  | 185 | -----A <b>V</b> D <b>L</b> P <b>G</b> L-P <b>P</b> V---P <b>A</b> AL <b>L</b> P <b>T</b> P <b>V</b> M-----                                        | -----K <b>K</b> G <b>C</b> --                      |
| AtUGT71B1   | 164 | -----K <b>F</b> D <b>V</b> P <b>T</b> L-T <b>Q</b> P-F-P <b>A</b> K <b>C</b> L <b>P</b> S <b>V</b> M <b>L</b> -----                               | -----N <b>K</b> K--                                |
| MdUGT71A15  | 177 | -----E <b>L</b> A <b>V</b> P <b>S</b> F <b>I</b> N <b>P</b> Y---P <b>A</b> AV <b>L</b> P <b>G</b> S <b>L</b> L-----                               | -----                                              |
| BvUGT71F1   | 184 | -----E <b>F</b> D <b>V</b> P <b>G</b> F <b>V</b> N <b>R</b> V---P <b>E</b> K <b>V</b> L <b>P</b> AV <b>L</b> I-----                               | -----D <b>K</b> E <b>S</b> --                      |
| Db6-GT      | 172 | K-----E <b>V</b> D <b>V</b> P <b>G</b> F-R <b>N</b> R-V-P <b>C</b> K <b>V</b> L <b>P</b> L <b>P</b> F <b>L</b> -----                              | -----                                              |
| AtUGT71C1   | 184 | -----L <b>N</b> L <b>I</b> P <b>G</b> Y <b>V</b> NS <b>V</b> ---P <b>T</b> K <b>V</b> L <b>P</b> S <b>G</b> L <b>F</b> -----                      | -----M <b>K</b> E--                                |
| AtUGT71C4   | 181 | -----E <b>L</b> P <b>V</b> P <b>G</b> F <b>I</b> NA <b>I</b> ---P <b>T</b> K <b>F</b> M <b>P</b> P <b>G</b> L <b>F</b> -----                      | -----                                              |
| AtUGT71D1   | 174 | -----M <b>L</b> S <b>I</b> P <b>G</b> F <b>V</b> NP <b>V</b> ---P <b>A</b> N <b>V</b> L <b>P</b> S <b>A</b> L <b>F</b> -----                      | -----V <b>E</b> D <b>G</b> --                      |
| FaUGT71W2   | 165 | -----D <b>S</b> I <b>V</b> P <b>S</b> Y <b>V</b> NP <b>V</b> ---P <b>T</b> N <b>V</b> L <b>P</b> G <b>F</b> V <b>F</b> -----                      | -----N <b>N</b> G <b>G</b> --                      |
| MtUGT71G1   | 173 | -----L <b>L</b> N <b>I</b> P <b>G</b> I <b>S</b> N <b>Q</b> V---P <b>S</b> N <b>V</b> L <b>P</b> DA <b>C</b> F-----                               | -----N <b>K</b> D <b>G</b> G--                     |
| MdUGT71K1   | 174 | P-----D <b>W</b> S <b>I</b> P <b>G</b> I <b>V</b> HP <b>V</b> ---P <b>P</b> R <b>V</b> L <b>P</b> AA <b>L</b> T-----                              | -----D <b>G</b> R--                                |
| AtUGT89A2   | 179 | -----L <b>L</b> D <b>L</b> P <b>R</b> A-P <b>I</b> F---K <b>E</b> E <b>H</b> L <b>P</b> S <b>I</b> V <b>R</b> -----                               | -----R <b>S</b> L <b>Q</b> T <b>P</b> S <b>P</b>   |
| AtUGT89C1   | 158 | -----A <b>Q</b> ED <b>R</b> S <b>F</b> F <b>N</b> D-----                                                                                          | -----                                              |
| AtUGT89B1   | 176 | -----F <b>P</b> K <b>I</b> P <b>N</b> C-P <b>K</b> Y---R <b>F</b> D <b>Q</b> I <b>S</b> S <b>L</b> Y <b>R</b> -----                               | -----S <b>Y</b> V <b>H</b> G <b>D</b> P--          |
| NmUGT89P1   | 168 | F <b>P</b> D-----V <b>P</b> NS <b>P</b> A <b>Y</b> --P <b>K</b> -W-Q <b>A</b> C <b>G</b> T <b>S</b> T <b>Q</b> Y-----                             | -----K <b>K</b> G <b>D</b> P--                     |
| AtUGT92A1   | 182 | -----L <b>D</b> D <b>F</b> P <b>E</b> A-G <b>E</b> I---E <b>K</b> T <b>Q</b> L <b>N</b> S <b>F</b> M <b>L</b> -----                               | -----E <b>A</b> D <b>G</b> T <b>D</b> D            |
| GbUGT92K1   | 184 | -----V <b>P</b> D <b>L</b> P <b>H</b> I--R <b>L</b> ---H <b>R</b> S <b>Q</b> L <b>S</b> Q <b>I</b> L <b>A</b> -----                               | -----V <b>S</b> E <b>A</b> S <b>D</b> P--          |
| GmUGT92G4   | 178 | -----V <b>P</b> G <b>F</b> P <b>Q</b> N-Y <b>R</b> F---H <b>K</b> T <b>Q</b> L <b>H</b> R <b>F</b> L <b>Q</b> -----                               | -----A <b>A</b> D <b>G</b> T <b>D</b> D            |
| PoUGT90A7   | 178 | -----V <b>P</b> T <b>F</b> P <b>W</b> I <b>K</b> I <b>T</b> R---N <b>D</b> F <b>D</b> F <b>P</b> L <b>N</b> Q <b>R</b> -----                      | -----D <b>P</b> S <b>G</b> P--                     |
| AtUGT90A1   | 176 | P <b>V</b> T-----V <b>P</b> D <b>F</b> P <b>W</b> I--K <b>V</b> ---K <b>K</b> C <b>D</b> F <b>D</b> H <b>G</b> T <b>T</b> -----                   | -----E <b>P</b> E <b>E</b> S-G                     |
| AcUGT73J1   | 166 | -----M <b>D</b> G <b>L</b> A <b>E</b> K-I <b>K</b> L---Y <b>R</b> K <b>G</b> L <b>P</b> D <b>M</b> F <b>S</b> -----                               | -----                                              |
| MtUGT73P1   | 180 | -----L <b>P</b> G <b>L</b> P <b>H</b> N-V <b>E</b> M---T <b>R</b> L <b>Q</b> L <b>P</b> D <b>W</b> L <b>R</b> -----                               | -----A <b>P</b> N---                               |
| SrUGT73E1   | 181 | -----R <b>V</b> V <b>L</b> P <b>G</b> L--P <b>D</b> R <b>I</b> -E <b>V</b> T <b>K</b> L <b>Q</b> I <b>V</b> G <b>S</b> -----                      | -----S <b>R</b> P <b>A</b> N <b>V</b> D            |
| CpPGT4      | 173 | -----Y <b>F</b> N <b>I</b> P <b>G</b> L--P <b>D</b> H <b>I</b> -Q <b>F</b> T <b>K</b> V <b>Q</b> L <b>L</b> I <b>S</b> -----                      | -----K <b>R</b> D <b>D</b> D--                     |
| AtUGT73C1   | 179 | -----I <b>P</b> N <b>F</b> P <b>D</b> R-V <b>E</b> F---T <b>K</b> S <b>Q</b> L <b>P</b> M <b>V</b> L <b>V</b> -----                               | -----A <b>G</b> D--                                |
| CpPGT2      | 177 | -----V <b>P</b> C <b>L</b> P <b>D</b> K-I <b>E</b> F---T <b>T</b> Q <b>Q</b> V <b>D</b> S <b>S</b> L <b>G</b> -----                               | -----                                              |
| PjGAT       | 183 | -----V <b>P</b> G <b>M</b> P <b>Q</b> R-V <b>E</b> I---T <b>K</b> A <b>Q</b> L <b>P</b> G <b>A</b> F <b>V</b> -----                               | -----T <b>L</b> P--                                |
| CtiUGT73AE1 | 175 | P <b>F</b> I-----L <b>P</b> G <b>L</b> P <b>D</b> R-I <b>E</b> I---T <b>K</b> V <b>Q</b> L <b>P</b> Q <b>E</b> F <b>N</b> -----                   | -----Y <b>S</b> D <b>L</b> G--                     |
| CaUGT73AH1  | 176 | -----V <b>P</b> G <b>L</b> P <b>D</b> V-I <b>E</b> F---K <b>R</b> A <b>Q</b> L <b>P</b> G <b>L</b> F <b>N</b> -----                               | -----P <b>G</b> S <b>N</b> P <b>G</b> S            |
| PzGAT2      | 177 | -----V <b>R</b> G <b>L</b> P <b>D</b> H-I <b>E</b> F---T <b>K</b> A <b>Q</b> L <b>P</b> G <b>L</b> F <b>N</b> -----                               | -----P <b>G</b> S <b>V</b> P--                     |
| AcUGT73G1   | 174 | -----L <b>P</b> N <b>L</b> P <b>H</b> K-I <b>E</b> M---R <b>R</b> A <b>L</b> I <b>P</b> D <b>F</b> R <b>K</b> -----                               | -----V <b>A</b> P <b>S</b> --                      |
| MtUGT73K1   | 173 | -----I <b>H</b> G <b>L</b> P <b>H</b> P-L <b>T</b> L---P <b>I</b> K <b>P</b> S <b>P</b> G <b>F</b> A <b>R</b> -----                               | -----                                              |
| GeUGT73F1   | 169 | -----S <b>F</b> V <b>I</b> P <b>G</b> L-P <b>H</b> P---I <b>A</b> M <b>N</b> A <b>A</b> P <b>P</b> K <b>Q</b> -----                               | -----                                              |
| AtUGT73B1   | 184 | -----I <b>P</b> D <b>L</b> P <b>G</b> D-I <b>L</b> I <b>T</b> E <b>E</b> Q <b>V</b> M <b>E</b> T <b>E</b> E <b>S</b> V-----                       | -----                                              |
| GuUGAT      | 173 | -----V <b>P</b> N <b>L</b> P <b>G</b> E-I <b>T</b> L <b>T</b> K <b>M</b> Q <b>L</b> P <b>Q</b> L <b>P</b> Q <b>H</b> D <b>K</b> -----             | -----                                              |
| NmUGT73BD1  | 172 | -----L <b>P</b> N <b>F</b> P <b>N</b> Q-I <b>E</b> F---S <b>K</b> A <b>Q</b> V <b>P</b> G <b>S</b> D <b>L</b> -----                               | -----G <b>I</b> K <b>D</b> ---                     |
| NmUGT73BD1  | 1   | -----M <b>T</b> A <b>Q</b> F <b>H</b> V <b>V</b> F <b>F</b> P-L <b>M</b> - <b>A</b> Q <b>G</b> H <b>L</b> I <b>P</b> -----                        | -----                                              |

|             |     |            |            |           |          |                       |              |
|-------------|-----|------------|------------|-----------|----------|-----------------------|--------------|
| NtTOGT1     | 171 | -----VPDL  | PHE-IKL    | ---TRTQV  | SPFER    | -----SHEET            | --           |
| BvUGT73A4   | 176 | -----LPHL  | PHE-IEL    | ---TRLQF  | SEELW    | -----KNGG             | --           |
| Db5-GT      | 178 | -----LPFL  | PHE-VKM    | ---TRLQV  | PESMR    | -----KGEET            | --           |
| AtUGT86A1   | 182 | -----IDYV  | PGV-KAI    | ---EPKDI  | MSYLQ    | -----VSDKDVD          |              |
| ZmUFGT1     | 183 | -----LISH  | PGL-ASY    | ---RVRDL  | PDGVV    | -----SGDFN            | --           |
| CteUGT78K6  | 164 | -----LDFL  | PGL-SKL    | ---RVEDV  | PQDML    | -----DVGEKET          |              |
| AtUGT78D1   | 171 | -----LGFIP | PGM-ENY    | ---RVKDI  | PEEVV    | -----FEDLDSV          | --           |
| CoUGT78B3   | 172 | -----LTFIP | PAM-EKV    | ---RAGDL  | PDEIL    | -----KGNLDS           |              |
| MtUGT78G1   | 176 | -----IDVLP | PGF-PEL    | ---KASDL  | PEGVI    | -----KDIDVP           | --           |
| LgUGT78J1   | 165 | I-----QPLI | PGL-EMA    | ---TFRDL  | PPEVF    | -----LDKNPS           | P            |
| CpPGT11     | 169 | IQL-----   | APNMP      | AI-----   | STGEL    | FWTRF                 | -----GDLT    |
| AtUGT83A1   | 183 | -----IQLS  | PGM-PKM    | ---ETDKF  | VWVCL    | -----KNKESQ           | K            |
| FaUGT75T1   | 164 | -----CITID | DGL-PPF    | ---ASDEL  | PSYLL    | -----PTSPHV           |              |
| AtUGT75C1   | 167 | -----PIKLP | PKL-PLI    | ---TTGDL  | PSFLO    | -----PSKA             | --           |
| AtUGT75B1   | 154 | -----VFEL  | PNL-SSL    | ---EIRDLP | SFLLT    | -----PSNTNKG          | G            |
| AtUGT75D1   | 181 | -----SIKLP | PSL-PLL    | ---TVRDI  | PSFIV    | -----SSNVYA           | A            |
| ZmUGT74A1   | 162 | GAAALSEA-  | FLGL       | PEM-----  | ERSEL    | PSFVF                 | -----DHGP    |
| AsUGT74H5   | 159 | -----EEGL  | PAG---     | F-EAEDL   | PFTLT    | -----LPLP             | --           |
| BdUGT74J7   | 174 | -----LRGL  | LSL-EL     | ---EPEDV  | PSFVA    | -----APDSYRL          | L            |
| SrUGT74G1   | 163 | -----TVSV  | PGF-PVL    | ---QRWET  | PLILQ    | -----NHEQIQ           | S            |
| AtUGT74B1   | 165 | -----IRGL  | PSL---     | ---SYDEL  | PSFVG    | -----RHWLTH           | P            |
| RsUGT74R1   | 158 | -----PHGI  | PRL---     | ---EQRDLP | SFIQ     | -----DKENSA           | H            |
| LuUGT74S1   | 164 | -----TLVI  | DGL-PPL    | ---EVSDL  | PSFIW    | -----DDL              | --           |
| AtUGT74F1   | 156 | -----IKDL  | PLL---     | ---ELQDL  | PFTVT    | -----PTGSHL           | L            |
| SgUGT74AC1  | 158 | -----TISLP | PSM-PLL    | ---RPSDL  | PAYDF    | -----DPASTDT          | T            |
| AtUGT74C1   | 161 | -----LASF  | PGF-PLL    | ---SQDDL  | PSFAC    | -----EKGSYP           | P            |
| AtUGT74D1   | 160 | -----DVVL  | PAM-PPL    | ---KGNDL  | PVFLY    | -----DNNLCR           | P            |
| AtUGT74E2   | 160 | -----LASF  | PSF-PML    | ---TANDLP | SFLLC    | -----ESSYP            | P            |
| AtUGT84B1   | 163 | -----LPAL  | PLL---     | ---EVRDL  | PSFML    | -----PSGGAH           | -            |
| DgphBAGT    | 174 | -----SVEL  | PGL-PTL    | ---ESDEL  | PSFLH    | -----PVYSPDK          | K            |
| MtUGT84F1   | 164 | -----DVQL  | NSS-IVL    | ---KYNEI  | PDFIH    | -----                 |              |
| GtUF6CGT1   | 176 | -----DVQL  | PGM-PLL    | ---KYDEV  | PDYLH    | -----PRTYP            | P            |
| PgUGT84A23  | 172 | -----DVQL  | PSM-PLL    | ---KHDEV  | PSFLY    | -----PTTYP            | P            |
| PgUGT84A24  | 171 | -----DVQL  | PCM-PLL    | ---KHDEV  | PSFLY    | -----PTTYP            | P            |
| AtUGT76E1   | 165 | -----DKEF  | PGL-HPL    | ---RYKDL  | PTSFA    | -----GP               | --           |
| AtUGT76D1   | 160 | -----EETV  | PEF-HPF    | ---RFKDL  | PFTAY    | -----                 |              |
| SrUGT76G1   | 179 | -----ASGF  | PML---     | ---KVKDI  | KSAYS    | -----                 |              |
| VvGT15      | 195 | -----HDPV  | PEL-HPL    | ---RFKDL  | PISRL    | -----GDLEA            | --           |
| AtUGT76C1   | 167 | -----DDL   | VPEF-PPL   | ---RKKDL  | SRIMG    | -----TSAQSK           | P            |
| AtUGT76B1   | 163 | -----VPEL  | PYL---     | ---RMKDL  | PWFQT    | -----EDPRS            | --           |
| CsUGT76F1   | 165 | -----VVEL  | PPL---     | ---KIKDL  | PVINT    | -----RDPET            | --           |
| OsUGT709A4  | 180 | -----VRGV  | PGMEGFL    | ---RRRDL  | PSTFR    | -----RHGN             | DH           |
| SrUGT85C2   | 176 | YLDTV----  | IDWV       | PGM-EGI   | ---RLKDF | PLDWS                 | -----TDLNDK  |
| CoUGT85N1   | 178 | YLDTE----  | IDWI       | PAM-KGI   | ---RLKDL | PSFLR                 | -----TTD     |
| MeUGT85K4   | 179 | YLDQP----  | VDFI       | PGM-PNM   | ---KLRDM | PSFIR                 | -----VTDVNDI |
| AtUGT85A1   | 181 | YLEDTV---- | IDFI       | PTM-KNV   | ---KLKDI | PSFIR                 | -----TTNPDDV |
| MtUGT85H2   | 180 | CLETK----  | VDWI       | PGL-KNF   | ---RLKDI | VDFIR                 | -----TTNPNDI |
| MdUGT71K1   | 174 | P-----DWSI | PGIVHPV    | ---PPRVL  | PAALT    | -----DGR              | --           |
| AtUGT89A2   | 179 | -----LLDL  | PRA-PIF    | ---KEEHLP | PSIVR    | -----RSLQTP           | SP           |
| AtUGT89C1   | 158 | -----AQED  | RSFFND     | -----     |          |                       |              |
| AtUGT89B1   | 176 | -----FPKI  | PNC-PKY    | ---RFDQI  | SSLYR    | -----SYVHGDP          | --           |
| NmUGT89P1   | 168 | FPD-----   | VPNS       | PAY--PK-W | ---QACG  | STQY                  | -----KKGDP   |
| AtUGT92A1   | 182 | -----LDDF  | PEA-GEI    | ---EKTQL  | NSFML    | -----EADGTDD          | D            |
| GbUGT92K1   | 184 | -----VPDL  | PHI--RL    | ---HRSQL  | SQILA    | -----VSEASDP          | --           |
| GmUGT92G4   | 178 | -----VPGF  | PQN-YRF    | ---HKTQL  | HRFLQ    | -----AADGTDD          | D            |
| PoUGT90A7   | 178 | -----VPTF  | PWIKITR    | ---NDFDF  | PLNQR    | -----DPSGP            | --           |
| AtUGT90A1   | 176 | PVT-----   | VPDF       | PWI--KV   | ---KKCDF | DHGTT                 | -----EPEES   |
| AcUGT73J1   | 166 | -----MDGL  | AEK-IKL    | ---YRKG   | LPMFS    | -----                 |              |
| MtUGT73P1   | 180 | -----LPGL  | PHN-VEM    | ---TRLQL  | PDWLR    | -----APN              | ---          |
| SrUGT73E1   | 181 | -----RVVL  | PGL--PDRI  | ---EVTKL  | QIVGS    | -----SRPANVD          | D            |
| CpPGT4      | 173 | -----YFNI  | PGL--PDHI  | ---QFTKV  | QLLIS    | -----KRDDD            | --           |
| AtUGT73C1   | 179 | -----IPNF  | PDR-VEF    | ---TKSQ   | LPMLV    | -----AGD              | --           |
| CpPGT2      | 177 | -----VPCL  | PDK-IEF    | ---TTQQL  | VSSLG    | -----                 |              |
| PjGAT       | 183 | -----VPGM  | PQR-VEI    | ---TKAQL  | PGAFF    | -----TLP              | --           |
| CtiUGT73AE1 | 175 | PFI-----   | LPGL       | PDR-IEI   | ---TKVQL | PQEFN                 | -----YSDLG   |
| CaUGT73AH1  | 176 | -----VPGL  | PDV-IEF    | ---KRAQL  | PGLFN    | -----PGSNP            | GS           |
| PzGAT2      | 177 | -----VRGL  | PDH-IEF    | ---TKAQL  | PGLFN    | -----PGSVP            | --           |
| AcUGT73G1   | 174 | -----LPNL  | PHK-IEM    | ---RRAL   | PDFRK    | -----VAPS             | --           |
| MtUGT73K1   | 173 | -----IHGL  | PHP-LTL    | ---PIKPS  | PGFAR    | -----                 |              |
| GeUGT73F1   | 169 | -----SFVI  | PGL-PHP    | ---IAMNA  | APPKQ    | -----                 |              |
| AtUGT73B1   | 184 | -----IPDL  | PGD-ILITEE | QVME      | TEESV    | -----                 |              |
| GuUGAT      | 173 | -----VPNL  | PGE-ITLTKM | QLPQL     | PQHDK    | -----                 |              |
| NmUGT73BD1  | 172 | -----LPNF  | PNQ-IEF    | ---SKAQV  | PGSDL    | -----GIKD             | --           |
| NmUGT73BD1  | 1   | -----      |            |           |          | MTAQFHVVFFP-LM-AQGHLP |              |

|             |     |                                       |                                    |                           |
|-------------|-----|---------------------------------------|------------------------------------|---------------------------|
| AtUGT81A1   | 249 | ---                                   | SVHPLMQHVPLRVLRSKGLLKKIVFTTVIDLS   | -TCH-PTWFH--KLV-----      |
| AtUGT80A2   | 265 | S---                                  | GPSEIPIQR--NQMKDIIY---SLLPAC-KEPD  | -PDSGISFKA--DA-IIANPPA    |
| AtUGT80B1   | 228 | S---                                  | GPSEISKOR--KQLKAIIE---SLLPAC-IEPD  | -LET-ATSF--AQ-IAANPPA     |
| OsZOGT3     | 189 | ---                                   | FLDYASERA--RASESILSGAGILANAS-RALE  | -GDF-IDDLA--ETLAAGG--     |
| OsZOGT1     | 182 | ---                                   | KEFVELISRAEQDEENAASSGILMNTS-RALE   | -AEF-IDEIATHPMFKE-----    |
| ZmcisZOG1   | 182 | ---                                   | SREFVDLVRMEEEEQAPVAGLVMNTC-RALE    | -GEF-LDVVAAQPPFQG-----    |
| GmUGT79A6   | 197 | ---                                   | EKNLTGYERVLQSLGECFSF---IVFKTC-KEIE | -GPY-LDYIE--TQF-----      |
| AtUGT79B6   | 185 | DGTSFYERIMIGL--KNCDV-----ISIRTC-QEME  | -GKF-CDFIE--NQF-----               |                           |
| GmUGT91H9   | 192 | KSDSDTGRMANFDL--RKAYSSCD--MFLRTC-RELE | -GEW-LDYLE--HKY-----               |                           |
| ZmUGT91L1   | 171 | ---                                   | FVETFKRCK-----VIAARSS-FELE         | -PES-LPLMT--KIL-----      |
| PoUGT95A1   | 239 | PGGGPSPGPGQKP--RWVDEVDGSIALLINTC-DDLE | -HVF-INYMA--EQT-----               |                           |
| MtUGT95B4   | 187 | CGPSSMMGPPKLGQPPWLDEIQETIALMINTC-DDLE | -HPF-INYIA--NHV-----               |                           |
| PgUGT95B2   | 221 | K---                                  | FMGPPKPGQEPWVDDVADSVALLFNTC-DDLE   | -GPF-IEYLA--DR-VG-----    |
| VvUGT95B6   | 212 | SGPKFGGPPKPGHQPWVDETASIALMINTC-DDLE   | -RPF-IEYVA--HQT-----               |                           |
| AtUGT82A1   | 190 | K---                                  | RFKFWQRTL--ERTKS-LR--WILTSSFKDEYED | -VDVNHKASYSK--KS--NDLNKEN |
| VpUGT94F1   | 194 | ---                                   | GSLNSSSE--IILLKTS-KELE             | -KKY-IDYLSFLCR-----       |
| AtUGT87A1   | 180 | ---                                   | VFNIFKKSF--GELYKAKY--LLFPSA-YELE   | -PKA-IDFFT--SKF-----      |
| AtUGT72C1   | 187 | ---                                   | ELAESQRIGDEVIT-AD--GVFVNTW-HSLE    | -QVT-IGSFL--DPENLGRVMRG   |
| AtUGT72D1   | 192 | ---                                   | YKECVRAGL--EVPMSD--GVLVNTW-EELQ    | -GNT-LAALR--EDEELSRVMK-   |
| LjUGT72AD1  | 191 | ---                                   | DYKVFLSN--KRFYL-AD--GVIINSF-FDLE   | -PET-FRALQ--ENQGTSPPSV-   |
| AtUGT72B1   | 175 | ---                                   | AYKWLHNT--KRYKEAEG--ILVNTF-FELE    | -PNA-ICALQ--EPLGDK-----   |
| VvUGT1      | 191 | ---                                   | AYKVVVHHA--KRYKTGP--GIIVNSF-MDLE   | -PGA-FKALKEIEPDY-----     |
| LjUGT72AH1  | 191 | ---                                   | AYKFYLRR--QQLHI-TD--GILVNSF-TEME   | -PEA-MKAIS--QNGGA-----    |
| LjUGT72Z2   | 192 | ---                                   | AYDLILKRC--KRFSLAD--GFLVNSF-LELE   | -EGT-VKALQEQRNGRNGENRGN   |
| GmUGT72X4   | 191 | ---                                   | IYNNFLERA--KAMATAD--GILINTF-LEME   | -PGA-IRALQEFENG-----      |
| MtUGT72L1   | 198 | ---                                   | AYKYFLQHV--KLSLAFADG--VLVNSF-LEME  | -MGP-INALT--EEGSGN-----   |
| PgUGT72BD1  | 195 | ---                                   | HDDYVRIGR--RLAE-AD--GILINTW-ESLE   | -PKT-LQALR--DPKAFGRFSQ-   |
| AtUGT72E1   | 184 | ---                                   | YREFVPGFS--VFPT-CD--GIIVNTW-DDME   | -PKT-LKSLQ--DPKLLGRIAG-   |
| OsUGT706C1  | 191 | ---                                   | VGTTRIHHC--SRMAE-AR--GILVNSF-DWLE  | -TRA-LKAIR--GGLCLPSGRSV   |
| OsUGT706D1  | 191 | ---                                   | FYKARVKLY--ARAME-AS--GVLNTY-EWLE   | -ARA-MGALR--EGA-CSPDRPT   |
| MtUGT88E1   | 196 | ---                                   | SYQVLLQSA--KSLRE-SD--GIIVNTF-DAIE  | -KKA-ICALR--NGLCVPDGT-    |
| VpUGT88D8   | 182 | ---                                   | THNHFLDTA--RNMKANG--ILVNSF-DALE    | -YRS-KAALL--NGICVPNGPT-   |
| NmUGT88P1   | 194 | ---                                   | LYKELINTA--NQMAKCSG--ILINAF-ETLE   | -PKA-IKALK--EGLCTPGMPT-   |
| AtUGT88A1   | 195 | ---                                   | YDVVFIMFG--KQLSKSSG--IIINTF-DALE   | -NRA-IKAIT--EELCF-----    |
| VvGT7       | 192 | ---                                   | AYELFVNMS--IHLPRSAG--IIVNTF-EALE   | -PRA-VKTI--DGLCVLDGPT-    |
| MdUGT88F1   | 199 | ---                                   | YSDMIYFCS--HLPK-SN--GIIVNTF-EELE   | -PPSV-LQAI--GGLCVPDGT-    |
| ScUGT5      | 192 | ---                                   | AYHDVLYFS--HHLARSSG--IIVNTF-DGLE   | -PIA-LKAIT--DGLCIPDIPT-   |
| OsUGT707A2  | 209 | ---                                   | NYEWLVYHG--SRFMEAA--GIIVNTV-AELE   | -PAV-LEAIA--DGRCVPGRRV-   |
| AtUGT71B1   | 188 | ---                                   | WFPYVLRGA--RSFA-TK--GILVNSV-ADME   | -PQA-LSFFS--GGNGTNI--     |
| MdUGT71A15  | 198 | ---                                   | DMESTKSTL--NHVSKYKQTKGILVNTF-MELE  | -SHA-LHYLD--SGDKI-----    |
| BvUGT71F1   | 209 | ---                                   | GVPMLLNLV--RGLRRSKG--ILVNSF-TELE   | -TSG-VQALL--DQATEGGS--    |
| Db6-GT      | 194 | ---                                   | EKDFLVKRG--RRFR-SN--GILVNTS-NELE   | -SYA-IQTL--EQ-AKDNKI-     |
| AtUGT71C1   | 208 | ---                                   | TYEPWVELA--ERFPEAKG--ILVNSY-TALE   | -PNG-FKYFDRCPDNY-----     |
| AtUGT71C4   | 202 | ---                                   | NKEAYEAYV--ELAPRFADAKGILVNSF-TELE  | -PHP-FDYFS--HLEKF-----    |
| AtUGT71D1   | 199 | ---                                   | YDAYVKLAI--LFTK-AN--GILVNSF-FDIE   | -PYS-VNHFL--QEQNY-----    |
| FaUGT71W2   | 190 | ---                                   | YVSFASHAR--RFKE-TK--GVIINTL-VELE   | -SHAV-HSIFR--VGEQDQSDQPW  |
| MtUGT71G1   | 199 | ---                                   | YIAYYKLAE--RFRD-TK--GIIVNTF-SDLE   | -QSS-IDALY--DHDEKI-----   |
| MdUGT71K1   | 199 | ---                                   | LSAYIKLAS--RFRE-TR--GIIVNTF-VELE   | -THA-ITLFS--NDD-RV-----   |
| AtUGT89A2   | 207 | DLES                                  | IKDFSMNLL-----SY--GSVFNSS-EILE     | -DDY-LQYVK--QRMGH-----    |
| AtUGT89C1   | 168 | ---                                   | LETATTESY-----GLVNSF-YDLE          | -PEF-VETVK--TRFLNH-----   |
| AtUGT89B1   | 203 | ---                                   | AWEFIRDSF--RDVA-SW--GLVNSF-TAME    | -GVY-LEHLK--REMGH-----    |
| NmUGT89P1   | 195 | ---                                   | SWEFFKNGV--LANTQ-SW--GAIYNSF-RDLE  | -GVY-IDYIK--KKM-GH-----   |
| AtUGT92A1   | 209 | ---                                   | WSVFMKKII--PGWSD-FD--GFLFNTV-AEID  | -QMG-LSYFR--RIT-----      |
| GbUGT92K1   | 210 | ---                                   | WTLWLKRN--SCNLSSW--GTIFNTF-EDLE    | -HDF-LDYFR--RIT-----      |
| GmUGT92G4   | 205 | ---                                   | WSRFLVPQI--QLSMKSD--GWICNTI-EKIE   | -PLG-LKLLR--NYL-----      |
| PoUGT90A7   | 204 | ---                                   | YMDFIMETV--IASANSY--GLITNSF-YELE   | -PLF-LDYLN--REA-----      |
| AtUGT90A1   | 204 | A---                                  | ALELSMDQI--KSTTT-SH--GFLVNSF-YELE  | -SAF-VDYNN--NS-GDK-----   |
| AcUGT73J1   | 186 | ---                                   | NIPFLITMG--EAEAKSY--GVVNTF-REME    | -PTY-VDFYK--GT-----       |
| MtUGT73P1   | 203 | ---                                   | GTYLMKMI--KDSEKKS--GSLFDSY-YEIE    | -GTY-EDYYK--IAM-----      |
| SrUGT73E1   | 209 | E---                                  | MGSWLRAVE--AEKA-SF--GIVVNTF-EELE   | -PEYVEEYKT--VKD-----      |
| CpPGT4      | 199 | ---                                   | RKELREQIL--AADKK-TY--GAIINTF-EELE  | -SPFIENYKK--AKQ-----      |
| AtUGT73C1   | 202 | ---                                   | WKDFLDGTM--EGDN--GVIINTF-EELE      | -PAYVRDYKK--VKA-----      |
| CpPGT2      | 197 | ---                                   | SRFNVFQKM--GAADGTY--GVIINTF-EELE   | -PAYIKYKK--IRH-----       |
| PjGAT       | 206 | ---                                   | GLDDIRDQM--RAESSAY--GVVNSF-SELE    | -QGCSEYK--AIA-----        |
| CtiUGT73AE1 | 203 | ---                                   | TKEQLERVR--ETEAT-AY--GIVINSF-EELE  | -QEY-VNELK--KVKNG-----    |
| CaUGT73AH1  | 203 | A---                                  | NVNDIREQI--RATEVGAY--GVVINSF-EELE  | -HDY-VREFKKIKE-----       |
| PzGAT2      | 202 | ---                                   | AIDEIREQV--RATEVGAY--GVVINSF-EELE  | -QDY-VDEFK--KVR-----      |
| AcUGT73G1   | 198 | ---                                   | VFQLLIKQ--KEAEKLSY--GLIINSF-YELE   | -PGY-VDYFR--NVV-----      |
| MtUGT73K1   | 193 | ---                                   | LTESLIEAE-----NDSHGVIINSF-AELD     | -EGY-TEYYE--NLT-----      |
| GeUGT73F1   | 189 | ---                                   | MSDFLESML--ETELK-SH--GLVNNF-AELD   | -GEEY-IEHYE--KTT-----     |
| AtUGT73B1   | 207 | ---                                   | MGRFMKAIR--DSERDSF--GVLVNSF-YELE   | -QAY-SDYFK--SFV-----      |
| GuUGAT      | 196 | ---                                   | VFTQLLEES--NESELKSF--GVIINSF-YELE  | -PVY-ADHYR--NEL-----      |
| NmUGT73BD1  | 196 | ---                                   | GATELKFQI--NEADITSY--GIIINSF-NELE  | -KDY-VDYFR--NVC-----      |
| NmUGT73BD1  | 1   | ---                                   | -----                              | -MTAQFHVVFP-LM-AQGHLP     |



|             |     |                       |    |                                        |
|-------------|-----|-----------------------|----|----------------------------------------|
| AtUGT81A1   | 293 | -----TRCYC--          | PS | TEVAKRAQKAGLETSQIKVYGLPVRPSFVKPVRPKVEL |
| AtUGT80A2   | 311 | YGHTHVAEALKIPIHVFFTMP | -  | WTPTSEFPHPPLSRVKQPA-----GYRLSYQIVDSL   |
| AtUGT80B1   | 274 | YGHVHVAEALGVPIHIFFTMP | -  | WTPTSEFPHPPLSRVKQPA-----AYWLSYIVVDL    |
| OsZOGT3     | 234 | -----KKLFAIGP         | -  | LNPLLNTGSSEQGRRRHE-----CLDW            |
| OsZOGT1     | 228 | -----LKLFAAGP         | -  | LNPLLDATARTPGQTRHE-----CMDW            |
| ZmcisZOG1   | 229 | -----QRFFAVGP         | -  | LNPLLLDADAPTTPPGQA-----RHECLEW         |
| GmUGT79A6   | 237 | -----RKPVLLSGP        | -  | LVPEPSTDVLEEK-----WSKW                 |
| AtUGT79B6   | 224 | -----QRKVLLTGP        | -  | MLPEPDNSKPLEDQWRQ-----W                |
| GmUGT91H9   | 235 | -----KVPVVPVGL        | -  | VPPSIQIRDVEEEDNPNP-----WVKIKDW         |
| ZmUGT91L1   | 202 | -----GKPVIPVGL        | -  | LPPAPAGGNTQRDDSA-----LSW               |
| PoUGT95A1   | 284 | -----KLPVWVGP         | -  | LLPEQFWKSAGELLHDHE--MRSNHKSNYTEDEVVQW  |
| MtUGT95B4   | 234 | -----KKPVCVGP         | -  | LLPGQYWKSSGSIHDRD--FRSNRLSNITEEEVIQW   |
| PgUGT95B2   | 266 | -----KPVWVGP          | -  | LLPEQYWRASAGSLLHDRE--IRTNRKSSITEDEVIQW |
| VvUGT95B6   | 259 | -----GIPVWVGP         | -  | LLPDQYWKSSGSIHDRD--IRPNKSSCTEEEEVIQW   |
| AtUGT82A1   | 238 | NGQN-----PQILHLGP     | -  | LHNQEATNNITITKTSF-----WEEDMSCLGW       |
| VpUGT94F1   | 225 | -----KQIIPVGL         | -  | LIANSEDKDEPE-----IMQW                  |
| AtUGT87A1   | 218 | -----DFPVYSTGP        | -  | LIPLEELSVGNENRELD-----YFKW             |
| AtUGT72C1   | 233 | -----VPVYPVGP         | -  | LVRPAEPGLKHG-----VLDW                  |
| AtUGT72D1   | 236 | -----VPVYPIGP         | -  | IVRTNQHVDPKNS-----IFEW                 |
| LjUGT72AD1  | 236 | -----PHVYPVGP         | -  | FIVQKESYDESHGNEDET-----DEYIRW          |
| AtUGT72B1   | 216 | -----PPVYPVGP         | -  | LVNIGKQEAQTEESE-----CLKW               |
| VvUGT1      | 232 | -----PPVYPVGP         | -  | LTRSGSTNGDDGSE-----CLTW                |
| LjUGT72AH1  | 232 | -----PQVHPIGP         | -  | ITQTSWNNKNCSE-----CLLW                 |
| LjUGT72Z2   | 240 | RGKNRGNRD---SPVFLVGP  | -  | VIQTGPSSEPKESESEY-----CVRW             |
| GmUGT72X4   | 231 | -----KIRLYPVP         | -  | ITQKGASNEADESDK-----CLRW               |
| MtUGT72L1   | 239 | -----PSVYPVGP         | -  | IIQTVTGSVDDANGLE-----CLSW              |
| PgUGT72BD1  | 239 | -----VRILPIGP         | -  | LVSGFQSGSSQPKDD-----ILQW               |
| AtUGT72E1   | 228 | -----VPVYPIGP         | -  | LSRPVDPKTNHP-----VLDW                  |
| OsUGT706C1  | 237 | -----PAIYCVGP         | -  | LVDGGKLENDAR-----HECLEW                |
| OsUGT706D1  | 236 | -----PPVYCVGP         | -  | LVASGEEEGGGVVR-----HACLAW              |
| MtUGT88E1   | 241 | -----PLLEFCIGP        | -  | VVSTSCEEDKSG-----CLSW                  |
| VpUGT88D8   | 227 | -----PQVLFVAP         | -  | LVTGMNSRKGDE-----HECLSW                |
| NmUGT88P1   | 239 | -----PPVYCVGP         | -  | LIASGDKGNVNDAHGHEI-----LTW             |
| AtUGT88A1   | 235 | -----RNIYPIGP         | -  | LIVNGRIEDRNDKAVS-----CLNW              |
| VvGT7       | 237 | -----SPIFCIGP         | -  | LIAADDRSGGGGGGGGS-----GIPECLTW         |
| MdUGT88F1   | 244 | -----PPVYYVGP         | -  | LIEEEKELSKDADAAEKE-----DCLSW           |
| ScUGT5      | 237 | -----PPIYNI           | -  | LIAADATKPADQNLKHS-----LSW              |
| OsUGT707A2  | 254 | -----PAIYTVGP         | -  | VLSFKTPPEKPHE-----CVRW                 |
| AtUGT71B1   | 231 | -----PPVYAVGP         | -  | IMDLESSDEEKRE-----ILHW                 |
| MdUGT71A15  | 241 | -----PPVYVGP          | -  | LNLKSSDEDKASD-----ILRW                 |
| BvUGT71F1   | 253 | -----PAIYVGP          | -  | LLELDSGSQGEDHVS-----ILQW               |
| Db6-GT      | 237 | -----PPVYVGP          | -  | LLELNSKSRCGTKEDEEV-----SIMRW           |
| AtUGT71C1   | 249 | -----PTIYPIGP         | -  | LCSNDRPNLDSSERDRI-----ITW              |
| AtUGT71C4   | 245 | -----PPVYVGP          | -  | LISLKDRAHPNEEAVDR-----DQIVGW           |
| AtUGT71D1   | 238 | -----PSVYAVGP         | -  | IFDLKAQHPPEQDLTRRD-----ELMKW           |
| FaUGT71W2   | 236 | -----PAVYVGP          | -  | LIDTKGEHQVRSRDR-----IMEF               |
| MtUGT71G1   | 239 | -----PPIYAVGP         | -  | LIDLKGPQNPKLDQAQHD-----LILKW           |
| MdUGT71K1   | 238 | -----PPVYVGP          | -  | VIDLDDGQEHSLDQAQR-----DKIKW            |
| AtUGT89A2   | 246 | -----DRVYVIGP         | -  | LCSIGSLKSNSSGVDPS-----LISW             |
| AtUGT89C1   | 202 | -----HRIWTVGP         | -  | LFPFKAGVDRGGQSSIPP-----AKVSAW          |
| AtUGT89B1   | 243 | -----DRVWAVGP         | -  | LIPLSGDNRRGGPTSVSD-----HVMWSW          |
| NmUGT89P1   | 235 | -----GRVWAVGP         | -  | LIPANDASKRGGSCVMP-----DDVMTW           |
| AtUGT92A1   | 247 | -----GVPVWPVGP        | -  | VLKSPDKKVGSRSTEEA-----VKS              |
| GbUGT92K1   | 248 | -----GRPVPVGP         | -  | LPLTGTLTKTKIAWRGN-----ESAVADETCLQW     |
| GmUGT92G4   | 243 | -----QLPVWVGP         | -  | LPPASLMGSKHRSGKE-----TGIALDACLMEW      |
| PoUGT90A7   | 242 | -----KPKAWCVGP        | -  | LCLAADHGS DHKPKW-----VEW               |
| AtUGT90A1   | 245 | -----PKSWCVGP         | -  | LCLTDPKQGSAKPA-----WIHW                |
| AcUGT73J1   | 223 | -----KKAWCIGP         | -  | LSLANKLDEEKTAGWIAE-----KEEVKEKIVKW     |
| MtUGT73P1   | 242 | -----GSKSWSVGP        | -  | VSLWMNKDSDKAGRGHG-----KEEDEEEGVKWK     |
| SrUGT73E1   | 248 | -----KKMWCIGP         | -  | VSLCNKTGPDLAERGNKA-----AITEHNCLKW      |
| CpPGT4      | 238 | -----GKVWRIGP         | -  | ASLCNKEPIDKAERGRTA-----SIDVPECLTW      |
| AtUGT73C1   | 241 | -----GKIWSIGP         | -  | VSLCNKLGEDQAERGNKA-----DIDQDECIKW      |
| CpPGT2      | 238 | -----DKVWCIGP         | -  | VSLCNKEYSDKAQRGNKA-----SVDEHQCLKW      |
| PjGAT       | 246 | -----KKVWCIGP         | -  | VSLCNKNDLDFKFERGNKA-----SIDETLCTEW     |
| CtiUGT73AE1 | 243 | -----KVWCLGP          | -  | LSLTNNNDLGKSVRGNS-----SIDEQRIVKW       |
| CaUGT73AH1  | 244 | -----GKVWCVGP         | -  | LSLCNTDDIDKAQRGNV-----AMDQQHKCLQW      |
| PzGAT2      | 241 | -----RDKVWCVGP        | -  | LSLNNENMLDKAQRGHNN-----ASIDGNKCLQW     |
| AcUGT73G1   | 236 | -----GRKAWHVP         | -  | LNLNDKNVNTFDRGSKSA-----IDEASCLSW       |
| MtUGT73K1   | 228 | -----GRKAWHVP         | -  | TSLMVEIPKKKVSTEN-----DSSITKHQSLTW      |
| GeUGT73F1   | 228 | -----GHRAWHLGP        | -  | VSLIRRTSQEKAERGEKS-----VVSVHECLSW      |
| AtUGT73B1   | 245 | -----AKRAWHIGP        | -  | LSLGNRFEEKAERGKKA-----SIDEHECLKW       |
| GuUGAT      | 235 | -----GRRAWHLGP        | -  | VSLCSRDETEEKSRRGREA-----AIDENECLKW     |
| NmUGT73BD1  | 235 | -----GRRAWLLGP        | -  | LSLINRNKDKTLIDEHE-----CLKW             |
| NmUGT73BD1  | 1   | -----                 | -  | -----MTAQFHVVFFP-LM-AQGHILIP           |

|             |     |                 |                      |                     |        |
|-------------|-----|-----------------|----------------------|---------------------|--------|
| NtTOGT1     | 235 | -----GRRAWAIGP  | -LSMCNRDIEDKAERGKKS  | -----SIDKHE         | CLKW   |
| BvUGT73A4   | 241 | -----GRRAWNIIGP | -VSLYNRSNEEKAQRGKQA  | -----SIDEHE         | CLKW   |
| Db5-GT      | 242 | -----GRRAWHIGP  | -VSLCNRSIEDKAQRGRQT  | -----SIDEDE         | CLKW   |
| AtUGT86A1   | 250 | -----QPVYAIIGP  | -VFSTDSVPTSLWAESD    | -----               | CTEW   |
| ZmUFGT1     | 250 | -----PNCVPFPGP  | -YHLLLAEDDADTAAPADP  | -----HG             | CLAW   |
| CteUGT78K6  | 231 | -----QSLLYVVP   | -LPCPQLLLPEIDSNG     | -----               | CLSW   |
| AtUGT78D1   | 236 | -----KRFLNIAP   | -LTLLSSTSEKEMRDPHG   | -----               | CFAW   |
| CoUGT78B3   | 237 | -----QTCLTVGP   | -FTIVAPSISDQHDPHG    | -----               | CLPW   |
| MtUGT78G1   | 240 | -----KLLLNVGP   | -FNLTTSPQRKVSDEHG    | -----               | CLEW   |
| LgUGT78J1   | 231 | -----RHFLNIIGP  | -SILPSP1ADDKSG       | -----               | CLSW   |
| CpPGT11     | 231 | -----PELLPIIGP  | -LLASNRLGNSAGYFLPED  | -----SK             | CVEW   |
| AtUGT83A1   | 245 | -----PNIVPIIGP  | -IGWAHSLEEGSTSLGSFL  | -----PHDRD          | CLDW   |
| FaUGT75T1   | 231 | -----NLITVGP    | -LIRSAEVCDDLFDKSGDD  | -----               | YLOW   |
| AtUGT75C1   | 231 | -----KLKMIPIGP  | -LVSSSEGKTDLFKSSDED  | -----               | YTKW   |
| AtUGT75B1   | 220 | -----DMVAVGP    | -LPTEIFSGSTNKSVKDQ   | -----SSSYTL         | CLW    |
| AtUGT75D1   | 248 | -----KIVPVG     | -LTLTRTDFSSRGE       | -----               | YIEW   |
| ZmUGT74A1   | 231 | -----LKARAIIGP  | -CVPLPTAGRTAGANGRIT  | -----YGANLVKPEDA    | CTKW   |
| AsUGT74H5   | 218 | -----WGAKTVGP   | -TVPSAYLDKRITDDVSYG  | -----FHLYTPMTATTKAW |        |
| BdUGT74J7   | 237 | -----WRVKTIGP   | -TLPSFYLDLDDRLPSNKTY | -----GFDLFDSTAP     | CMAW   |
| SrUGT74G1   | 228 | -----WNLKVIIGP  | -TLPSMYLDKRLDDDDKNG  | -----FNLYKANHHE     | CMNW   |
| AtUGT74B1   | 229 | -----MKATLIGP   | -MIPSAYLDDRMEDDKDYG  | -----ASLLKPISEK     | CMEW   |
| RsUGT74R1   | 219 | -----WQVLTIGP   | -TIPSMYLDKCVKDDRSYG  | -----LNLFKPNRES     | CRDW   |
| LuUGT74S1   | 228 | -----INFRTIGP   | -TIPSFYLDKQIPDDKDYD  | -----ISIFNPQNOT     | CMNW   |
| AtUGT74F1   | 217 | -----CPVLTIGP   | -TVPSMYLDQQIKSDNDYD  | -----LNLFDLKEAAL    | CTDW   |
| SgUGT74AC1  | 223 | -----RPVKTIGP   | -TVPSAYLDKRVENDKHYG  | -----LSLFKPNEDV     | CLKW   |
| AtUGT74C1   | 225 | -----WPVKNIIGP  | -VVPKFLDNRLPEDKDYE   | -----LENSKTEPDES    | VLKW   |
| AtUGT74D1   | 224 | -----WPVKNIIGP  | -MIPSMYLDKRLAGDKDYG  | -----INLFNAQVNE     | CLDW   |
| AtUGT74E2   | 224 | -----WPVLNIIGP  | -TVPSIYLDKRLSEDKNYG  | -----SFLFNKVVE      | CMEW   |
| AtUGT84B1   | 223 | -----KPVPIIGP   | -LVSPFLLGDGEEETLDGK  | -----NLDFCKSDDC     | CMEW   |
| DgPHBAGT    | 241 | -----PIIRPIIGP  | -LYKWKEEKDVRGDMWSAA  | -----               | EECIEW |
| MtUGT84F1   | 229 | -----IAIRPVG    | -LFKNPKANGASNNILG    | -----DFTKSNDDCNI    | IEW    |
| GtUF6CGT1   | 240 | -----CPIKPIIGP  | -LFKIPKDPSSNGITGNFM  | -----KVDD           | CKEW   |
| PgUGT84A23  | 236 | -----CPIKTVGP   | -LFKNPKAPNTTVKGFDMK  | -----ADD            | CIGW   |
| PgUGT84A24  | 235 | -----CPIKTVGP   | -LFKNPKAPNAVVRGDFMK  | -----ADD            | CISW   |
| AtUGT76E1   | 227 | -----QVPVYPIGP  | -LHIAASAPSSLLEEDRS   | -----               | CLEW   |
| AtUGT76D1   | 222 | -----GVPVYVPGP  | -LHMTNSAMSCPSLFEEER  | -----N              | CLEW   |
| SrUGT76G1   | 239 | -----APSFLI     | -LPKHLTASSSSLLDHDRT  | -----               | VFQW   |
| VvGT15      | 257 | -----QVPFFPIGP  | -LHKLAPPSSSSLLEEDSS  | -----               | CITW   |
| AtUGT76C1   | 233 | -----IPIFPIGP   | -FHIHDVPASSSSLLEPD   | -----QS             | CIPW   |
| AtUGT76B1   | 223 | -----PVPLFCIGP  | -FHRYVSASSSSLLAHDMT  | -----               | CISW   |
| CsUGT76F1   | 225 | -----SIPIFPIGP  | -FHICIPASPSLLTQDQS   | -----               | CIAW   |
| OsUGT709A4  | 249 | -----RDVFAVGP   | -LHAMSPAPAAATSLWRED  | -----DG             | CMAW   |
| SrUGT85C2   | 245 | -----NHIYTIIGP  | -LQLLLDQIPEEKKQTGIT  | -----SLHGYSLVKPEPE  | CFQW   |
| CoUGT85N1   | 248 | -----PQLYTIIGP  | -LSMLCDHMLQPD SKLCEA | -----SLWEEDTS       | CLEW   |
| MeUGT85K4   | 249 | -----SKNIYTVGP  | -FILLEKGIPEIKSKAFRS  | -----SLWKEDLS       | CLEW   |
| AtUGT85A1   | 252 | -----PPVYSVGP   | -LHLLANREIEEGSEIGMM  | -----SSNLWKEEME     | CLDW   |
| MtUGT85H2   | 250 | -----PSIYPIGP   | -LPSLLKQTPQIHQLDSDL  | -----SNLWKEDTE      | CLDW   |
| MdUGT71K1   | 238 | -----PPVYVPGP   | -VIDLDDGQEHNSLDQAQR  | -----DKI            | IKW    |
| AtUGT89A2   | 246 | -----DRVYVIGP   | -LCSIGSGLKSNSGSDVPS  | -----               | LLSW   |
| AtUGT89C1   | 202 | -----HRIWTVGP   | -LPLFKAGVDRGGQSSIPP  | -----AKVSAW         |        |
| AtUGT89B1   | 243 | -----DRVWAVGP   | -IIPLSGDNRRGGPTSVSD  | -----HVMSW          |        |
| NmUGT89P1   | 235 | -----GRVWAVGP   | -LPLPANDASKRGGSCVMP  | -----DDVMTW         |        |
| AtUGT92A1   | 247 | -----GVPVWPVGP  | -VLKSPDKKVGSRSTEEA   | -----VKS            | SW     |
| GbUGT92K1   | 248 | -----GRPVPVGP   | -ILPLTGTLTKTKIAWRGN  | -----ESAVADET       | CLQW   |
| GmUGT92G4   | 243 | -----QLPVWAVGP  | -LPPASLMGSKHRSGKE    | -----TGIALDA        | CMEW   |
| PoUGT90A7   | 242 | -----KPKAWCVGP  | -LCLAADHGS DHKPKW    | -----               | VEW    |
| AtUGT90A1   | 245 | -----PKSWCVGP   | -LCLTDPPKQGSAKPA     | -----WIHW           |        |
| AcUGT73J1   | 223 | -----KKAWCIGP   | -LSLANKLDEEKTAGWIAE  | -----KEEVKEKIVK     | W      |
| MtUGT73P1   | 242 | -----GSKSWSVGP  | -VSLWMNKDSDSKAGRGHG  | -----KEEDEEEGV      | VLKW   |
| SrUGT73E1   | 248 | -----KKMWCIGP   | -VSLCNKTGPD LAERGNKA | -----AITEHN         | CLKW   |
| CpPGT4      | 238 | -----GKVWRIIGP  | -ASLCNKEPIDKAERGRTA  | -----SIDVPE         | CLTW   |
| AtUGT73C1   | 241 | -----GKIWSIGP   | -VSLCNKLGEDQAERGNKA  | -----DIDQHE         | CLKW   |
| CpPGT2      | 238 | -----DKVWCIGP   | -VSLSNKEYSDKAQRGNKA  | -----SVDEHQ         | CLKW   |
| PjGAT       | 246 | -----KKVWCIGP   | -VSLCNKDNLDKFERGNKA  | -----SIDETL         | CTEW   |
| CtiUGT73AE1 | 243 | -----KVWCLGP    | -LSLTNNNDLGKSVRGNS   | -----SIDEQRIVK      | W      |
| CaUGT73AH1  | 244 | -----GKVWCVGP   | -LSLCNTDDIDKAQRGNV   | -----AMDQQHK        | CLQW   |
| PzGAT2      | 241 | -----RDKVWCVGP  | -LSLNNENMLDKAQRGHNN  | -----ASIDGNK        | CLQW   |
| AcUGT73G1   | 236 | -----GRKAWHVG   | -LNLNDKNVNTFDRGSKSA  | -----IDEAS          | CLSW   |
| MtUGT73K1   | 228 | -----GRKVWHVGP  | -TSLMVEIPKKKVSTEN    | -----DSSITKHQS      | CLTW   |
| GeUGT73F1   | 228 | -----GHRAWHLGP  | -VSLIRRTSQEKAERGEKS  | -----VVSVHE         | CLSW   |
| AtUGT73B1   | 245 | -----AKRAWHIGP  | -LSLGNRKFEEKAERGKKA  | -----SIDEHE         | CLKW   |
| GuUGAT      | 235 | -----GRRAWHLGP  | -VSLCSRDETEEKSRRGREA | -----AIDENE         | CLKW   |
| NmUGT73BD1  | 235 | -----GRRAWLLGP  | -LSLINRNKDKTLIDEHE   | -----               | CLKW   |
| NmUGT73BD1  | 1   | -----           | -----MTAQFHVVFFP     | -LM-AQGH            | LIP    |



|             |     |   |            |                   |              |             |                             |
|-------------|-----|---|------------|-------------------|--------------|-------------|-----------------------------|
| AtUGT81A1   | 338 | R | -----REL   | GMDENLPAVLLMG     | ---GGEGMGPIE | ---ATA      | -----RALADALYD              |
| AtUGT80A2   | 364 | L | GIRDMVNDLR | KKKLKLRPVTYL      | SGTQGGSGS    | NIPH---     | GYMWSPHLVPKPKDWGPOI         |
| AtUGT80B1   | 327 | W | SIRTYINDFR | KRKLNLAPAIYF      | STYHQSIS     | HLPT---     | GYMWSPHVVPKPSDWGPLV         |
| OsZOGT3     | 264 | L | -----DRQ   | ---PPD---SVLYVS   | ---FGTTC     | ---SLRV---  | ---EQV-----AELAAATL         |
| OsZOGT1     | 258 | L | -----DKQ   | ---PLA---SVLYVS   | ---FGTTS     | ---SLRG---  | ---DOV-----AELAAAL          |
| ZmcisZOG1   | 262 | L | -----DRQ   | ---PPE---SVLYVS   | ---FGTTS     | ---CLHA---  | ---DOV-----AELAAAL          |
| GmUGT79A6   | 263 | L | -----DGF   | ---PAK---SVILCS   | ---FGSET     | ---FLSD---  | ---YQI-----KELASGL          |
| AtUGT79B6   | 251 | L | -----SKF   | ---DPG---SVIYCA   | ---LGSQI     | ---ILEK---  | ---DOF-----QELCLGM          |
| GmUGT91H9   | 269 | L | -----DKQ   | ---ESS---SVVYIG   | ---FGSEL     | ---RLSQ---  | ---QDV-----TELAHGI          |
| ZmUGT91L1   | 231 | L | -----DEQ   | ---PSK---SVVYVA   | ---FGSEY     | ---PMTV---  | ---KQL-----HEIARGL          |
| PoUGT95A1   | 328 | L | -----ESK   | ---PRE---SVIYIS   | ---FGSEV     | ---GPTI---  | ---EEY-----KELAKAL          |
| MtUGT95B4   | 278 | L | -----DLK   | ---PRS---SVLYVS   | ---FGTEV     | ---SPTM---  | ---EEY-----TELAQAM          |
| PgUGT95B2   | 309 | L | -----DSK   | ---PSG---SVLYVS   | ---FGSEV     | ---GPTM---  | ---EEY-----PQLAQAL          |
| VvUGT95B6   | 303 | L | -----DSK   | ---PRG---SVLYVS   | ---FGSEV     | ---GPTM---  | ---EGY-----AQLALAL          |
| AtUGT82A1   | 277 | L | -----QEQ   | ---NPN---SVIYIS   | ---FGSWV     | ---PIGE---  | ---SNI-----QTLALAL          |
| VpUGT94F1   | 249 | L | -----DEK   | ---SER---STVYIS   | ---FGSEC     | ---FLSK---  | ---EQI-----EIVAKGL          |
| AtUGT87A1   | 248 | L | -----DEQ   | ---PES---SVLYIS   | ---QGSFL     | ---SVSE---  | ---AQM-----EEIVGV           |
| AtUGT72C1   | 257 | L | -----DLQ   | ---PKE---SVVYVL   | ---LGVVG     | ---ALTF---  | ---EQT-----NELAYGL          |
| AtUGT72D1   | 261 | L | -----DEQ   | ---RER---SVVFVC   | ---LGS GG    | ---TLTF---  | ---EQT-----VELALGL          |
| LjUGT72AD1  | 268 | L | -----EKQ   | ---EPN---SVLYIS   | ---FGSAG     | ---TLTH---  | ---DOI-----NELALGL          |
| AtUGT72B1   | 244 | L | -----DNQ   | ---PLG---SVLYVS   | ---FGSGG     | ---TLTC---  | ---EQL-----NELALGL          |
| VvUGT1      | 258 | L | -----DHQ   | ---PSG---SVLFVS   | ---FGSGG     | ---TLSQ---  | ---EQI-----TELALGL          |
| LjUGT72AH1  | 258 | L | -----GQQ   | ---PPK---SVLYVS   | ---FGSGG     | ---TLSQ---  | ---DOI-----NELALGL          |
| LjUGT72Z2   | 278 | L | -----ENQ   | ---IPK---SVLYVS   | ---FGSGG     | ---TLSQ---  | ---EQM-----NELAFGL          |
| GmUGT72X4   | 259 | L | -----DKQ   | ---PPC---SVLYVS   | ---FGSGG     | ---TLSQ---  | ---NQI-----NELASGL          |
| MtUGT72L1   | 267 | L | -----DKQ   | ---QSC---SVLYVS   | ---FGSGG     | ---TLSH---  | ---EQI-----VELALGL          |
| PgUGT72BD1  | 267 | L | -----DDQ   | ---PTE---SVLYVS   | ---FGSGG     | ---TLSA---  | ---DQL-----TELAWGL          |
| AtUGT72E1   | 253 | L | -----NKQ   | ---PDE---SVLYIS   | ---FGSGG     | ---SLSA---  | ---KQL-----TELAWGL          |
| OsUGT706C1  | 264 | L | -----DRQ   | ---PKQ---SVVFCL   | ---FGSRG     | ---TFSV---  | ---SQL-----SEMARGI          |
| OsUGT706D1  | 263 | L | -----DAQ   | ---PAR---SVVFCL   | ---FGSMG     | ---SFSA---  | ---AQL-----KEIARGL          |
| MtUGT88E1   | 265 | L | -----DSQ   | ---PGQ---SVVLLS   | ---FGSLG     | ---RFSK---  | ---AQI-----NQIAIGL          |
| VpUGT88D8   | 254 | L | -----DSQ   | ---PSK---SVIFLC   | ---FGRKG     | ---FFSK---  | ---QQL-----QEIATGL          |
| NmUGT88P1   | 268 | L | -----NSQ   | ---PSK---SVVFCL   | ---FGSLG     | ---TFKE---  | ---DQL-----KEIAIGL          |
| AtUGT88A1   | 264 | L | -----DSQ   | ---PEK---SVVFCL   | ---FGSLG     | ---LFSK---  | ---EQV-----IEIAVGL          |
| VvGT7       | 271 | L | -----ESQ   | ---PKR---SVLFCL   | ---FGSLG     | ---LFSE---  | ---EQL-----KEIAVGL          |
| MdUGT88F1   | 275 | L | -----DKQ   | ---PSR---SVLFCL   | ---FGSMG     | ---SFPA---  | ---AQL-----KEIANGL          |
| ScUGT5      | 266 | L | -----DRQ   | ---PNQ---SVVFCL   | ---FGSRG     | ---SFST---  | ---DQL-----KEIAKGL          |
| OsUGT707A2  | 279 | L | -----DAQ   | ---PRA---SVVFCL   | ---FGSMG     | ---SFAP---  | ---POV-----LEIAAGL          |
| AtUGT71B1   | 258 | L | -----KEQ   | ---PTK---SVVFCL   | ---FGSMG     | ---GFSE---  | ---EQA-----REIAVAL          |
| MdUGT71A15  | 267 | L | -----DDQ   | ---PPF---SVVFCL   | ---FGSMG     | ---SFGE---  | ---AOV-----KEIACAL          |
| BvUGT71F1   | 280 | L | -----DKQ   | ---PSS---SVVFCL   | ---FGSMG     | ---SFDA---  | ---NEV-----KEIANGL          |
| Db6-GT      | 268 | L | -----DEQ   | ---PVN---SVLFVC   | ---FGSMG     | ---TFDE---  | ---DOV-----KEIANGL          |
| AtUGT71C1   | 278 | L | -----DDQ   | ---PES---SVVFCL   | ---FGSLK     | ---NLSA---  | ---TOI-----NEIAQAL          |
| AtUGT71C4   | 276 | L | -----DDQ   | ---PES---SVVFCL   | ---FGSRG     | ---SVDE---  | ---POV-----KEIARAL          |
| AtUGT71D1   | 269 | L | -----DDQ   | ---PEA---SVVFCL   | ---FGSMA     | ---RLRG---  | ---SLV-----KEIAHGL          |
| FaUGT71W2   | 264 | L | -----DNQ   | ---PPK---SVVFCL   | ---FGSFG     | ---SFDE---  | ---AQL-----REIAIGL          |
| MtUGT71G1   | 270 | L | -----DEQ   | ---PDK---SVVFCL   | ---FGSMGV    | ---SFGP---  | ---SQI-----REIALGL          |
| MdUGT71K1   | 270 | L | -----DDQ   | ---PQK---SVVFCL   | ---FGSMG     | ---SFGA---  | ---EQV-----KEIAVGL          |
| AtUGT89A2   | 276 | L | -----DGS   | ---PNG---SVLYVC   | ---FGSQK     | ---ALTK---  | ---DQC-----DALALGL          |
| AtUGT89C1   | 234 | L | -----DSC   | ---PED---NSVYVVG  | ---FGSQI     | ---RLTA---  | ---EQT-----AALAAAL          |
| AtUGT89B1   | 274 | L | -----DAR   | ---EDN---HVVYVC   | ---FGSQV     | ---VLTK---  | ---EQT-----LALASGL          |
| NmUGT89P1   | 267 | L | -----DTK   | ---TNSDN---SVYVVC | ---FGSRV     | ---ELTT---  | ---EQL-----DSLAAAL          |
| AtUGT92A1   | 277 | L | -----DSK   | ---PDH---SVYVVC   | ---FGSMN     | ---SILQ---  | ---THM-----LELAMAL          |
| GbUGT92K1   | 287 | L | -----DSH   | ---PAS---SVLYIS   | ---FGSQN     | ---SISV---  | ---SOM-----RELSLGL          |
| GmUGT92G4   | 280 | L | -----DSK   | ---DEN---SVLYIS   | ---FGSLH     | ---TINA---  | ---SOM-----MALAEGGL         |
| PoUGT90A7   | 269 | L | -----DQK   | ---LAQGC---SVLYVA | ---FGSQA     | ---EIST---  | ---KQL-----EAIKGL           |
| AtUGT90A1   | 272 | L | -----DQK   | ---REEGRPVLYVA    | ---FGTQA     | ---EISN---  | ---KQL-----MELAFGL          |
| AcUGT73J1   | 260 | L | -----DGK   | ---EEG---SVLYVC   | ---FGSLC     | ---HFSG---  | ---GQL-----RELALGL          |
| MtUGT73P1   | 281 | L | -----DSK   | ---KYD---SVLYVS   | ---FGSMN     | ---KFPT---  | ---POL-----VEIAHAL          |
| SrUGT73E1   | 284 | L | -----DER   | ---KLG---SVLYVC   | ---LGS LA    | ---RISA---  | ---AQA-----IELGLGL          |
| CpPGT4      | 274 | L | -----DSQ   | ---QPS---SVYVVC   | ---LGS IC    | ---NLPS---  | ---SQL-----IELGLGL          |
| AtUGT73C1   | 277 | L | -----DSK   | ---EEG---SVLYVC   | ---LGS IC    | ---NLPL---  | ---SQL-----KELGLGL          |
| CpPGT2      | 274 | L | -----DSK   | ---APK---SVYVAC   | ---LGS IC    | ---NLIP---  | ---SOM-----RELGLGL          |
| PjGAT       | 282 | L | -----DSM   | ---KPK---SVIYAC   | ---LGSQC     | ---RLVP---  | ---AQL-----MELGLAL          |
| CtiUGT73AE1 | 278 | L | -----DSR   | ---EPG---SVIYAC   | ---FGSSS     | ---RVIP---  | ---QQL-----IELGLGL          |
| CaUGT73AH1  | 281 | L | -----DAE   | ---KNG---SVIYVC   | ---LGS LS    | ---SLSNLSGA | ---QI-----IELALGL           |
| PzGAT2      | 279 | L | -----DNW   | ---ANG---SVIYAC   | ---LGS IS    | ---SLTC---  | ---TQL-----MELALGL          |
| AcUGT73G1   | 272 | L | -----GKK   | ---SAG---SVLYVC   | ---FGSAS     | ---FFT---   | ---ROL-----REIAVGL          |
| MtUGT73K1   | 267 | L | -----DTK   | ---EPS---SVLYIS   | ---FGSLC     | ---RLSN---  | ---EQL-----KEMANGI          |
| GeUGT73F1   | 265 | L | -----DSK   | ---RDD---SVLYIC   | ---FGSLC     | ---HFSD---  | ---KQL-----YEIACGV          |
| AtUGT73B1   | 282 | L | -----DSK   | ---KCD---SVIYMA   | ---FGTMS     | ---SFKN---  | ---EQL-----IEIAAGL          |
| GuUGAT      | 272 | L | -----QSK   | ---EPN---SVYVVC   | ---FGSMM     | ---VFSD---  | ---AQL-----KEIAMGL          |
| NmUGT73BD1  | 265 | L | -----DSK   | ---KPY---SVIYAC   | ---FGSVG     | ---RLSK---  | ---LQL-----HEIALGL          |
| NmUGT73BD1  | 1   |   | -----      | -----             | -----        | -----       | -----MTAQFHVVFPP-LM-AQGHILP |

|             |     |   |       |       |         |          |           |            |       |       |       |      |         |            |
|-------------|-----|---|-------|-------|---------|----------|-----------|------------|-------|-------|-------|------|---------|------------|
| NtTOGT1     | 272 | L | ----- | DSK   | --KPS   | --SVVYIC | --FGSVA   | --NFTA     | ---   | SQL   | ----- | HEL  | AMGV    | --         |
| BvUGT73A4   | 278 | L | ----- | NSK   | --KPN   | --SVIYIC | --FGSTM   | --HMIP     | ---   | SOL   | ----- | NEI  | AMGL    | --         |
| Db5-GT      | 279 | L | ----- | NSK   | --KPD   | --SVIYIC | --FGSTG   | --HLIA     | ---   | POL   | ----- | HEI  | ATAL    | --         |
| AtUGT86A1   | 279 | L | ----- | KGR   | --PTG   | --SVLYVS | --FGSYA   | --HVGK     | ---   | KEI   | ----- | VEI  | AHGL    | --         |
| ZmUGFT1     | 282 | L | ----- | GRQ   | --PAR   | --GVAYVS | --FGTVA   | --CPRP     | ---   | DEL   | ----- | REL  | AAGL    | --         |
| CteUGT78K6  | 258 | L | ----- | DSK   | --SSR   | --SVAYVC | --FGTVV   | --SPPP     | ---   | QEV   | ----- | VAV  | AEAL    | --         |
| AtUGT78D1   | 265 | M | ----- | GKR   | --SAA   | --SVAYIS | --FGTVM   | --EPPP     | ---   | EEL   | ----- | VAI  | AQGL    | --         |
| CoUGT78B3   | 265 | L | ----- | DAQ   | P-KPS   | --SVAYIS | --FGTMA   | --TPPP     | ---   | QEL   | ----- | KAL  | AEGI    | --         |
| MtUGT78G1   | 267 | L | ----- | DQH   | --ENS   | --SVVYIS | --FGSVV   | --TPPP     | ---   | HEL   | ----- | TAL  | AESL    | --         |
| LgUGT78J1   | 256 | L | ----- | GKQT  | --RPK   | --SVVYIS | --FSTVA   | --TPPE     | ---   | KEL   | ----- | VAL  | AEAL    | --         |
| CpPGT11     | 263 | L | ----- | DQQ   | --QAN   | --SVIYVA | --LGSHT   | --VLEQ     | ---   | NOF   | ----- | QEL  | ALGL    | --         |
| AtUGT83A1   | 280 | L | ----- | DRQ   | --IPG   | --SVIYVA | --FGSFG   | --VMGN     | ---   | POL   | ----- | EEL  | AIGL    | --         |
| FaUGT75T1   | 260 | L | ----- | DTK   | --ADS   | --SVVYVS | --FGSMV   | --VLRS     | ---   | GOM   | ----- | EEM  | LHGL    | --         |
| AtUGT75C1   | 262 | L | ----- | DSK   | --LER   | --SVIYIS | --LGTHADD | --LPE      | ---   | KHM   | ----- | EAL  | THGV    | --         |
| AtUGT75B1   | 252 | L | ----- | DSK   | --TES   | --SVIYVS | --FGTMV   | --ELSK     | ---   | KOI   | ----- | EEL  | ARAL    | --         |
| AtUGT75D1   | 272 | L | ----- | DTK   | --ADS   | --SVLYVS | --FGTLA   | --VLSK     | ---   | KOL   | ----- | VEL  | CKAL    | --         |
| ZmUGT74A1   | 272 | L | ----- | DTK   | --PDR   | --SVAYVS | --FGSLA   | --SLGN     | ---   | AOK   | ----- | EEL  | ARGL    | --         |
| AsUGT74H5   | 258 | L | ----- | DAQ   | --PPR   | --SVTYVS | --FGSMA   | --TPGP     | ---   | TEM   | ----- | AEM  | AEGL    | --         |
| BdUGT74J7   | 277 | L | ----- | DSH   | --PPC   | --SVVYAS | --YGTVA   | --DLDO     | ---   | AOL   | ----- | EEL  | GNGL    | --         |
| SrUGT74G1   | 268 | L | ----- | DDK   | --PKE   | --SVVYVA | --FGSLV   | --KHGP     | ---   | EOV   | ----- | EEL  | TRAL    | --         |
| AtUGT74B1   | 269 | L | ----- | ETK   | --QAQ   | --SVAFVS | --FGSFG   | --ILFE     | ---   | KOL   | ----- | AEL  | AIAL    | --         |
| RsUGT74R1   | 259 | L | ----- | CER   | --RAS   | --SVIYVS | --FGSMA   | --ILKQ     | ---   | EOI   | ----- | EEL  | AKCL    | --         |
| LuUGT74S1   | 268 | L | ----- | QSK   | --PDG   | --SVVYVS | --FGSLA   | --RLSP     | ---   | QOT   | ----- | EEL  | YFGL    | --         |
| AtUGT74F1   | 258 | L | ----- | DKR   | --PEG   | --SVVYIA | --FGSMA   | --KLSS     | ---   | EOM   | ----- | EEL  | ASAI    | --         |
| SgUGT74AC1  | 263 | L | ----- | DSK   | --PSG   | --SVLYVS | --YGLSV   | --EMGE     | ---   | EOL   | ----- | KEL  | ALGI    | --         |
| AtUGT74C1   | 266 | L | ----- | GNR   | --PAK   | --SVVYVA | --FGTLV   | --ALSE     | ---   | KOM   | ----- | KEI  | AMAI    | --         |
| AtUGT74D1   | 264 | L | ----- | DSK   | --PPG   | --SVIYVS | --FGSLA   | --VLKD     | ---   | DOM   | ----- | IEV  | AAGL    | --         |
| AtUGT74E2   | 264 | L | ----- | NSK   | --EPN   | --SVVYLS | --FGSLV   | --ILKE     | ---   | DOM   | ----- | LEL  | AAGL    | --         |
| AtUGT84B1   | 263 | L | ----- | DKQ   | --ARS   | --SVVYIS | --FGSML   | --ETLE     | ---   | NOV   | ----- | EEL  | AKAL    | --         |
| DgphBAGT    | 273 | L | ----- | DSK   | --PVG   | --SVVYVS | --FGSVA   | --VLEQ     | ---   | QSM   | ----- | EEL  | TRGL    | --         |
| MtUGT84F1   | 267 | L | ----- | NTK   | --PKG   | --SVVYIS | --FGTVV   | --YLPQ     | ---   | ELV   | ----- | YEL  | AYGL    | --         |
| GtUF6CGT1   | 274 | L | ----- | DSR   | --PTS   | --TVVYVS | --VGSVV   | --YLKQ     | ---   | EOV   | ----- | TEM  | AYGI    | --         |
| PgUGT84A23  | 269 | L | ----- | DSK   | --PAS   | --SVVYVS | --FGSVV   | --YLKQ     | ---   | DOW   | ----- | DEL  | AYGL    | --         |
| PgUGT84A24  | 268 | L | ----- | DSK   | --PPA   | --SVVYVS | --FGSVV   | --YLKQ     | ---   | DOW   | ----- | DEL  | AFGL    | --         |
| AtUGT76E1   | 257 | L | ----- | NKQ   | --KIG   | --SVIYIS | --LGSIA   | --LMET     | ---   | KDM   | ----- | LEM  | AWGL    | --         |
| AtUGT76D1   | 254 | L | ----- | EKQ   | --ETS   | --SVIYIS | --MGSIA   | --MTQD     | ---   | IEA   | ----- | VEM  | AMGF    | --         |
| SrUGT76G1   | 268 | L | ----- | DQQ   | --PPS   | --SVLYVS | --FGSTS   | --EVDE     | ---   | KDF   | ----- | LEI  | ARGL    | --         |
| VvGT15      | 288 | L | ----- | DKH   | --SPK   | --SVIYVS | --WGLA    | --CMDA     | ---   | KDL   | ----- | AEL  | AWGL    | --         |
| AtUGT76C1   | 264 | L | ----- | DMR   | --ETR   | --SVVYVS | --LGSIA   | --SLNE     | ---   | SDF   | ----- | LEI  | ACGL    | --         |
| AtUGT76B1   | 254 | L | ----- | DKQ   | --ATN   | --SVIYAS | --LGSIA   | --SIDE     | ---   | SEF   | ----- | LEI  | AWGL    | --         |
| CsUGT76F1   | 256 | L | ----- | DKQ   | --APK   | --SVIYVS | --FGSIA   | --AVSE     | ---   | AEF   | ----- | LEI  | AWGL    | --         |
| OsUGT709A4  | 281 | L | ----- | DGQ   | --ADR   | --SVVYVS | --LGSIT   | --VISP     | ---   | EOF   | ----- | TEF  | LSGL    | --         |
| SrUGT85C2   | 288 | L | ----- | QSK   | --EPN   | --SVVYVN | --FGSTT   | --VMSL     | ---   | EDM   | ----- | TEF  | GWGL    | --         |
| CoUGT85N1   | 286 | L | ----- | QEK   | --DPK   | --SVLYVN | --IGSLA   | --TMTS     | ---   | QOL   | ----- | GEF  | AWGL    | --         |
| MeUGT85K4   | 288 | L | ----- | DKR   | --EPD   | --SVVYVN | --YGCVT   | --TITN     | ---   | EOL   | ----- | NEF  | AWGL    | --         |
| AtUGT85A1   | 292 | L | ----- | DTK   | --TQN   | --SVIYIN | --FGSIT   | --VLSV     | ---   | KOL   | ----- | VEF  | AWGL    | --         |
| MtUGT85H2   | 289 | L | ----- | ESK   | --EPG   | --SVVYVN | --FGSIT   | --VMTP     | ---   | EOL   | ----- | LEF  | AWGL    | --         |
| MdUGT71K1   | 270 | L | ----- | DDQ   | --PQK   | --SVVFLC | --FGSMG   | --SFGA     | ---   | EOV   | ----- | KEI  | AVGL    | --         |
| AtUGT89A2   | 276 | L | ----- | DGS   | --PNG   | --SVLYVC | --FGSQK   | --ALTK     | ---   | DOC   | ----- | DAL  | ALGL    | --         |
| AtUGT89C1   | 234 | L | ----- | DSC   | --PED   | N-SVVYVG | --FGSQI   | --RLTA     | ---   | EOT   | ----- | AAL  | AAAL    | --         |
| AtUGT89B1   | 274 | L | ----- | DAR   | --EDN   | --HVYVC  | --FGSQV   | --VLTG     | ---   | EOT   | ----- | LAL  | ASGL    | --         |
| NmUGT89P1   | 267 | L | ----- | DTK   | TNSDN   | --SVVYVC | --FGSRV   | --ELTT     | ---   | EOL   | ----- | DSL  | AAAL    | --         |
| AtUGT92A1   | 277 | L | ----- | DSK   | --PDH   | --SVVYVC | --FGSMN   | --SILQ     | ---   | THM   | ----- | LEL  | AMAL    | --         |
| GbUGT92K1   | 287 | L | ----- | DSH   | --PAS   | --SVLYIS | --FGSQN   | --SISV     | ---   | SOM   | ----- | REL  | SLGL    | --         |
| GmUGT92G4   | 280 | L | ----- | DSK   | --DEN   | --SVLYIS | --FGSLH   | --TINA     | ---   | SOM   | ----- | MAL  | AEGL    | --         |
| PoUGT90A7   | 269 | L | ----- | DQK   | LAQGC   | --SVLYVA | --FGSQA   | --EIST     | ---   | KOL   | ----- | EAL  | SKGL    | --         |
| AtUGT90A1   | 272 | L | ----- | DQK   | --REEGR | PVLYVA   | --FGTQA   | --EISN     | ---   | KOL   | ----- | MEL  | AFGL    | --         |
| AcUGT73J1   | 260 | L | ----- | DGK   | --EEG   | --SVLYVC | --FGSLC   | --HFSG     | ---   | GOL   | ----- | REL  | ALGL    | --         |
| MtUGT73P1   | 281 | L | ----- | DSK   | --KYD   | --SVLYVS | --FGSMN   | --KFPT     | ---   | POL   | ----- | VEI  | AHAL    | --         |
| SrUGT73E1   | 284 | L | ----- | DER   | --KLG   | --SVLYVC | --LGSIA   | --RISA     | ---   | AQA   | ----- | IEL  | GLGL    | --         |
| CpPGT4      | 274 | L | ----- | DSQ   | --QPS   | --SVVYVC | --LGSIC   | --NLPS     | ---   | SOL   | ----- | IEL  | GLGL    | --         |
| AtUGT73C1   | 277 | L | ----- | DSK   | --EEG   | --SVLYVC | --LGSIC   | --NLPL     | ---   | SOL   | ----- | KEL  | GLGL    | --         |
| CpPGT2      | 274 | L | ----- | DSK   | --APK   | --SVVYAC | --LGSIC   | --NLIP     | ---   | SOM   | ----- | REL  | GLGL    | --         |
| PjGAT       | 282 | L | ----- | DSM   | --KPK   | --SVIYAC | --LGSQC   | --RLVP     | ---   | AOL   | ----- | MEL  | GLAL    | --         |
| CtiUGT73AE1 | 278 | L | ----- | DSR   | --EPG   | --SVIYAC | --FGSSS   | --RVIP     | ---   | QOL   | ----- | IEL  | GLGL    | --         |
| CaUGT73AH1  | 281 | L | ----- | DAE   | --KNG   | --SVIYVC | --LGSLS   | --SLSNLSGA | QI    | ---   | ---   | IEL  | ALGL    | --         |
| PzGAT2      | 279 | L | ----- | DNW   | --ANG   | --SVIYAC | --LGSIS   | --SLTC     | ---   | TOL   | ----- | MEL  | ALGL    | --         |
| AcUGT73G1   | 272 | L | ----- | GKK   | --SAG   | --SVLYVC | --FGSAS   | --FFT      | ---   | ROL   | ----- | REL  | AVGL    | --         |
| MtUGT73K1   | 267 | L | ----- | DTK   | --EPS   | --SVLYIS | --FGSLC   | --RLSN     | ---   | EOL   | ----- | KEM  | ANGI    | --         |
| GeUGT73F1   | 265 | L | ----- | DSK   | --RDD   | --SVLYIC | --FGSLC   | --HFSD     | ---   | KOL   | ----- | YEL  | ACGV    | --         |
| AtUGT73B1   | 282 | L | ----- | DSK   | --KCD   | --SVIYMA | --FGTMS   | --SFKN     | ---   | EOL   | ----- | IEL  | AAGL    | --         |
| GuUGAT      | 272 | L | ----- | QSK   | --EPN   | --SVVYVC | --FGSMM   | --VFSD     | ---   | AOL   | ----- | KEI  | AMGL    | --         |
| NmUGT73BD1  | 265 | L | ----- | DSK   | --KPY   | --SVIYAC | --FGSVG   | --RLSK     | ---   | LQL   | ----- | HEI  | ALGL    | --         |
| NmUGT73BD1  | 1   | L | ----- | ----- | -----   | -----    | -----     | -----      | ----- | ----- | ----- | MTAQ | FHVVFPP | LM-AQGHILP |

|             |     |                |       |                                  |                      |                   |                     |                        |           |         |             |         |           |         |             |              |          |         |                       |
|-------------|-----|----------------|-------|----------------------------------|----------------------|-------------------|---------------------|------------------------|-----------|---------|-------------|---------|-----------|---------|-------------|--------------|----------|---------|-----------------------|
| AtUGT81A1   | 376 | KNLGEAVGQVLIIC | G     | ---                              | RNKKL                | -----             | QSKLSSLDWKI         | -----                  | -----     |         |             |         |           |         |             |              |          |         |                       |
| AtUGT80A2   | 418 | ---DVGFCYLDL   | ---   | ASNYEPPAELVEWLEAGDKPIYIGFGSLPVQE | PEKMT                | EIIVEALQ          | ---                 | ---                    |           |         |             |         |           |         |             |              |          |         |                       |
| AtUGT80B1   | 381 | ---DVGYCFNL    | ---   | GSKYQPREEFLHWIERGSPVYIGFGSMLPDDP | PKQTM                | DIILETLK          | ---                 | ---                    |           |         |             |         |           |         |             |              |          |         |                       |
| OsZOGT3     | 296 | ---RGSKQRFIIV  | ---   | M---                             | RDADR                | -----             | GNIFTDTGEGE         | TRHAKL                 | ---       | SEFSKQT |             |         |           |         |             |              |          |         |                       |
| OsZOGT1     | 290 | ---KGSKQRFIIV  | ---   | L---                             | RDADR                | -----             | ANIFADSGESRHAEL     | ---                    | ---       | SRFTAET |             |         |           |         |             |              |          |         |                       |
| ZmcisZOG1   | 294 | ---KGSKQRFVWV  | ---   | L---                             | RDADR                | -----             | ADIYAESGESRHAMFL    | ---                    | ---       | SEFTRET |             |         |           |         |             |              |          |         |                       |
| GmUGT79A6   | 295 | ---ELTGLPFIIV  | ---   | L---                             | NFPSN                | -----             | LSAKAELERALP        | ---                    | ---       | KGYLERV |             |         |           |         |             |              |          |         |                       |
| AtUGT79B6   | 283 | ---ELTGLPFLVA  | ---   | V---                             | KPPKG                | -----             | SSTIQEALP           | ---                    | ---       | KGFEERV |             |         |           |         |             |              |          |         |                       |
| GmUGT91H9   | 301 | ---ELSGLRFFWA  | ---   | L---                             | RNLQK                | -----             | ---                 | ---                    | ---       | EDLP    | ---         | HGFEERT |           |         |             |              |          |         |                       |
| ZmUGT91L1   | 263 | ---ELAGTRFLWA  | ---   | L---                             | KRPSV                | -----             | ---                 | ---                    | ---       | AHPDEDL | ---         | PGFEERT |           |         |             |              |          |         |                       |
| PoUGT95A1   | 360 | ---EESDQPFIVV  | ---   | I                                | QPGSGKSGIPRSFLGPAAAH | TDDSEEE           | EGYYP               | ---                    | ---       | ---     | DGLDVTV     |         |           |         |             |              |          |         |                       |
| MtUGT95B4   | 310 | ---ESCEQPFIVV  | ---   | V                                | QTGKGRPS             | ---               | PPRLRGEPLGIPKAEGYFP | ---                    | ---       | ---     | HGLDKRV     |         |           |         |             |              |          |         |                       |
| PgUGT95B2   | 341 | ---EESSSPFIVV  | ---   | I                                | ---                  | QPGSGRGGP         | RFTFLGKPDSDPKEGYFP  | ---                    | ---       | ---     | HGLKEKV     |         |           |         |             |              |          |         |                       |
| VvUGT95B6   | 335 | ---EASNRPFIVV  | ---   | L                                | ---                  | QPGSG             | ---                 | RPGPPRRPGSDSNEDSGYYP   | ---       | ---     | DGLEEKV     |         |           |         |             |              |          |         |                       |
| AtUGT82A1   | 310 | ---EASGRPFILWA | ---   | L                                | ---                  | ---               | ---                 | ---                    | ---       | ---     | NRVWQEGLP   | ---     | PGFVHRVT  |         |             |              |          |         |                       |
| VpUGT94F1   | 281 | ---ELSNVNFIVV  | ---   | I                                | ---                  | RFPEG             | -----               | ---                    | ---       | ---     | KNSMTVENALP | ---     | EGFLERV   |         |             |              |          |         |                       |
| AtUGT87A1   | 280 | ---REAGVKFFVW  | ---   | A                                | ---                  | RGGEL             | -----               | ---                    | ---       | ---     | KLK         | ---     | EALEGSL   |         |             |              |          |         |                       |
| AtUGT72C1   | 289 | ---ELTGHRFVWV  | ---   | V                                | ---                  | RPPAE             | ---                 | DDPSASMFDKTKNETEPLDFLP | ---       | ---     | ---         | ---     | NGFLDRT   |         |             |              |          |         |                       |
| AtUGT72D1   | 293 | ---ELSGQRFVWV  | ---   | L                                | ---                  | RRPAS             | -----               | YLGAISSDDEQVSASLP      | ---       | ---     | ---         | ---     | EGFLDRT   |         |             |              |          |         |                       |
| LjUGT72AD1  | 300 | ---ELSGEKFLWV  | ---   | I                                | ---                  | RPPHK             | ---                 | LEFIGDFGVGDEDP         | LKCLP     | ---     | ---         | ---     | DGFLERT   |         |             |              |          |         |                       |
| AtUGT72B1   | 276 | ---ADSEQRFLWV  | ---   | I                                | ---                  | RSPSG             | ---                 | IANSSYFDSHSQTDPLTFLP   | ---       | ---     | ---         | ---     | PGFLERT   |         |             |              |          |         |                       |
| VvUGT1      | 290 | ---EMSGQRFLWV  | ---   | V                                | ---                  | KSPHE             | ---                 | TAANASFFSAQTIKDPDFLP   | ---       | ---     | ---         | ---     | KGFLDRT   |         |             |              |          |         |                       |
| LjUGT72AH1  | 290 | ---ELSRKKFLWV  | ---   | NV                               | ---                  | RAPND             | ---                 | SAT-ASYLSDDNELSDPLQFLP | ---       | ---     | ---         | ---     | PGFLERT   |         |             |              |          |         |                       |
| LjUGT72Z2   | 310 | ---ELSGQKFLWV  | ---   | V                                | ---                  | RAPSD             | ---                 | SANAAYLGVGNEDPLKFLP    | ---       | ---     | ---         | ---     | SGFIERT   |         |             |              |          |         |                       |
| GmUGT72X4   | 291 | ---ELSGQRFLWV  | ---   | L                                | ---                  | RAPNN             | ---                 | SASAAYLEASKEDPLQFLP    | ---       | ---     | ---         | ---     | SGFLERT   |         |             |              |          |         |                       |
| MtUGT72L1   | 299 | ---ELSNQKFLWV  | ---   | V                                | ---                  | RAPSS             | ---                 | SSNAAYLSAQNDVDALQFLP   | ---       | ---     | ---         | ---     | SGFLERT   |         |             |              |          |         |                       |
| PgUGT72BD1  | 299 | ---EQSQHRFIVV  | ---   | V                                | ---                  | RPPQE             | ---                 | NSACGAYFEQAKRADGTPEYLP | ---       | ---     | ---         | ---     | DGFVTRT   |         |             |              |          |         |                       |
| AtUGT72E1   | 285 | ---EMSQRQFVWV  | ---   | V                                | ---                  | RPPVDGSACSAYLSANS | GKIRDGTPDYLP        | ---                    | ---       | ---     | ---         | ---     | EGFVSTR   |         |             |              |          |         |                       |
| OsUGT706C1  | 296 | ---ENSGHRFLWA  | ---   | V                                | ---                  | RSNLG             | -----               | ---                    | ---       | ---     | ---         | ---     | EVDLEALFP | ---     | EGFLERT     |              |          |         |                       |
| OsUGT706D1  | 295 | ---ESGHRFLWV   | ---   | V                                | ---                  | RSPRQ             | ---                 | DPANLLEHLPEPDLAALP     | ---       | ---     | ---         | ---     | ---       | EGFLERT |             |              |          |         |                       |
| MtUGT88E1   | 297 | ---EKSEQRFLWI  | ---   | V                                | ---                  | RSDME             | -----               | ---                    | ---       | ---     | ---         | ---     | SEELSLDEL | ---     | EGFLERT     |              |          |         |                       |
| VpUGT88D8   | 286 | ---ENSGHRFLWS  | ---   | V                                | ---                  | RNPPG             | -----               | ---                    | ---       | ---     | ---         | ---     | INNEPDL   | LETL    | ---         | EGFLERT      |          |         |                       |
| NmUGT88P1   | 300 | ---ENSGHRFLWV  | ---   | M                                | ---                  | KSPPI             | ---                 | DDKTKRFLPPPEP          | DFNLLP    | ---     | ---         | ---     | ---       | EGFLERT |             |              |          |         |                       |
| AtUGT88A1   | 296 | ---EKSGQRFLWV  | ---   | V                                | ---                  | RNPPE             | -----               | ---                    | ---       | ---     | ---         | ---     | ---       | ---     | LEKTELDKSLP | ---          | EGFLSRT  |         |                       |
| VvGT7       | 303 | ---ERSGQRFLWV  | ---   | V                                | ---                  | RSPPS             | ---                 | KDPSRRFLAPPEP          | DLNSLLP   | ---     | ---         | ---     | ---       | ---     | ---         | DGFLDRT      |          |         |                       |
| MdUGT88F1   | 307 | ---EASGQRFLWV  | ---   | V                                | ---                  | KKPPV             | ---                 | EEKSKQVHGVD            | DFDLKGVLP | ---     | ---         | ---     | ---       | ---     | ---         | EGFLERT      |          |         |                       |
| ScUGT5      | 298 | ---ERSGQRFLWA  | ---   | V                                | ---                  | KKPPF             | ---                 | DKNSKEVEELGEF          | NVMEIMP   | ---     | ---         | ---     | ---       | ---     | ---         | EGFLDRT      |          |         |                       |
| OsUGT707A2  | 311 | ---ERSGHRFLWV  | ---   | L                                | ---                  | RGRPPAG           | ---                 | ---                    | ---       | ---     | ---         | ---     | ---       | ---     | ---         | SPYPTDADADEL | ---      | EGFLERT |                       |
| AtUGT71B1   | 290 | ---ERSGHRFLWS  | ---   | L                                | ---                  | RRASP             | ---                 | VGNKSNPPPGEFT          | NLEELP    | ---     | ---         | ---     | ---       | ---     | ---         | ---          | KGFLDRT  |         |                       |
| MdUGT71A15  | 299 | ---EHSGHRFLWS  | ---   | L                                | ---                  | RRPPP             | ---                 | ---                    | ---       | ---     | ---         | ---     | ---       | ---     | ---         | QGKRAMP      | SDYEDLKT | ---     | EGFLDRT               |
| BvUGT71F1   | 312 | ---EKSGHRFLWS  | ---   | L                                | ---                  | RKPPS             | ---                 | AGTTQPSQDQ             | TVEALP    | ---     | ---         | ---     | ---       | ---     | ---         | ---          | ---      | EGFVDR  |                       |
| Db6-GT      | 300 | ---EQSGYCFLWS  | ---   | L                                | ---                  | RQPPP             | ---                 | ---                    | ---       | ---     | ---         | ---     | ---       | ---     | ---         | ---          | ---      | ---     | EGFVERT               |
| AtUGT71C1   | 310 | ---EIVDCKFIWS  | ---   | F                                | ---                  | RTNPK             | -----               | ---                    | ---       | ---     | ---         | ---     | ---       | ---     | ---         | ---          | ---      | ---     | HGFMDRV               |
| AtUGT71C4   | 308 | ---ELVGC       | RFLWS | ---                              | I                    | ---               | RTSGD               | -----                  | ---       | ---     | ---         | ---     | ---       | ---     | ---         | ---          | ---      | ---     | EGFMGRV               |
| AtUGT71D1   | 301 | ---ELCQYRFLWS  | ---   | L                                | ---                  | RKEEV             | -----               | ---                    | ---       | ---     | ---         | ---     | ---       | ---     | ---         | ---          | ---      | ---     | EGFLDRV               |
| FaUGT71W2   | 296 | ---EKSGHRFLWS  | ---   | V                                | ---                  | RQRPPKG           | -----               | ---                    | ---       | ---     | ---         | ---     | ---       | ---     | ---         | ---          | ---      | ---     | QGFLERT               |
| MtUGT71G1   | 303 | ---KHSGVRFLWS  | ---   | ---                              | ---                  | NSAEK             | -----               | ---                    | ---       | ---     | ---         | ---     | ---       | ---     | ---         | ---          | ---      | ---     | EGFLEWM               |
| MdUGT71K1   | 302 | ---EQSGQRFLWS  | ---   | L                                | ---                  | RMPSP             | -----               | ---                    | ---       | ---     | ---         | ---     | ---       | ---     | ---         | ---          | ---      | ---     | DGFLERT               |
| AtUGT89A2   | 308 | ---EKSMTRFVWV  | ---   | V                                | ---                  | KKDPI             | -----               | ---                    | ---       | ---     | ---         | ---     | ---       | ---     | ---         | ---          | ---      | ---     | DGFEDRV               |
| AtUGT89C1   | 267 | ---EKSSVRFIWA  | ---   | V                                | ---                  | RDAAK             | -----               | ---                    | ---       | ---     | ---         | ---     | ---       | ---     | ---         | ---          | ---      | ---     | AGFEERV               |
| AtUGT89B1   | 306 | ---EKSGVHFIWA  | ---   | V                                | ---                  | KEPVE             | -----               | ---                    | ---       | ---     | ---         | ---     | ---       | ---     | ---         | ---          | ---      | ---     | DGFDRV                |
| NmUGT89P1   | 301 | ---EISGVHFILC  | ---   | V                                | ---                  | KLHQE             | -----               | ---                    | ---       | ---     | ---         | ---     | ---       | ---     | ---         | ---          | ---      | ---     | KEYEDRV               |
| AtUGT92A1   | 309 | ---ESSEKNFIWV  | ---   | V                                | ---                  | RPPIG             | -----               | ---                    | ---       | ---     | ---         | ---     | ---       | ---     | ---         | ---          | ---      | ---     | EGFEERI               |
| GbUGT92K1   | 319 | ---EASQQA      | FVWA  | ---                              | L                    | ---               | RPPVG               | -----                  | ---       | ---     | ---         | ---     | ---       | ---     | ---         | ---          | ---      | ---     | HGFEERM               |
| GmUGT92G4   | 312 | ---EESGKSFIWV  | ---   | I                                | ---                  | RPPVG             | -----               | ---                    | ---       | ---     | ---         | ---     | ---       | ---     | ---         | ---          | ---      | ---     | KGFEESM               |
| PoUGT90A7   | 303 | ---EESGVN      | FLWA  | ---                              | V                    | ---               | RKYETS              | AV                     | ---       | ---     | ---         | ---     | ---       | ---     | ---         | ---          | ---      | ---     | DELQERV               |
| AtUGT90A1   | 306 | ---EDSKVN      | FLWV  | ---                              | T                    | ---               | RKDVE               | -----                  | ---       | ---     | ---         | ---     | ---       | ---     | ---         | ---          | ---      | ---     | EGFNDRV               |
| AcUGT73J1   | 292 | ---EKCNKN      | FLWV  | ---                              | V                    | ---               | RKEAE               | -----                  | ---       | ---     | ---         | ---     | ---       | ---     | ---         | ---          | ---      | ---     | ENYKERV               |
| MtUGT73P1   | 313 | ---EDSGHDFI    | WV    | ---                              | V                    | ---               | RKIED               | -----                  | ---       | ---     | ---         | ---     | ---       | ---     | ---         | ---          | ---      | ---     | SEFEKRM               |
| SrUGT73E1   | 316 | ---ESINRPF     | IWC   | ---                              | V                    | ---               | RNETD               | -----                  | ---       | ---     | ---         | ---     | ---       | ---     | ---         | ---          | ---      | ---     | DGFEEV                |
| CpPGT4      | 306 | ---EASNKPF     | VWV   | ---                              | I                    | ---               | RGVSK               | -----                  | ---       | ---     | ---         | ---     | ---       | ---     | ---         | ---          | ---      | ---     | QENFEERI              |
| AtUGT73C1   | 309 | ---EESQRPF     | IWV   | ---                              | I                    | ---               | RGWEK               | -----                  | ---       | ---     | ---         | ---     | ---       | ---     | ---         | ---          | ---      | ---     | ESGYKERI              |
| CpPGT2      | 306 | ---EASNRPF     | IWV   | ---                              | I                    | ---               | REGET               | -----                  | ---       | ---     | ---         | ---     | ---       | ---     | ---         | ---          | ---      | ---     | EDGFEERI              |
| PjGAT       | 314 | ---ESSKHP      | IWV   | ---                              | I                    | ---               | KEGER               | -----                  | ---       | ---     | ---         | ---     | ---       | ---     | ---         | ---          | ---      | ---     | EEFEERI               |
| CtiUGT73AE1 | 310 | ---ESSNRPF     | IWV   | ---                              | I                    | ---               | RAGDR               | -----                  | ---       | ---     | ---         | ---     | ---       | ---     | ---         | ---          | ---      | ---     | ETGFEERT              |
| CaUGT73AH1  | 316 | ---EMSGYPF     | IWA   | ---                              | L                    | ---               | RPGIK               | -----                  | ---       | ---     | ---         | ---     | ---       | ---     | ---         | ---          | ---      | ---     | EEGFEERV              |
| PzGAT2      | 311 | ---EASERP      | FVWV  | ---                              | V                    | ---               | RAGGK               | -----                  | ---       | ---     | ---         | ---     | ---       | ---     | ---         | ---          | ---      | ---     | EEGFEEST              |
| AcUGT73G1   | 304 | ---EGSGHAF     | IWV   | ---                              | V                    | ---               | RDDGD               | -----                  | ---       | ---     | ---         | ---     | ---       | ---     | ---         | ---          | ---      | ---     | EGCEERI               |
| MtUGT73K1   | 299 | ---EASKHQ      | FLWV  | ---                              | V                    | ---               | ---                 | ---                    | ---       | ---     | ---         | ---     | ---       | ---     | ---         | ---          | ---      | ---     | KGFVERM               |
| GeUGT73F1   | 297 | ---EASGHEF     | IWV   | ---                              | V                    | ---               | PEKKGKED            | -----                  | ---       | ---     | ---         | ---     | ---       | ---     | ---         | ---          | ---      | ---     | KGFEERK               |
| AtUGT73B1   | 314 | ---DMSGHDF     | VWV   | ---                              | V                    | ---               | NRKGSQ              | -----                  | ---       | ---     | ---         | ---     | ---       | ---     | ---         | ---          | ---      | ---     | EGFEECT               |
| GuUGAT      | 304 | ---EASGKPF     | IWV   | ---                              | V                    | ---               | KKGGA               | -----                  | ---       | ---     | ---         | ---     | ---       | ---     | ---         | ---          | ---      | ---     | EGFEERM               |
| NmUGT73BD1  | 297 | ---ESSGHYF     | IWV   | ---                              | V                    | ---               | KKSEE               | -----                  | ---       | ---     | ---         | ---     | ---       | ---     | ---         | ---          | ---      | ---     | EGFEERI               |
| NmUGT73BD1  | 1   | -----          | ----- | -----                            | -----                | -----             | -----               | -----                  | -----     | ---     | ---         | ---     | ---       | ---     | ---         | ---          | ---      | ---     | MTAQFHVVFFP-LM-AQGLIP |

|             |     |     |         |     |     |     |     |     |           |       |       |       |           |                  |          |           |     |
|-------------|-----|-----|---------|-----|-----|-----|-----|-----|-----------|-------|-------|-------|-----------|------------------|----------|-----------|-----|
| NtTOGT1     | 304 | --- | EASGQEF | I   | WV  | -   | V   | --- | RTELD     | ----- | ----- | ----- | NEDWLP    | ---              | EGFEERT  | -         |     |
| BvUGT73A4   | 310 | --- | EASGKDF | I   | WV  | -   | V   | --- | RNEDD     | ----- | ----- | ----- | -----     | ---              | LGEFEQRM | -         |     |
| Db5-GT      | 311 | --- | EASGQDF | I   | WA  | -   | V   | --- | RGDHG     | ----- | ----- | ----- | QGNSEEWLP | ---              | PGYEHRL  | -         |     |
| AtUGT86A1   | 311 | --- | LLSGISF | I   | WV  | -   | L   | --- | RPDIV     | ----- | ----- | ----- | GSNVPDFLP | ---              | AGFVDQA  | -         |     |
| ZmUGFT1     | 314 | --- | EASGAPF | L   | WS  | -   | L   | --- | REDSW     | ----- | ----- | T     | ---       | ---              | PGFLDRA  | -         |     |
| CteUGT78K6  | 290 | --- | EESGFPF | V   | WA  | -   | L   | --- | KESLL     | ----- | ----- | ---   | ---       | SILP             | ---      | KGFVERT   | -   |
| AtUGT78D1   | 297 | --- | ESSKVPF | V   | WS  | -   | L   | --- | KEKNM     | ----- | ----- | ---   | ---       | VHLP             | ---      | KGFLDRT   | -   |
| CoUGT78B3   | 298 | --- | EASGVPF | L   | WS  | -   | L   | --- | KDSVK     | ----- | ----- | ---   | ---       | LHLP             | ---      | HGFLERT   | -   |
| MtUGT78G1   | 299 | --- | EECGFPF | I   | WS  | -   | F   | --- | RGDPK     | ----- | ----- | ---   | ---       | EKLP             | ---      | KGFLERT   | -   |
| LgUGT78J1   | 289 | --- | EACQFPF | L   | WS  | -   | L   | --- | KEQAR     | ----- | ----- | ---   | ---       | ESLP             | ---      | DGFLERT   | -   |
| CpPGT11     | 295 | --- | EICNRAF | L   | WV  | -   | V   | --- | RPDIT     | ----- | ----- | ---   | ---       | NDANDAYP         | ---      | EGFRERV   | -   |
| AtUGT83A1   | 312 | --- | ELTKRPV | L   | WV  | -   | -   | --- | ---       | ----- | ----- | ---   | ---       | TGDOQP           | ---      | IKLG      | --- |
| FaUGT75T1   | 292 | --- | VDSGLPV | L   | WV  | -   | I   | --- | RKSGN     | ----- | ----- | ---   | ---       | EGDQETENLIN      | ---      | NTLKKEQ   | -   |
| AtUGT75C1   | 295 | --- | LATNRPF | L   | WV  | -   | I   | --- | REKNP     | ----- | ----- | ---   | ---       | EEKKK            | ---      | NRFLLELI  | -   |
| AtUGT75B1   | 284 | --- | IEGKRF  | L   | WV  | -   | V   | --- | TDKSN     | ----- | ----- | ---   | ---       | RETKTEGEEETEIE   | ---      | KIAGFRHEL | -   |
| AtUGT75D1   | 304 | --- | IQSRRPF | L   | WV  | -   | I   | --- | TDKSY     | ----- | ----- | ---   | ---       | RNKEDEQEKEEDCIS  | ---      | SSEKSFDEI | -   |
| ZmUGT74A1   | 304 | --- | LAAGKPF | L   | WV  | -   | V   | --- | RASDE     | ----- | ----- | ---   | ---       | HQVP             | ---      | RYLLAEA   | -   |
| AsUGT74H5   | 290 | --- | HSSGKAF | L   | WV  | -   | V   | --- | RASEA     | ----- | ----- | ---   | ---       | SKIP             | ---      | DGFQERV   | -   |
| BdUGT74J7   | 309 | --- | CNSGKRF | L   | WV  | -   | V   | --- | RSVDE     | ----- | ----- | ---   | ---       | HKLS             | ---      | EELRGKC   | -   |
| SrUGT74G1   | 300 | --- | IDSVDNF | L   | WV  | -   | I   | --- | KHKEE     | ----- | ----- | ---   | ---       | GKLP             | ---      | ENLSEVI   | -   |
| AtUGT74B1   | 301 | --- | QESDLNF | L   | WV  | -   | I   | --- | KEAHI     | ----- | ----- | ---   | ---       | AKLP             | ---      | EGFVEST   | -   |
| RsUGT74R1   | 291 | --- | ENLQTRF | L   | WV  | -   | V   | --- | RETEM     | ----- | ----- | ---   | ---       | AKLP             | ---      | SEFVEWN   | -   |
| LuUGT74S1   | 300 | --- | KNSNHYF | L   | WV  | -   | V   | --- | RESEV     | ----- | ----- | ---   | ---       | AKLP             | ---      | KEYEYS    | --- |
| AtUGT74F1   | 290 | --- | SNFSY   | L   | WV  | -   | V   | --- | RASEE     | ----- | ----- | ---   | ---       | SKLP             | ---      | PGFLETV   | -   |
| SgUGT74AC1  | 295 | --- | KETGKFF | L   | WV  | -   | V   | --- | RDTEA     | ----- | ----- | ---   | ---       | EKLP             | ---      | PNFVESV   | -   |
| AtUGT74C1   | 298 | --- | SQTGYHF | L   | WS  | -   | V   | --- | RESER     | ----- | ----- | ---   | ---       | SKLP             | ---      | SGFIEEA   | -   |
| AtUGT74D1   | 296 | --- | KQTGHNF | L   | WV  | -   | V   | --- | RETET     | ----- | ----- | ---   | ---       | EKLP             | ---      | SNYIEDI   | -   |
| AtUGT74E2   | 296 | --- | KQSGRFF | L   | WV  | -   | V   | --- | RETET     | ----- | ----- | ---   | ---       | HKLP             | ---      | RNYVEEI   | -   |
| AtUGT84B1   | 295 | --- | KNRGLPF | L   | WV  | -   | I   | --- | RPKEK     | ----- | ----- | ---   | ---       | AQNVAVLQ         | ---      | EMVKE     | --- |
| DgphBAGT    | 305 | --- | LNCGQPF | L   | WV  | -   | V   | --- | RPPPK     | ----- | ----- | ---   | ---       | ESSKGGGRLP       | ---      | DWLVOQA   | -   |
| MtUGT84F1   | 299 | --- | LDSQVTF | L   | WA  | -   | -   | --- | KKQHD     | ----- | ----- | ---   | ---       | DLP              | ---      | YGFLEET   | -   |
| PtUF6CGT1   | 306 | --- | LNSEVSF | L   | WV  | -   | L   | --- | RPPSK     | ----- | ----- | ---   | ---       | RIGTEPHVLP       | ---      | EEFWEKA   | -   |
| PgUGT84A23  | 301 | --- | LNSGVNF | L   | WV  | -   | M   | --- | KPPHK     | ----- | ----- | ---   | ---       | DSGYVLTLP        | ---      | EGFLEKA   | -   |
| PgUGT84A24  | 300 | --- | LNSGLNF | L   | WV  | -   | M   | --- | KPPHK     | ----- | ----- | ---   | ---       | DSGYQLLTL        | ---      | EGFLEKA   | -   |
| AtUGT76E1   | 289 | --- | RNSNQPF | L   | WV  | -   | I   | --- | RPGSI     | ----- | ----- | ---   | ---       | PGSEWTESLP       | ---      | EEFSRLV   | -   |
| AtUGT76D1   | 286 | --- | VQSNQPF | L   | WV  | -   | I   | --- | RPGSI     | ----- | ----- | ---   | ---       | NGQESLDFLP       | ---      | EQFNQTV   | -   |
| SrUGT76G1   | 300 | --- | VDSKQSF | L   | WV  | -   | V   | --- | RPGSV     | ----- | ----- | ---   | ---       | KGSTWVEPLP       | ---      | DGF       | --- |
| VvGT15      | 320 | --- | ANSNQPF | L   | WV  | -   | V   | --- | RPGSV     | ----- | ----- | ---   | ---       | RGSOWIEQLP       | ---      | ETFMDTV   | -   |
| AtUGT76C1   | 296 | --- | RNTNQSF | L   | WV  | -   | V   | --- | RPGSV     | ----- | ----- | ---   | ---       | HGRDWIESLP       | ---      | SGFMESL   | -   |
| AtUGT76B1   | 286 | --- | RNSNQPF | L   | WV  | -   | V   | --- | RPGLI     | ----- | ----- | ---   | ---       | HGKEWIEILP       | ---      | KGFIKNL   | -   |
| CsUGT76F1   | 288 | --- | ANCKLPF | L   | WV  | -   | V   | --- | RPGLT     | ----- | ----- | ---   | ---       | RGSDCLEPLP       | ---      | SGFMEMV   | -   |
| OsUGT709A4  | 313 | --- | VAAGHPF | L   | WV  | -   | L   | --- | RPDMV     | ----- | ----- | ---   | ---       | TARLQ            | ---      | HADLQEAVA | -   |
| SrUGT85C2   | 320 | --- | ANSNHYF | L   | WV  | -   | I   | --- | RSNLV     | ----- | ----- | ---   | ---       | IGENAVLP         | ---      | PELEEHI   | -   |
| CoUGT85N1   | 318 | --- | ANSMCPF | L   | WV  | -   | I   | --- | RPDIL     | ----- | ----- | ---   | ---       | DRASGIVS         | ---      | EDYKKEI   | -   |
| MeUGT85K4   | 320 | --- | ANSKHPF | L   | WV  | -   | V   | --- | RPDVV     | ----- | ----- | ---   | ---       | MGESAVLP         | ---      | EEFYEEI   | -   |
| AtUGT85A1   | 324 | --- | AGSGKEF | L   | WV  | -   | I   | --- | RPDLV     | ----- | ----- | ---   | ---       | AGEEAMVP         | ---      | PDFLMET   | -   |
| MtUGT85H2   | 321 | --- | ANCKKSF | L   | WV  | -   | I   | --- | RPDLV     | ----- | ----- | ---   | ---       | IGGSVIFS         | ---      | SEFTNEI   | -   |
| MdUGT71K1   | 302 | --- | EQSGQRF | L   | WS  | -   | L   | --- | RMPSP     | ----- | ----- | ---   | ---       | KGIVPSDCSNLEEVLP | ---      | DGFLERT   | -   |
| AtUGT89A2   | 308 | --- | EKSMTRF | V   | WV  | -   | V   | --- | KKDPI     | ----- | ----- | ---   | ---       | P                | ---      | DGFEDRV   | -   |
| AtUGT89C1   | 267 | --- | EKSSVRF | I   | WA  | -   | V   | --- | RDAAK     | ----- | ----- | ---   | ---       | KVNSSDNSVEEDVIP  | ---      | AGFEERV   | -   |
| AtUGT89B1   | 306 | --- | EKSGVHF | I   | WA  | -   | V   | --- | KEPVE     | ----- | ----- | ---   | ---       | KDSTRGNIL        | ---      | DGFDDRV   | -   |
| NmUGT89P1   | 301 | --- | EISGVHF | I   | L   | C   | V   | --- | KLHQE     | ----- | ----- | ---   | ---       | IS               | ---      | KEYEDRV   | -   |
| AtUGT92A1   | 309 | --- | ESSEKNF | I   | WV  | -   | V   | --- | RPPIG     | ----- | ----- | ---   | ---       | VEVKSEFDVKGYLP   | ---      | EGFEERI   | -   |
| GbUGT92K1   | 319 | --- | EASQQAF | V   | WA  | -   | L   | --- | RPPVG     | ----- | ----- | ---   | ---       | TTELSSDHLP       | ---      | HGFEERM   | -   |
| GmUGT92G4   | 312 | --- | EESGKSF | I   | WV  | -   | I   | --- | RPPVG     | ----- | ----- | ---   | ---       | FDINGEFSAEWLP    | ---      | KGFEESM   | -   |
| PoUGT90A7   | 303 | --- | EESGVNF | L   | WA  | -   | V   | --- | VRKYETSAV | ----- | ----- | ---   | ---       | ---              | ---      | DELQERV   | -   |
| AtUGT90A1   | 306 | --- | EDSKVNF | L   | WV  | -   | T   | --- | RKDVE     | ----- | ----- | ---   | ---       | EIIG             | ---      | EGFNDRV   | -   |
| AcUGT73J1   | 292 | --- | EKCNKNF | L   | WV  | -   | V   | --- | RKEAE     | ----- | ----- | ---   | ---       | GDDVSEKEWMP      | ---      | ENYKERV   | -   |
| MtUGT73P1   | 313 | --- | EDSGHDF | I   | WV  | -   | V   | --- | RKIED     | ----- | ----- | ---   | ---       | AEDGDDGFL        | ---      | SEFEKRM   | -   |
| SrUGT73E1   | 316 | --- | ESINRPF | I   | WC  | -   | V   | --- | RNETD     | ----- | ----- | ---   | ---       | ELKTWFL          | ---      | DGFEERV   | -   |
| CpPGT4      | 306 | --- | EASNKPF | V   | WV  | -   | I   | --- | RGVSK     | ----- | ----- | ---   | ---       | LEALEKWL         | ---      | QENFEERI  | -   |
| AtUGT73C1   | 309 | --- | EESQRPF | I   | WV  | -   | I   | --- | RGWEK     | ----- | ----- | ---   | ---       | YNELLEWIS        | ---      | ESGYKERI  | -   |
| CpPGT2      | 306 | --- | EASNRPF | I   | WV  | -   | I   | --- | REGET     | ----- | ----- | ---   | ---       | SKELKKWV         | ---      | EDGFEERI  | -   |
| PjGAT       | 314 | --- | ESSKHPF | I   | WV  | -   | I   | --- | KEGER     | ----- | ----- | ---   | ---       | FQELEKWL         | ---      | EEFEERI   | -   |
| CtiUGT73AE1 | 310 | --- | ESSNRPF | I   | WV  | -   | I   | --- | RAGDR     | ----- | ----- | ---   | ---       | ATEIEEWIT        | ---      | ETGFEERT  | -   |
| CaUGT73AH1  | 316 | --- | EMSGYPF | I   | WA  | -   | L   | --- | RPGIK     | ----- | ----- | ---   | ---       | HKEIEKVI         | ---      | EEGFEERV  | -   |
| PzGAT2      | 311 | --- | EASERPF | V   | WV  | -   | V   | --- | RAGGK     | ----- | ----- | ---   | ---       | QKEIEKWIL        | ---      | EEGFEEST  | -   |
| AcUGT73G1   | 304 | --- | EGSGHAF | I   | WV  | -   | V   | --- | RDDGD     | ----- | ----- | ---   | ---       | EQWMP            | ---      | EGCEERI   | -   |
| MtUGT73K1   | 299 | --- | EASKHQF | L   | WV  | -   | V   | --- | HG        | ----- | ----- | ---   | ---       | KEGEEDNWLP       | ---      | KGFVERM   | -   |
| GeUGT73F1   | 297 | --- | EASGHEF | I   | WV  | -   | V   | --- | PEKKGKED  | ----- | ----- | ---   | ---       | ESEHEKWKMP       | ---      | KGFEERK   | -   |
| AtUGT73B1   | 314 | --- | DMSGHDF | V   | WV  | -   | V   | --- | NRKGSQ    | ----- | ----- | ---   | ---       | VEKEDWLP         | ---      | EGFEERT   | -   |
| GuUGAT      | 304 | --- | EASGKPF | I   | WV  | -   | V   | --- | KKGGA     | ----- | ----- | ---   | ---       | KSEGEKLEWLP      | ---      | EGFEERM   | -   |
| NmUGT73BD1  | 297 | --- | ESSGHYF | I   | WV  | -   | V   | --- | KKSEE     | ----- | ----- | ---   | ---       | AEKWLP           | ---      | EGFEERI   | -   |
| NmUGT73BD1  | 1   | --- | ---     | --- | --- | --- | --- | --- | ---       | ----- | ----- | ---   | ---       | MTAQFHVVFFP      | ---      | LM-AQGLIP | -   |

|             |     |       |                 |                     |                        |                          |
|-------------|-----|-------|-----------------|---------------------|------------------------|--------------------------|
| AtUGT81A1   | 407 | ----  | PVQVKGFIKMEE    | -----               | -----                  | CMGACDCIITKAGPGTIAEAMI   |
| AtUGT80A2   | 473 | RTKQR | GIINKGWGGLGNL   | -KEPKDFVYLLDNVPHDWL | FFPRCKAVVHHGGAGTAAAGLK |                          |
| AtUGT80B1   | 436 | DTEQR | GIVDRGWGGLGNL   | LATEVPENVFLVEDCPHDW | LFPQCSAVVHHGGAGTATGLK  |                          |
| OsZOGT3     | 337 | --EGT | GMVITGWAPQLEI   | -----               | -----                  | LAHGATAAFMSHCGWNSTMESMS  |
| OsZOGT1     | 329 | --EGV | GLVITGWAPQLEI   | -----               | -----                  | LAHGATAAFMSHCGWNSTMESLS  |
| ZmcisZOG1   | 333 | --EGT | GLVITGWAPQLEI   | -----               | -----                  | LAHGATAAFMSHCGWNSTIESLS  |
| GmUGT79A6   | 330 | --KNR | GVVHSGWVFOQLV   | -----               | -----                  | LKHSVSGCYVCHGGFSSVIEAMV  |
| AtUGT79B6   | 315 | --KAR | GVVWGSWVQPLI    | -----               | -----                  | LAHPSIGCFVSHCGFGSMWEALV  |
| GmUGT91H9   | 328 | --KER | GIVWKGWAPQIKI   | -----               | -----                  | LGHAAIGGCI THCGTNSLVEMLN |
| ZmUGT91L1   | 295 | --RGR | GSVVTGWVPTSI    | -----               | -----                  | LGHGAVAAAFMMHCGWGSTIEALQ |
| PoUGT95A1   | 410 | --GNR | GLIITGWAPQLLI   | -----               | -----                  | LSHPSTGGFLSHCGWNSTAEAIG  |
| MtUGT95B4   | 356 | --GNR | GLIIRGWAPQLLI   | -----               | -----                  | LSHTSTGGFLSHCGWNSTIEAIG  |
| PgUGT95B2   | 388 | --GDR | GLIIRGWAPQLLI   | -----               | -----                  | LSHPSTGGFLSHCGWNSTVEAIG  |
| VvUGT95B6   | 378 | --GKR | GLIIRGWAPQLLI   | -----               | -----                  | LSHPSTGGFLSHCGWNSTVEAIG  |
| AtUGT82A1   | 338 | ITKNQ | GRIVS-WAPQLEV   | -----               | -----                  | LRNDSVGCYVTHCGWNSTVEAVA  |
| VpUGT94F1   | 315 | --KGR | GMVWKWFAPQTRI   | -----               | -----                  | LAHKSIGGFVSHCGWSSITESVY  |
| AtUGT87A1   | 306 | ----  | GVVVS-WCDQLRV   | -----               | -----                  | LCHAAIGGFVTHCGYNSTLEGIC  |
| AtUGT72C1   | 334 | --KDI | GLVVRTWAPQEEI   | -----               | -----                  | LAHKSTGGFVTHCGWNSVLESIV  |
| AtUGT72D1   | 333 | --RGV | GIVVTQWAPQVEI   | -----               | -----                  | LSHRSIGGFVSHCGWSSALESIT  |
| LjUGT72AD1  | 342 | --KGQ | GFLVPHYWANQIEI  | -----               | -----                  | LSTGVIIGGFVCHCGWNSTLESIV |
| AtUGT72B1   | 319 | --KKR | GFVIPFWAPQAV    | -----               | -----                  | LAHPSTGGFLTHCGWNSTLESIV  |
| VvUGT1      | 334 | --QGL | GLVVS-SWAPQVQV  | -----               | -----                  | LSHGSTGGFLTHCGWNSTLETIV  |
| LjUGT72AH1  | 335 | --KGQ | GFVMSGWAPQSAI   | -----               | -----                  | LSHGSIGAFVTHCGWNSILESIV  |
| LjUGT72Z2   | 352 | --KGQ | GLVIPSWAPQTOI   | -----               | -----                  | LSHSSIGGFVTHCGWNSVLESIV  |
| GmUGT72X4   | 333 | --KEK | GLVVASWAPQVQV   | -----               | -----                  | LGHNSVGGFLSHCGWNSTLESVQ  |
| MtUGT72L1   | 343 | --KEE | GFVITSWAPQIQI   | -----               | -----                  | LSHSSVGGFLSHCGWSSSTLESVY |
| PgUGT72BD1  | 344 | --QK  | LGLVPMWAPQREI   | -----               | -----                  | LAHPSIGGFVSHCGWNSTLESLI  |
| AtUGT72E1   | 332 | --HER | GFMVSSWAPQAEI   | -----               | -----                  | LAHQAVGGFLTHCGWNSILESIV  |
| OsUGT706C1  | 328 | --QGR | GFVVKNWAPQSAV   | -----               | -----                  | LQHGAVGAFVTHCGWNSLEAIM   |
| OsUGT706D1  | 337 | --ADK | GMVVKSWAPQAKV   | -----               | -----                  | LRHAATAAFVTHCGWNSTLEGIT  |
| MtUGT88E1   | 331 | --KEK | GMVVARNWAPQCSI  | -----               | -----                  | LRHSSVGGFVTHCGWNSVLEAIC  |
| VpUGT88D8   | 322 | --KER | GFVIKSWAPQKEV   | -----               | -----                  | LSHESVGGFVTHCGRSSILEAVS  |
| NmUGT88P1   | 343 | --KER | GVIKSWAPQLAI    | -----               | -----                  | LNHDAIGGFVTHCGWNSVLEAIC  |
| AtUGT88A1   | 332 | --EDK | GMVVKSWAPQVPV   | -----               | -----                  | LNHKAVGGFVTHCGWNSILEAVC  |
| VvGT7       | 346 | --KER | GLMVKSWAPQVAV   | -----               | -----                  | LNHASVGGFVTHCGWNSVLEAVC  |
| MdUGT88F1   | 350 | --ADR | GMVVKSWAPQVVV   | -----               | -----                  | LKKESVGGFVTHCGWNSVLEAVV  |
| ScUGT5      | 341 | --KDR | GMVVESWVPOVKV   | -----               | -----                  | LEHPAVGGFVTHCGWNSVLEAVM  |
| OsUGT707A2  | 350 | --KGR | GMVWPTWAPQKDI   | -----               | -----                  | LAHAAVGGFVTHCGWNSTLESIV  |
| AtUGT71B1   | 333 | --VEI | GKIIS-WAPQVDV   | -----               | -----                  | LNSPAIGAFVTHCGWNSILESIV  |
| MdUGT71A15  | 340 | --ATV | GKVIG-WAPQAAI   | -----               | -----                  | LGHPATGGFVSHCGWNSTLESIV  |
| BvUGT71F1   | 352 | --AK  | IGKIIS-WAPQVSI  | -----               | -----                  | LSHPVSGGFVSHCGWNSTLESIV  |
| Db6-GT      | 339 | --SHK | GKIIG-WAPQVSI   | -----               | -----                  | LAHKAVGGFVSHCGWNSTLESIV  |
| AtUGT71C1   | 343 | --MDQ | GIVCG-WAPQVEI   | -----               | -----                  | LAHKAVGGFVSHCGWNSILESIV  |
| AtUGT71C4   | 341 | --AGR | GLVCG-WAPQVEV   | -----               | -----                  | LAHKAIGGFVSHCGWNSTLESIV  |
| AtUGT71D1   | 330 | --DGR | GMICG-WSQVEI    | -----               | -----                  | LAHKAVGGFVSHCGWNSILESIV  |
| FaUGT71W2   | 337 | --KGV | GMLCG-WAPQVEV   | -----               | -----                  | LGHKSTGGFVSHCGWNSILESIV  |
| MtUGT71G1   | 329 | ELEGK | GMICG-WAPQVEV   | -----               | -----                  | LAHKAIGGFVSHCGWNSILESIV  |
| MdUGT71K1   | 341 | --NGK | KGLICGWAPQVEI   | -----               | -----                  | LAHSATGGFLSHCGWNSILESIV  |
| AtUGT89A2   | 332 | --SGR | GLVVIRGWVSQLAV  | -----               | -----                  | LRHVAVGGFLSHCGWNSVLEGIT  |
| AtUGT89C1   | 305 | --KEK | GLVIRGWAPQTM    | -----               | -----                  | LEHRAVGSYVTHLWGVSVLEGMV  |
| AtUGT89B1   | 338 | --AGR | GLVIRGWAPQVAV   | -----               | -----                  | LRHRAVGAFLTHCGWNSVVEAVV  |
| NmUGT89P1   | 326 | --AGR | GLIIRGWAPQVAI   | -----               | -----                  | LRHRAVGAFLTHCGWNSILEGIA  |
| AtUGT92A1   | 346 | TRSER | GLLVKKWAPQVDI   | -----               | -----                  | LSHKATCVFLSHCGWNSILESIV  |
| GbUGT92K1   | 352 | RANNK | GFLIRGWAPQLMI   | -----               | -----                  | LSHPSTGGFLSHCGWNSVLESIV  |
| GmUGT92G4   | 348 | RDTKR | GLLVHKWGPQLEI   | -----               | -----                  | LSHTSTGAFVSHCGWNSVLESIV  |
| PoUGT90A7   | 329 | --GER | GLIVTEWVDQMEI   | -----               | -----                  | LKHESVKGFFVSHCGWNSVLESIC |
| AtUGT90A1   | 333 | --RES | GMIVRDWVDQMEI   | -----               | -----                  | LSHESVKGFFVSHCGWNSVLESIC |
| AcUGT73J1   | 326 | --GER | GLVVKGWVPTTV    | -----               | -----                  | LDHKSVMGFVTHCGWNSLOESTC  |
| MtUGT73P1   | 345 | --KER | NKGYLIWGWAPQLLI | -----               | -----                  | LEHGAVGAVVTHCGWNTIMESVN  |
| SrUGT73E1   | 346 | --RDR | GLIVHWGAPQVLI   | -----               | -----                  | LSHPSTGGFLTHCGWNSVLESIV  |
| CpPGT4      | 339 | --KGR | GLLIRGWAPQVLI   | -----               | -----                  | LSHPAVGGFVTHCGWNSILEGIV  |
| AtUGT73C1   | 342 | --KER | GLLITGWSPQMLI   | -----               | -----                  | LTHPAVGGFVTHCGWNSTLEGIT  |
| CpPGT2      | 339 | --KGR | GLVIWGWAPQVLI   | -----               | -----                  | LSHPSIGGFVTHCGWNSVLESIV  |
| PjGAT       | 347 | --KRR | GLLIKGWAPQVLI   | -----               | -----                  | LSHPAIKAFVTHCGWNSILEGIV  |
| CtiUGT73AE1 | 343 | --KDR | GLLIRDWAPQLLI   | -----               | -----                  | LSHPVSGGFVTHCGWNSILEGIV  |
| CaUGT73AH1  | 349 | --KGR | GMLIWGWAPQVLI   | -----               | -----                  | LSHRAIGGFVTHCGWNSILEGIV  |
| PzGAT2      | 344 | --KGR | GLLIRGWAPQVLI   | -----               | -----                  | LSHPAIIGGFVTHCGWNSILEGIV |
| AcUGT73G1   | 332 | --EGR | GLIIKGWAPQMMI   | -----               | -----                  | LNHEAVGGYVTHCGWNSILEGIV  |
| MtUGT73K1   | 330 | KEEKK | GMLIKGWVPAALI   | -----               | -----                  | LDHPSIGGFVTHCGWNSVLESIV  |
| GeUGT73F1   | 334 | ----  | KGLIMRGWAPQVLI  | -----               | -----                  | LSHRAVGAFLTHCGWNSVLEAVS  |
| AtUGT73B1   | 346 | --KGK | GLIIRGWAPQVLI   | -----               | -----                  | LEHKAIGGFVTHCGWNSILEGIV  |
| GuUGAT      | 338 | GESNK | GLIIRGWAPQVMI   | -----               | -----                  | LDHGAVGGFVTHCGWNSILEGIV  |
| NmUGT73BD1  | 326 | --KDK | GLIIRGWAPQVSI   | -----               | -----                  | LEQESTGGFVTHCGWNSILEAIV  |
| NmUGT73BD1  | 1   | ----  | -----           | -----               | -----                  | MTAQFHVVFVFP-LM-AQGHLP   |

|             |     |                |                  |                           |
|-------------|-----|----------------|------------------|---------------------------|
| NtTOGT1     | 333 | --KEK--        | GLIIRGWAPQVLI    | LDHESVGAFFVTHCGWNSTLEGV   |
| BvUGT73A4   | 334 | --EGK--        | GLIIRGWAPQVLI    | LEHEVIGAFVTHCGWNSTIEGIA   |
| Db5-GT      | 343 | --Q GK--       | GLIIRGWAPQVLI    | LEHEATGGFLTHCGWNSALEGIS   |
| AtUGT86A1   | 343 | --QDR--        | GLVVQ--WCCQMEV   | ISNPVAVGGFFTHCGWNSILESVW  |
| ZmUGFT1     | 341 | AGTGS--        | GLVVP--WAPQVAV   | LRHPSVGAFFVTHAGWASVLEGV   |
| CteUGT78K6  | 317 | --STR--        | GKVVS--WVPQSHV   | LSHGSVGVFVTHCGANSVMESVS   |
| AtUGT78D1   | 324 | --REQ--        | GIVVP--WAPQVEL   | LKHEFAMGVNVTHCGWNSVLESVS  |
| CoUGT78B3   | 325 | --SER--        | GKVVP--WTPQSR    | LRHPAVGVVIVTHCGWNSIMESIM  |
| MtUGT78G1   | 326 | --KTK--        | GKIVA--WAPQVEI   | LKHSVGVFLTHSGWNSIVCIV     |
| LgUGT78J1   | 316 | --TSF--        | GKIVS--WAPQLQV   | LAHDSVGVFVSHCGWNSIESIS    |
| CpPGT11     | 326 | --AAR--        | GQMIS--WSPQKQF   | LTHPSISCFMSHCGWNSTTEGV    |
| AtUGT83A1   | 332 | --SDR--        | VKVVR--WAPQREV   | LSSGAI GCFVSHCGWNSTLEGAQ  |
| FaUGT75T1   | 326 | ----           | GLIVP--WCSQVEV   | LSHKSVGCCVSHCGWNSTIESLA   |
| AtUGT75C1   | 323 | RGSDR--        | GLVVG--WCSQTAV   | LAHCAVGCFFVTHCGWNSTLESLE  |
| AtUGT75B1   | 323 | --EEV--        | GMIVS--WCSQIEV   | LSHRAVGCFFVTHCGWSTLESV    |
| AtUGT75D1   | 344 | ----           | GMVVS--WCDQFRV   | LNHRSIGCFVTHCGWNSTLESV    |
| ZmUGT74A1   | 331 | --TATGAAMVVP-- | WCPQLDV          | LAHPAVGCFFVTHCGWNSTLEALS  |
| AsUGT74H5   | 317 | --GGR--        | GLVVT--WVAQLEV   | LAHGAIGCFVTHCGWNSTMEALG   |
| BdUGT74J7   | 336 | --NEM--        | GLIVS--WCPQLEV   | LSHKATGCFVTHCGWNSTTEAIV   |
| SrUGT74G1   | 327 | --KTGK--       | GLIVA--WCKQLDV   | LAHESVGCFFVTHCGFNSTLEAIS  |
| AtUGT74B1   | 328 | --KDR--        | ALLVS--WCKQLEV   | LAHESIGCFVTHCGWNSTLEGLS   |
| RsUGT74R1   | 318 | LSSGL--        | GLVVT--WCNQLDI   | LAHETVGCFFVTHCGWNSVLEALC  |
| LuUGT74S1   | 326 | --GEK--        | GLVVS--WCSQLQV   | LASGKVGCFVTHCGWNSTLEALS   |
| AtUGT74F1   | 315 | --DKDK--       | SLVLK--WSPQLQV   | LSNKAIGCFMTHCGWNSTMEGLS   |
| SgUGT74AC1  | 322 | --AEK--        | GLVVS--WCSQLEV   | LAHPVSGCFFVTHCGWNSTLEALC  |
| AtUGT74C1   | 325 | --EEKDS        | GLVAK--WVPQLEV   | LAHESIGCFVSHCGWNSTLEALC   |
| AtUGT74D1   | 323 | --CDK--        | GLIVN--WSPQLQV   | LAHKSIGCFMTHCGWNSTLEALS   |
| AtUGT74E2   | 323 | --GEK--        | GLIVS--WSPQLDV   | LAHKSIGCFVTHCGWNSTLEGLS   |
| AtUGT84B1   | 324 | --GQ--         | GVVLE--WSPQEKI   | LSHEAISCFVTHCGWNSTMETVV   |
| DgphBAGT    | 338 | --DGK--        | GLVVQ--WCPQERV   | LAHPVAVCFVTHCGWNSMEILS    |
| MtUGT84F1   | 324 | --SGR--        | GKVVN--WSPQEQV   | LAHPVAVCFVTHCGWNSMEALT    |
| GtUF6CGT1   | 339 | --GDR--        | GKVVQ--WSPQEQV   | LAHPATVGFVTHCGWNSTQEAIS   |
| PgUGT84A23  | 334 | --GDR--        | GKVVQ--WSPQEQV   | LAHPATVGFVTHCGWNSMEALT    |
| PgUGT84A24  | 333 | --GDK--        | GKVVQ--WSPQEQV   | LAHPVAVCFVTHCGWNSMEALS    |
| AtUGT76E1   | 322 | --SER--        | GYIVK--WAPQIEV   | LRHPAVGGFFVSHCGWNSTLESIG  |
| AtUGT76D1   | 319 | --TDGR--       | GFVVK--WAPQKEV   | LRHRAVGGFFVSHCGWNSCLEISIS |
| SrUGT76G1   | 330 | --GER--        | GRIVK--WVPQQEV   | LAHGAIGAFVTHSGWNSTLESVC   |
| VvGT15      | 353 | --GER--        | CHIVK--WAPQKEV   | LGHRAVGGFFVSHCGWNSTLESIS  |
| AtUGT76C1   | 329 | --DGK--        | GKIVR--WAPQLDV   | LAHRATGGFLTHNGWNSTLESIC   |
| AtUGT76B1   | 319 | --EGR--        | CKIVK--WAPQPEV   | LAHRATGGFLTHCGWNSTLEGIC   |
| CsUGT76F1   | 321 | --DGR--        | GHLVK--WAPQQEV   | LAHPAVGAFFVTHNGWNSTLESIC  |
| OsUGT709A4  | 343 | AAAGHSKARVVR-- | WAPQRDV          | LRHRAVGCFFVTHAGWNSTLEAAV  |
| SrUGT85C2   | 351 | --KKR--        | GFIAS--WCSQEKV   | LKHPVSGGFLTHCGWGSTIESLS   |
| CoUGT85N1   | 349 | --GGR--        | GLLVS--WCQQEKV   | LKHPVSGGFLTHCGWNSTLESIC   |
| MeUGT85K4   | 351 | --KDR--        | GLLVS--WVPQDRV   | LQHPAVGVFLSHCGWNSTLESIC   |
| AtUGT85A1   | 355 | --KDR--        | SMLAS--WCPQEKV   | LSHPAIGGFLTHCGWNSILESLS   |
| MtUGT85H2   | 352 | --ADR--        | GLIAS--WCPQDKV   | LNHPVSGGFLTHCGWNSTTESIC   |
| MdUGT71K1   | 341 | --NGK--        | KGLICGWAPQVEI    | LAHSATGGFLSHCGWNSILESLW   |
| AtUGT89A2   | 332 | --SGR--        | GLVVIRGWVSQLAV   | LRHVAVGGFLSHCGWNSVLEGIT   |
| AtUGT89C1   | 305 | --KEK--        | GLVIRGWAPQTM     | LEHRAVGSYVTHLGLWGSVLEGMV  |
| AtUGT89B1   | 338 | --AGR--        | GLVIRGWAPQVAV    | LRHRAVGAFFVTHCGWNSVVEAVV  |
| NmUGT89P1   | 326 | --AGR--        | GLIIRGWAPQVAI    | LRHRAVGAFFVTHCGWNSILEGIA  |
| AtUGT92A1   | 346 | TRSER--        | GLLVKKWAPQVDI    | LSHKATCVFLSHCGWNSILESLS   |
| GbUGT92K1   | 352 | RANNK--        | GFLIRGWAPQLMI    | LSHPSTGGFLSHCGWNSVLESIS   |
| GmUGT92G4   | 348 | RDTKR--        | GLLVHKWGPQLEI    | LSHTSTGAFFVSHCGWNSVLESLS  |
| PoUGT90A7   | 329 | --GER--        | GLIVTEWVDQMEI    | LKHESVKGFFVSHCGWNSVLESIC  |
| AtUGT90A1   | 333 | --RES--        | GMIVRDWDQWEI     | LSHESVKGFFVSHCGWNSQLESIC  |
| AcUGT73J1   | 326 | --GER--        | GLVVKGWVPPQTTV   | LDHKSVMGFVTHCGWNSLQESTC   |
| MtUGT73P1   | 345 | --KERNK        | GYLIWGWAPQLLI    | LEHGAVGAVVTHCGWNTIMESVN   |
| SrUGT73E1   | 346 | --RDR--        | GLIVHWGWAPQVLI   | LSHPVAVGGFLTHCGWNSTIESIT  |
| CpPGT4      | 339 | --KGR--        | GLLIRGWAPQVLI    | LSHPAVGGFLTHCGWNSILEGIS   |
| AtUGT73C1   | 342 | --KER--        | GLLITGWSPQMLI    | LTHPAVGGFLTHCGWNSTLEGIT   |
| CpPGT2      | 339 | --KGR--        | GLVIWGWAPQVLI    | LSHPVAVGGFLTHCGWNSILEGIS  |
| PjGAT       | 347 | --KRR--        | GLLIRGWAPQVLI    | LSHPVAVGGFLTHCGWNSILEGIS  |
| CtiUGT73AE1 | 343 | --KDR--        | GLLIRDWAPQLLI    | LSHPVAVGGFLTHCGWNSILEGIS  |
| CaUGT73AH1  | 349 | --KGR--        | GMLIWGWAPQVLI    | LSHRAVGGFLTHCGWNSTIEGIC   |
| PzGAT2      | 344 | --KGR--        | GLLIRGWAPQVLI    | LSHPAIGGFLTHCGWNSILEGIS   |
| AcUGT73G1   | 332 | --EGR--        | GLIIRGWAPQMI     | LNHEAVGGFLTHCGWNSILEGIS   |
| MtUGT73K1   | 330 | KEEKK--        | GMLIKGWVPPQALI   | LDHPSVGGFLTHCGWNSVLEAIS   |
| GeUGT73F1   | 334 | ----           | K--GLIMRGWAPQVLI | LSHRAVGAFFVTHCGWNSVLEAIS  |
| AtUGT73B1   | 346 | --KGK--        | GLIIRGWAPQVLI    | LEHKAIGGFLTHCGWNSLLEGVA   |
| GuUGAT      | 338 | GESNK--        | GLIIRGWAPQVMI    | LDHGAVGGFFVTHCGWNSTLEGVC  |
| NmUGT73BD1  | 326 | --KDK--        | GLIIRGWAPQVSI    | LEQESTGGFFVTHCGWNSTLEAIS  |
| NmUGT73BD1  | 1   | ----           | ----             | MTAQFHVVFP-LM-AQGHLP      |



|             |     |                  |                  |                    |                            |
|-------------|-----|------------------|------------------|--------------------|----------------------------|
| NtTOGT1     | 372 | GGVPMVMTWPFVFAEQ | -FFNEKLVTEVLKKTG | -AGVGSIQWKR        | -----ASEGVKREA             |
| BvUGT73A4   | 373 | AGVPMVMTWPFVFAEQ | -FLNEKLITRVLRI   | -IPV---GAKKW       | -----DCKPSEEYVVKKND        |
| Db5-GT      | 382 | AGVPMVMTWPFVFAEQ | -FHNEQLLTQILKVG  | -VAV---GSKKW       | -----TLKPSIEDVIAKED        |
| AtUGT86A1   | 381 | CGLPLLCYPPLLTDO  | -FTNRKLVVDDWCIG  | -INL---CEKKT       | -----ITRDQ                 |
| ZmUFGT1     | 381 | SGVPMACRPFPGDQ   | -RMNARSVAHVWGF   | -AAF---EGA         | -----MTSAG                 |
| CteUGT78K6  | 355 | NGVPMICRPFPGDQ   | -GIAARVIQDIWEVG  | -VIV---EGK         | -----VFTKNG                |
| AtUGT78D1   | 362 | AGVPMIGRPIILADN  | -RLNGRAVEVWVKVG  | -VMM---DNGV        | -----FTKEG                 |
| CoUGT78B3   | 363 | GAVPIVYRPFPGDH   | -MLISRFSVDIWKIG  | -VSA---GD          | -----VVFTKDG               |
| MtUGT78G1   | 364 | GGVPMISRPFPGDQ   | -GLNTILTETVLEIG  | -VGV---DNGV        | -----LTKES                 |
| LgUGT78J1   | 354 | SGVPMICRPFPGDQ   | -KLNSRMIQDSWKIG  | -LRI---EGGV        | -----FSKSG                 |
| CpPGT11     | 364 | NGVPFLLCWPFFADQ  | -FMNTTYICDVWKVG  | -LRL-ERNQSGI       | -----IGREE                 |
| AtUGT83A1   | 370 | NGIPFLCIPYFADQ   | -FINKAYICDVWKIG  | -LGL-ERDARGV       | -----VPRLE                 |
| FaUGT75T1   | 361 | AGVPVVGCPIHFADQ  | -TTNAKLVEELWGS   | -VRA-RANEEGV       | -----IERAE                 |
| AtUGT75C1   | 363 | SGVPMVAFPPQFADQ  | -CTTAKLVEDTWRI   | -VKV-KVGEEDG       | -----VDGEE                 |
| AtUGT75B1   | 361 | LGVPVVAFPQWSDQ   | -PTNAKLLAESWKTG  | -VRV-RENKDGL       | -----VERGE                 |
| AtUGT75D1   | 379 | SGVPMVAFPPQWSDQ  | -MTNAKLLDCWKTG   | -VRVMEKKEEG        | -----VVVVDSEE              |
| ZmUGT74A1   | 371 | FGVPMVAMALWTDQ   | -PTNARNVELAWGAG  | -VRARRDAGAGV       | -----FLRGE                 |
| AsUGT74H5   | 355 | AGVPMVAVPQWSDQ   | -PTNAKFVEDVWCVG  | -VRA-RRDPEGV       | -----VRRRE                 |
| BdUGT74J7   | 374 | TGVPVLLAMPQWTDQ  | -PTTAKYVESAWGIG  | -VRV-HRDNEGV       | -----VRKEE                 |
| SrUGT74G1   | 366 | LGVPVVAFPQFSDQ   | -TTNAKLLDEILG    | -VRV-KADENGI       | -----VRRGN                 |
| AtUGT74B1   | 366 | LGVPVVAFPQWSDQ   | -MNDAKFVEEVWVG   | -YRA-KEEAGEV       | -----IVKSEE                |
| RsUGT74R1   | 358 | LGVPVVAFPQWSDQ   | -PTNAKFVEDVWCVG  | -VRA-KEDEDGI       | -----VKSMV                 |
| LuUGT74S1   | 364 | LGVPVVAFPQWSDQ   | -LTNAKFIKDVWKTG  | -VRAEADDGKGI       | -----MWGMIKREV             |
| AtUGT74F1   | 354 | LGVPVVAFPQWTDQ   | -PMNAKYIQDVWKVG  | -VRVKAEEKESGI      | -----CKREE                 |
| SgUGT74AC1  | 360 | LGVPVVAFPQWADQ   | -VTNAKFLVDVWVG   | -KRV-KRNEQRL       | -----ASKEE                 |
| AtUGT74C1   | 365 | LGVPVVAFPQWTDQ   | -PTNAKFIEDVWKTG  | -VRV-RTDGEGL       | -----SSKEE                 |
| AtUGT74D1   | 361 | LGVALIGMPAYS     | -PTNAKFIEDVWVG   | -VRV-KADQNGF       | -----VPKEE                 |
| AtUGT74E2   | 361 | LGVPVVAFPQWTDQ   | -PTNAKFMQDVWVG   | -VRV-KAEGDGF       | -----VRRRE                 |
| AtUGT84B1   | 361 | AGVPMVVAFPQWTDQ  | -PIDARLLVDVFGIG  | -VRMRNDSVDGE       | -----LKVEE                 |
| DgPHBAGT    | 376 | SGVPMVVAFPQWTDQ  | -VTNAKFLTDVYGVG  | -VRL-LRSENDL       | -----NTFSSER               |
| MtUGT84F1   | 362 | LGVPVVAFPQWTDQ   | -LTNAKFLVDVYGVG  | -IRL-ARGERKL       | -----VRRDD                 |
| GtUF6CGT1   | 377 | SGVPMVVAFPQWTDQ  | -VTNAKFLVEEFKVG  | -VRL-GRGELEN       | -----RIITRDE               |
| PgUGT84A23  | 372 | SGMPVVAFPQWGDQ   | -VTDAKYLVDVFKVG  | -VRM-CRGEAED       | -----KLITRDV               |
| PgUGT84A24  | 371 | SGMPVVAFPQWGDQ   | -VTDAKYLVDVFKVG  | -VRM-CRGEAEN       | -----KLIMRDV               |
| AtUGT76E1   | 360 | EGVPMICRPFPGDQ   | -KVNARYLERVWRIG  | -VQL---EGE         | -----LDKGT                 |
| AtUGT76D1   | 358 | SGVPMICRPFPGDQ   | -RVNTRLMSHVWQTA  | -YEI---EGE         | -----LERGA                 |
| SrUGT76G1   | 368 | EGVPMIFSDFGLDQ   | -PLNARYMSDVLKVG  | -VYL---ENGW        | -----ERGE                  |
| VvGT15      | 391 | EGVPMICRPFPGDQ   | -RVNTRYISHVWVG   | -LEL---ESDE        | -----LERVE                 |
| AtUGT76C1   | 367 | EGVPMICRPFPGDQ   | -FVNARFISEVVRV   | -IHL---EGR         | -----IERRE                 |
| AtUGT76B1   | 357 | EAIPMICRPFPGDQ   | -RVNARYINDVWKTG  | -LHL---ENK         | -----VERLV                 |
| CsUGT76F1   | 359 | EGIPMICRPFPGDQ   | -KVNARYVSDVWVG   | -LQL---ENGL        | -----KREE                  |
| OsUGT709A4  | 385 | EGVPTVCWPFVFDQ   | -QINSRFRVGGVWGTG | -LDM---EGE         | -----KDACDAV               |
| SrUGT85C2   | 389 | AGVPMICWPFVFDQ   | -LTNCRYICKWEVVG  | -LEM---EGE         | -----GTKVKRDE              |
| CoUGT85N1   | 387 | EGVPMICWPFVFAEQ  | -QTNCFYICNKWIG   | -MEI---EGE         | -----DFDVKRE               |
| MeUGT85K4   | 389 | GGKPMICWPFVFAEQ  | -QTNCKYACDVWKTG  | -VEL---EGE         | -----STNLKRE               |
| AtUGT85A1   | 393 | CGVPMVCWPFVFAEQ  | -QMNCKFCDEWDVG   | -IEI---GGD         | -----VKREE                 |
| MtUGT85H2   | 390 | AGVPMICWPFVFAEQ  | -PTDCRFICNEWEIG  | -MEI---EGE         | -----DTNVKRE               |
| MdUGT71K1   | 380 | HGVPIATWPMYAEQ   | -QLNAFRMVRELGMA  | -LEM-RLDYKAG       | -----SADVVGAD              |
| AtUGT89A2   | 371 | SGAVILGWPMYAEQ   | -FVNARLLVEHLGVA  | -VRV-CEGGETV       | -----PDSDE                 |
| AtUGT89C1   | 344 | GGVMLLAWPMYADH   | -FFNTTLIVDKLRAA  | -VRV---GENRD       | -----SVPDSK                |
| AtUGT89B1   | 377 | AGVLMLTWPMYADH   | -YTDASLVVDELKVG  | -VRA-CEGPDTV       | -----PDPDE                 |
| NmUGT89P1   | 365 | AGVPMITWPMYADH   | -FTNANLLVDELKVA  | -MKA-CEGGDSN       | -----VNPAM                 |
| AtUGT92A1   | 387 | HGVPLLGWPMYAEQ   | -FFNSILMEKHIGVS  | -VEV-ARGKRCE       | -----IKCDD                 |
| GbUGT92K1   | 393 | QGVPIIGWPIYAEQ   | -FYNSKLLVEEVGVV  | -VEL-CRGIDGE       | -----VRKNN                 |
| GmUGT92G4   | 389 | YGVPMIGWPIYADQ   | -PYNVKMLVEEMGVA  | -VEL-TRSTETV       | -----VSREK                 |
| PoUGT90A7   | 368 | SEVPIILAWPMYAEQ  | -PLNTRMVVEELKIG  | -LRVETCDGSVK       | -----GFVKSEG               |
| AtUGT90A1   | 372 | YGVPLLAWPMYAEQ   | -PLNAKMVVEEIKVG  | -VRV-ETEDGSV       | -----KGFVTR                |
| AcUGT73J1   | 365 | AGVPMITWPLFHEQ   | -FINAEFLVETMGIG  | -ERMWEGFRKSE       | -----YRKFDDVIVTAD          |
| MtUGT73P1   | 386 | AGLPPLATWPLFAEQ  | -FFNERLLVDVLKIG  | -VAV---GAKERNWNEFG | -----DDVVKRED              |
| SrUGT73E1   | 385 | AGVPMITWPLFAEQ   | -FLNEAFIVEVLKIG  | -VRI---GVERA       | -----CLFGEEKVGLVKKED       |
| CpPGT4      | 378 | AGVQMLTWPFFADQ   | -FCNEKLIIVNVLRI  | -VSVGVEVPMNF       | -----GEEKIGVLVNKEN         |
| AtUGT73C1   | 381 | SGVPLLWPLFPGDQ   | -FCNEKLAVALKAG   | -VRAGVEESMRW       | -----GEEKIGVLVDDKEG        |
| CpPGT2      | 378 | AGLPPLTWPFFADQ   | -FMNEVFVQILKIG   | -VKVGVEVPMIW       | -----GEEKIGVLMKRDD         |
| PjGAT       | 386 | SGVPMITWPMYAEQ   | -FFNEKLIIVDILRI  | -IKVGVQVSVRW       | -----GEEKIGVLVKREQ         |
| CtiUGT73AE1 | 382 | AGVPLVTWPLFAEQ   | -FLNEKLVVEVLG    | -VPVGAPRVVHW       | -----GMEDKFGVTVRSDQ        |
| CaUGT73AH1  | 388 | AGVPMITWPLFAEQ   | -FVNEKFLVQVVKTG  | -VRVGVEAVVDM       | -----GYKEEFGVKVVKRED       |
| PzGAT2      | 383 | SGVPMITWPLFAEQ   | -FFNEKLVVQVLETG  | -VSVGAKEVMPL       | -----GEEKFGVKVRSKN         |
| AcUGT73G1   | 371 | VGLPFTWPLFAEQ    | -PYNERLIVDVLKVG  | -VAVGVKEYSFD       | -----PEERTVIEAGS           |
| MtUGT73K1   | 371 | SGVPMITWPMYAEQ   | -YYNEKLVTEVHRIG  | -VEV---GAAEW       | -----SMSPYDAKTVVRAER       |
| GeUGT73F1   | 371 | AGVPMITWPMYAEQ   | -FYNEKLVTVQVRIG  | -VEV---GAAEW       | -----SAIFGEREKVVKRES       |
| AtUGT73B1   | 385 | AGLPMTWPLFAEQ    | -FYNEKLVTVQVLKIG | -VSVGVKMMQV        | -----VGDVFSREK             |
| GuUGAT      | 379 | AGVPMITWPMYAEQ   | -FYNAKFLTDIVKIG  | -VGV---GVQTW       | -----IGMGGGEPVKKEV         |
| NmUGT73BD1  | 365 | AGVPMATLPTFAEQ   | -PFNEKLLTRVLKIG  | -IPVGSPLSNRA       | -----VSLVKRE               |
| NmUGT73BD1  | 1   |                  |                  |                    | -----MTAQFHVVFFP-LM-AQGHLP |





|             |     |                   |                   |                           |                   |                         |                         |                         |                                             |
|-------------|-----|-------------------|-------------------|---------------------------|-------------------|-------------------------|-------------------------|-------------------------|---------------------------------------------|
| NtTOGT1     | 420 | I A K A I K R V M | --VS              | E E A D                   | --G F R N R A K A | ----                    | Y K E M A R K A I E     | -E-G-                   | G S S Y T G L T T L L E                     |
| BvUGT73A4   | 423 | I E K A L R E V M | --E G N E A E     | --E R R T R A K E         | ----              | Y K E M A W K A L Q     | -E-G-                   | G S S Y S D L S A L I D |                                             |
| Dt5-GT      | 432 | I E K A V R E V M | --V G E E G E     | --E R R R R A K K         | ----              | L K E M A W R A I E     | -E-G-                   | G S S Y S D L S A L I E |                                             |
| AtUGT86A1   | 422 | V S A N V K R L M | --N G E T S S     | --E L R N N V E K         | ----              | V K R H L K D A V T T V | ----                    | G S S E T N F N L F V S |                                             |
| ZmUGFT1     | 420 | V A A A V E E L L | --R G E E G A     | --R M R A R A K V         | ----              | L Q A L V A E A F G     | -P-G-                   | G E C R K N F D R F V E |                                             |
| CteUGT78K6  | 395 | F V K S L N L I L | --V Q E D G K     | --K I R D N A L K         | ----              | V K Q I V Q D A V G P H | ----                    | G Q A A E D F N T L V E |                                             |
| AtUGT78D1   | 402 | F E K C L N D V F | -V--H D D G K     | --T M K A N A K K         | ----              | L K E K L Q E D F S     | -M-K-                   | G S S L E N F K I L L D |                                             |
| CoUGT78B3   | 403 | V V N A L D T I L | --H K E E G K     | --R I R E S V G M         | ----              | W K L K A T Q V V G D S | ----                    | G S T T H N L D K L L K |                                             |
| MtUGT78G1   | 404 | I K K A L E L T M | --S S E K G G     | --I M R Q K I V K         | ----              | L K E S A F K A V E Q N | ----                    | G T S A M D F T T L I Q |                                             |
| LgUGT78J1   | 394 | A M E A L N R I M | --T G D E G K     | --I I R E N V N V         | ----              | L K E K A T T A V E P Q | ----                    | G S S S K N F Q K L L Q |                                             |
| CpPGT11     | 407 | I K N K V D Q V L | ----              | G D Q                     | --N F K A R A L K | ----                    | L K E K A L S S V R     | -E-G-                   | G S S N K A I Q N F V Q                     |
| AtUGT83A1   | 413 | V K K K I D E I M | -R--D G G         | --E Y E E R A M K         | ----              | V K E I V M K S V A     | -K-D-                   | G I S C E N L N K F V N |                                             |
| FaUGT75T1   | 404 | I K R C L E V V M | --G D G V R G E   | --E M R R N A Q K         | ----              | W K S L A M K A V N E S | ----                    | G S S D D N L R N F V R |                                             |
| AtUGT75C1   | 406 | I R R C L E K V M | --S G G E E A E   | --E M R E N A E K         | ----              | W K A M A V D A A A     | -E-G-                   | G P S D L N L K G F V D |                                             |
| AtUGT75B1   | 404 | I R R C L E A V M | ----              | E E K S V                 | --E L R E N A K K | ----                    | W K R L A M E A G R     | -E-G-                   | G S S D K N M E A F V E                     |
| AtUGT75D1   | 426 | I R R C I E E V M | ----              | E D K A E                 | --E F R G N A T R | ----                    | W K D L A A E A V R     | -E-G-                   | G S S F N H L K A F V D                     |
| ZmUGT74A1   | 415 | V E R C V R A V M | --D G G E A A S   | --A A R K A A G E         | ----              | W R D R A R A A V A     | -P-G-                   | G S S D R N L D E F V Q |                                             |
| AsUGT74H5   | 398 | L E R C I R E V T | ----              | G D D                     | --K Y A C N A L D | ----                    | W K E K S K R A M S     | -Q-G-                   | G S S D M N I T E F L Q                     |
| BdUGT74J7   | 417 | V E R C I R E V L | --D G E R K E     | --E Y R K N A A R         | ----              | W M K K A K E A M Q     | -E-G-                   | G S S D K N I A E F A A |                                             |
| SrUGT74G1   | 409 | L A S C I K M I M | --E E E R G V     | --I I R K N A V K         | ----              | W K D L A K V A V H     | -E-G-                   | G S S D N D I V E F V S |                                             |
| AtUGT74B1   | 410 | L V R C L K G V M | --E G E S S V     | --K I R E S S K K         | ----              | W K D L A V K A M S     | -E-G-                   | G S S D R S I N E F I E |                                             |
| RsUGT74R1   | 401 | L E K C V R A V L | --E G E K G E     | --V V R R N A G K         | ----              | I K R W A L E A V Q L G | ----                    | G S S D N N I A K F V T |                                             |
| LuUGT74S1   | 412 | I E R C I R E V M | ----              | E G E                     | --E T R R N A D K | ----                    | W G K I I K E A V V     | -E-G-                   | G S S D K N T E D F A T                     |
| AtUGT74F1   | 398 | I E F S I K E V M | --E G E K S K     | --E M K E N A G K         | ----              | W R D L A V K S L S     | -E-G-                   | G S T D I N I N E F V S |                                             |
| SgUGT74AC1  | 403 | V R S C I W E V M | --E G E R A S     | --E F K S N S M E         | ----              | W K K W A K E A V D     | -E-G-                   | G S S D K N I E E F V A |                                             |
| AtUGT74C1   | 408 | I A R C I V E V M | --E G E R G K     | --E I R K N V E K         | ----              | L K V L A R E A I S     | -E-G-                   | G S S D K K I D E F V A |                                             |
| AtUGT74D1   | 404 | I V R C V G E V M | --E D M S E K G K | --E I R K N A R R         | ----              | L M E F A R E A L S     | -D-G-                   | G N S D K N I D E F V A |                                             |
| AtUGT74E2   | 404 | I V R T V G E V M | --E G E K G K     | --E I R K N A E K         | ----              | W K V L A Q E A V S     | -E-G-                   | G S S D K S I N E F V S |                                             |
| AtUGT84B1   | 405 | V E R C I E A V T | --E G P A A V     | --D I R R R A A E         | ----              | L K R V A R L A L A     | -P-G-                   | G S S T R N L D L F I S |                                             |
| DgPHBAGT    | 421 | V A N C I V E V T | --K G P K A E     | --E F K K N A L K         | ----              | W K K A A D D A A R     | -E-G-                   | G T S Y N N L D K F V M |                                             |
| MtUGT84F1   | 405 | L K K C L L E V T | --T G E K A E     | --T L K K N A T K         | ----              | L K K A E E E A V A     | -V-G-                   | G S S D R H L D A F M E |                                             |
| GtUF6CGT1   | 422 | V E R A L R E I T | --S G P K A E     | --E V K E N A L K         | ----              | W K K A E E T V A       | -K-G-                   | G Y S E R N L V G F I E |                                             |
| PgUGT84A23  | 417 | V E Q C L R E A T | --Q G P K A A     | --E M K N A L K           | ----              | W K A A A E A S F V     | -E-G-                   | G S S D R N L Q A F V D |                                             |
| PgUGT84A24  | 416 | V E K C L L E A T | --V G P K A A     | --E V K E N A L K         | ----              | W K A A A E A A V A     | -E-G-                   | G S S D R N I Q A F V D |                                             |
| AtUGT76E1   | 399 | V E R A V E R L I | --M D E E G A     | --E M R K R V I N         | ----              | L K E K L Q A S V K S R | ----                    | G S S F S S L D N F V N |                                             |
| AtUGT76D1   | 397 | V E M A V R R L I | --V D Q E G Q     | --E M R M R A T I         | ----              | L K E E V E A S V T T E | ----                    | G S S H N S L N N L V H |                                             |
| SrUGT76G1   | 407 | I A N A I R R V M | --V D E E G E     | --Y I R Q N A R V         | ----              | L K Q K A D V S L M     | -K-G-                   | G S S Y E S L E S L V S |                                             |
| VvGT15      | 431 | I E R A V R R L M | --V D G E G E     | --E M R Q R A M E         | ----              | L K E K V D I C T S     | -E-G-                   | G S S N R A L K E L V E |                                             |
| AtUGT76C1   | 406 | I E R A V I R L M | --V E S K G E     | --E I R G R I K V         | ----              | L R D E V R R S V K     | -Q-G-                   | G S S Y R S L D E L V D |                                             |
| AtUGT76B1   | 396 | I E N A V R T L M | --T S S E G E     | --E I R K R I M P         | ----              | M K E T V E Q C L K     | -L-G-                   | G S S F R N L E N L I A |                                             |
| CsUGT76F1   | 398 | I E K T I R R V M | --V E K Q G E     | --E I R S R I F R         | ----              | L K E K A N H S W K     | -Q-G-                   | R S S F E S I N S L V T |                                             |
| OsUGT709A4  | 424 | V A R M V R E A M | ----              | E S G                     | --E I R A T A Q A | ----                    | L A E K V R R D V A     | -D-G-                   | G S S A T E F K R L V G                     |
| SrUGT85C2   | 428 | V K R L V Q E L M | --G E G G H       | --K M R N K A K D         | ----              | W K E K A R I A I A P N | ----                    | G S S S L N I D K M V K |                                             |
| CoUGT85N1   | 426 | I G M M V K E L M | --K G E K G L     | --E M R N K V E D         | ----              | L M S K A I K A T T     | -P-G-                   | G S S H T N F E M L M E |                                             |
| MeUGT85K4   | 428 | L V S I K E M M   | --E T E I G R     | --E R R R R A V E         | ----              | W R K K A E E A I S     | -V-G-                   | G V S Y N N F D T F I K |                                             |
| AtUGT85A1   | 432 | V E A V V R E L M | --D G E K G K     | --K M R E K A V E         | ----              | W Q R L A E K A T E     | --HKL                   | G S S V M N F E T V V S |                                             |
| MtUGT85H2   | 429 | L A K L I N E V I | --A G D K G K     | --K M K Q K A M E         | ----              | L K K K A E E N T R     | -P-G-                   | G C S Y M N L N K V I K |                                             |
| MdUGT71K1   | 427 | I E K A V V G V M | ----              | E K D S                   | --E V R K K V E E | ----                    | M G K M A R K A V K     | -D-G-                   | G S S F A S V G R F I E                     |
| AtUGT89A2   | 414 | L G R V I A E T M | --G E G G R       | --E V A A R A E E         | ----              | I R R K T E A A V T     | -E A N                  | G S S V E N V Q R L V K |                                             |
| AtUGT89C1   | 387 | L A R I L A E S A | --R E D L P E     | --R V T L M K             | ----              | L R E K A M E A I K     | -E-G-                   | G S S Y K N L D E L V A |                                             |
| AtUGT89B1   | 420 | L A R V F A D S V | --T G N Q T E     | --R I K A V E             | ----              | L R K A A L D A I Q E R | ----                    | G S S V N D L D G F I Q |                                             |
| NmUGT89P1   | 409 | L A N V L A E S I | --N G G R A E     | --R E R V T E             | ----              | L C D A A L K A V Q     | -S G N                  | G S S A K D L D S L T N |                                             |
| AtUGT92A1   | 430 | I V S K I K L V M | --E E T E V G K   | --E I R K K A R E         | ----              | V K E L V R R A M V     | -D-GVK                  | G S S V I G L E E F L D |                                             |
| GbUGT92K1   | 436 | V E R I V K M L F | -DGH              | D E K G I                 | --E L R K R A M D | ----                    | L K A A A T I A V S S T | ----                    | G S S I T H L D D F I Q                     |
| GmUGT92G4   | 432 | V K K T I E I V M | -D-Y E G K G K    | --V M K E K A N E I A A Y | ----              | I R E A K T E K G K E K | ----                    | G S S V R A M D D L V T |                                             |
| PoUGT90A7   | 414 | L K K M V K E L M | --E G E N G K     | --E V W K K V K E         | ----              | V G E A A K V A M A     | -E-G-                   | G S S W R T L N E L I D |                                             |
| AtUGT90A1   | 418 | L S G K I K E L M | --E G E T G K     | --T A R K N V K E         | ----              | Y S K M A K A A L V     | -E G T                  | G S S W K N L D M I L K |                                             |
| AcUGT73J1   | 417 | I A G V V G R V M | --G G E K Y E     | --E M K R K A K D         | ----              | Y G E K A K K A V D     | -E-G-                   | G S S Y N D V V A L I E |                                             |
| MtUGT73P1   | 437 | I G K A I G L L M | -G-G G E E C L    | --E M R K R V K A         | ----              | L S G A A K K A I E     | -V-G-                   | G S S Y T K L K E L I E |                                             |
| SrUGT73E1   | 438 | V K K A V E C L M | --D E D E D G D   | --Q R R K R V I E         | ----              | L A K M A K I A M A     | -E-G-                   | G S S Y E N V S S L I R |                                             |
| CpPGT4      | 431 | V K T A I N I L M | --D D G E E R     | --N A R S A R E           | ----              | F G E L A K R A I D     | -E-G-                   | G S S Y N N V E L F M Q |                                             |
| AtUGT73C1   | 434 | V K K A V E E L M | --G D S N D A K   | --E R R K R V K E         | ----              | L G E L A H K A V E     | -E-G-                   | G S S H S N I T F L L Q |                                             |
| CpPGT2      | 431 | V R N A V E K L M | --D E G K E G E   | --E R R N R A V K         | ----              | L Q M A N M A V Q E     | -E-G-                   | G S S H L N V T L V I Q |                                             |
| PjGAT       | 439 | I Q K A I E T I M | --N G G E E G G   | --I R K R A T K           | ----              | L S K V G A R A M E     | -D-G-                   | G S S H F N I S L L I Q |                                             |
| CtiUGT73AE1 | 435 | V S N A I Q K A M | --D V G N E G N   | --E R R R K V K A         | ----              | L G K V A E N A I E     | -E-G-                   | G S S Y K N L T L L I K |                                             |
| CaUGT73AH1  | 441 | V K N A V E C I M | --S E D E E G E   | --Y R R N R A K K         | ----              | L A E M A V K A V E     | -E-G-                   | G S S N L N M T L L I Q |                                             |
| PzGAT2      | 436 | V K E A I E C I M | --L E G K E G Q   | --E R R K R A R E         | ----              | L A K E A V R A V E     | -E-G-                   | G S S H L N I T L L I E |                                             |
| AcUGT73G1   | 421 | I E T A V K K L M | --G D D E E A E   | --E R R R R A K E         | ----              | L A A M A R K A V E     | -E-G-                   | G S S Y E L M S D L I R |                                             |
| MtUGT73K1   | 423 | I E K A V K K L M | --D S N G E G G   | --E I R K R A K E         | ----              | M K E K A W K A V Q     | -E-G-                   | G S S Q N C L T K L V D |                                             |
| GeUGT73F1   | 423 | I E K A V R R L M | --D G G D E A E   | --K I R R R A R E         | ----              | F R D K A T R A V Q     | -E-G-                   | G S S H N N L T A L I D |                                             |
| AtUGT73B1   | 433 | V E G A V R E V M | ----              | V G E                     | --E R R K R A K E | ----                    | L A E M A K N A V K     | -E-G-                   | G S S D L E V D R L M E                     |
| GuUGAT      | 428 | I E Q A V R R I M | --V G Q E A E     | --E M R N R A K E         | ----              | L S Q M A K R A V E     | -E-G-                   | G S S H N D F N S L I E |                                             |
| NmUGT73BD1  | 412 | V S D A V K R V M | --E G E E A I     | --E M R T R A K S         | ----              | L K K M A C K A V E     | -E-G-                   | G S S Y N D L T S L I D |                                             |
| NmUGT73BD1  | 1   | -----             | -----             | -----                     | -----             | -----                   | -----                   | -----                   | M T A Q F H V V F F P - L M - A Q G H L I P |

|             |     |    |                                 |
|-------------|-----|----|---------------------------------|
| AtUGT81A1   | 522 | KK | -----NSLPQLSCTA-----            |
| AtUGT80A2   | 636 | FS | -----                           |
| AtUGT80B1   | 599 | WF | -----FIQIGKKCCLPCGGV-----       |
| OsZOGT3     | 461 | HI | -----TR-----                    |
| OsZOGT1     | 460 | YI | -----TR-----                    |
| ZmcisZOG1   | 464 | YI | -----TR-----                    |
| GmUGT79A6   | 459 | QL | -----KSMA-----                  |
| AtUGT79B6   | 442 | AL | -----EKLQVNINLE-----            |
| GmUGT91H9   | 453 | AL | -----QKYKTPNSNC-----            |
| ZmUGT91L1   | 421 | SL | -----RTYKN-----                 |
| PoUGT95A1   | 539 | FI | -----SQKAT-----                 |
| MtUGT95B4   | 480 | FI | -----KQRFV-----                 |
| PgUGT95B2   | 512 | FI | -----RQKTK-----                 |
| VvUGT95B6   | 503 | FI | -----NQRAP-----                 |
| AtUGT82A1   | 459 | EL | -----N-----                     |
| VpUGT94F1   | 442 | LC | -----AKNKLQKCD-----             |
| AtUGT87A1   | 435 | DI | -----TKIV-----                  |
| AtUGT72C1   | 454 | AY | -----FT-----                    |
| AtUGT72D1   | 465 | RC | -----YLVP-----                  |
| LjUGT72AD1  | 471 | KW | -----KRLAVEGEGN-----            |
| AtUGT72B1   | 448 | KW | -----KAHKKELEQNGNH-----         |
| VvUGT1      | 462 | IW | -----KNIKV-----                 |
| LjUGT72AH1  | 464 | KW | -----KSLGTITQD-----             |
| LjUGT72Z2   | 481 | QI | -----ENFLALK-----               |
| GmUGT72X4   | 461 | QW | -----ECFSGNC-----               |
| MtUGT72L1   | 472 | KW | -----RNLVQKNQI-----             |
| PgUGT72BD1  | 476 | EC | -----KIGLVGLKQRARGA-----        |
| AtUGT72E1   | 463 | ES | -----EHLLEVRRCMARGA-----        |
| OsUGT706C1  | 457 | NL | -----GTNNVKSGPRDTPVHD-----      |
| OsUGT706D1  | 466 | RL | -----VTSE-----                  |
| MtUGT88E1   | 460 | SW | -----REHASWTSVSPNSPFLFA-----    |
| VpUGT88D8   | 451 | LV | -----IG-----                    |
| NmUGT88P1   | 472 | GW | -----K-----                     |
| AtUGT88A1   | 458 | SW | -----SPK-----                   |
| VvGT7       | 475 | SW | -----RPG-----                   |
| MdUGT88F1   | 481 | SI | -----T-----                     |
| ScUGT5      | 471 | VW | -----FGN-----                   |
| OsUGT707A2  | 483 | EM | -----AHMSSI-----                |
| AtUGT71B1   | 467 | DV | -----VDNVP-----                 |
| MdUGT71A15  | 470 | KI | -----                           |
| BvUGT71F1   | 487 | DV | -----LTFE-----                  |
| Db6-GT      | 474 | DL | -----LENAGF-----                |
| AtUGT71C1   | 472 | DL | -----IDGVSISK-----              |
| AtUGT71C4   | 471 | EL | -----FEDGSSC-----               |
| AtUGT71D1   | 461 | DV | -----IGIKP-----                 |
| FaUGT71W2   | 467 | VL | -----SQNLENN-----               |
| MtUGT71G1   | 460 | DI | -----TGSN-----                  |
| MdUGT71K1   | 472 | DV | -----IGQN-----                  |
| AtUGT89A2   | 461 | EF | -----EKV-----                   |
| AtUGT89C1   | 432 | EM | -----CL-----                    |
| AtUGT89B1   | 465 | HV | -----VSLGLNK-----               |
| NmUGT89P1   | 455 | QL | -----NGLKVKIN-----              |
| AtUGT92A1   | 480 | QA | -----MVKKVEN-----               |
| GbUGT92K1   | 485 | KL | -----KYSKGMENQG-----            |
| GmUGT92G4   | 484 | TI | -----LSPKVL-----                |
| PoUGT90A7   | 461 | EL | -----QSVRN-----                 |
| AtUGT90A1   | 466 | EL | -----CKSRDSNGASE-----           |
| AcUGT73J1   | 465 | EL | -----KTL-----                   |
| MtUGT73P1   | 485 | EL | -----KSFKLEKINKKLVSVT-----      |
| SrUGT73E1   | 486 | DV | -----TETVRAPH-----              |
| CpPGT4      | 478 | DI | -----MQQPSSEVI-----             |
| AtUGT73C1   | 482 | DI | -----MQLEQPKK-----              |
| CpPGT2      | 479 | DI | -----MKHVHSSSQAN-----           |
| PjGAT       | 487 | DI | -----WKQKNNQEKL-----            |
| CtiUGT73AE1 | 483 | DI | -----RELAKD-----                |
| CaUGT73AH1  | 489 | DI | -----IEQVKDRLALS-----           |
| PzGAT2      | 484 | DI | -----M-----                     |
| AcUGT73G1   | 469 | EL | -----EGLRDRRNK-----             |
| MtUGT73K1   | 471 | YL | -----HSVVVTKSVELN-----          |
| GeUGT73F1   | 471 | DL | -----RRLRDRKVLD-----            |
| AtUGT73B1   | 477 | EL | -----TLVKLQKEKV-----            |
| GuUGAT      | 475 | DL | -----RSRAH-----                 |
| NmUGT73BD1  | 459 | GV | -----KAYRSQSSEAEHEHN-----       |
| NmUGT73BD1  | 1   |    | -----MTAQFHVVFFP-LM-AQGHLP----- |

|             |     |    |                                                              |
|-------------|-----|----|--------------------------------------------------------------|
| NtTOGT1     | 467 | DI | -----STYSSTGH-----                                           |
| BvUGT73A4   | 470 | EL | -----RGLST-----                                              |
| Db5-GT      | 479 | EL | -----KGYHTSEKE-----                                          |
| AtUGT86A1   | 469 | EV | -----RNRIETKLCNVNGLEISPSN-----                               |
| ZmUFGT1     | 467 | IV | -----CRA-----                                                |
| CteUGT78K6  | 442 | VI | -----SSS-----                                                |
| AtUGT78D1   | 449 | EI | -----VKV-----                                                |
| CoUGT78B3   | 450 | IV | -----TARN-----                                               |
| MtUGT78G1   | 451 | IV | -----TS-----                                                 |
| LgUGT78J1   | 441 | II | -----CI-----                                                 |
| CpPGT11     | 451 | SI | -----KQWPA-----                                              |
| AtUGT83A1   | 458 | WI | -----KSQVN-----                                              |
| FaUGT75T1   | 452 | SL | -----A-----                                                  |
| AtUGT75C1   | 454 | ED | -----E-----                                                  |
| AtUGT75B1   | 450 | DI | CGESLIQNLCEAEEVKVK-----                                      |
| AtUGT75D1   | 472 | EH | -----M-----                                                  |
| ZmUGT74A1   | 463 | FV | -----RAGATEK-----                                            |
| AsUGT74H5   | 442 | AL | -----RRSRKSYEAKPIEPLLVGLDA-----                              |
| BdUGT74J7   | 464 | KY | -----ASS-----                                                |
| SrUGT74G1   | 456 | EL | -----IKA-----                                                |
| AtUGT74B1   | 457 | SL | -----GK-----                                                 |
| RsUGT74R1   | 448 | GL | -----ALKD-----                                               |
| LuUGT74S1   | 456 | SL | -----INFAETFQFSC-----                                        |
| AtUGT74F1   | 445 | KI | -----QIK-----                                                |
| SgUGT74AC1  | 450 | ML | -----KQT-----                                                |
| AtUGT74C1   | 455 | LL | -----T-----                                                  |
| AtUGT74D1   | 453 | KI | -----VR-----                                                 |
| AtUGT74E2   | 451 | MF | -----C-----                                                  |
| AtUGT84B1   | 452 | DI | -----TIA-----                                                |
| DgphBAGT    | 468 | EV | -----QALKQGLCTSEEDPHQS-----                                  |
| MtUGT84F1   | 452 | DI | -----KKHKRC-----                                             |
| GtUF6CGT1   | 469 | EV | -----ARKTGTK-----                                            |
| PgUGT84A23  | 464 | EV | -----KRRSIEITASKPAVKAAPNGVVAAAESVVETKANGKVELAA-----          |
| PgUGT84A24  | 463 | EV | -----KRRSIAIQSNKSEPKPVVQNAAVADHFGAKATTNGVAADLAGSNADGKVE----- |
| AtUGT76E1   | 446 | SL | -----KMMNFM-----                                             |
| AtUGT76D1   | 444 | AI | -----MMQIDEQ-----                                            |
| SrUGT76G1   | 454 | YI | -----SSL-----                                                |
| VvGT15      | 478 | YI | -----SSF-----                                                |
| AtUGT76C1   | 453 | RI | -----SIIIEPLVPT-----                                         |
| AtUGT76B1   | 443 | YI | -----LSF-----                                                |
| CsUGT76F1   | 445 | HI | -----LSLETFTFHTQ-----                                        |
| OsUGT709A4  | 468 | FL | -----QELATRIQHAN-----                                        |
| SrUGT85C2   | 474 | EI | -----TVLARN-----                                             |
| CoUGT85N1   | 473 | DV | -----AKW-----                                                |
| MeUGT85K4   | 475 | EV | -----ILQQQTQ-----                                            |
| AtUGT85A1   | 480 | KF | -----LLGQKSQD-----                                           |
| MtUGT85H2   | 476 | DV | -----LLKQN-----                                              |
| MdUGT71K1   | 472 | DV | -----IGQN-----                                               |
| AtUGT89A2   | 461 | EF | -----EKV-----                                                |
| AtUGT89C1   | 432 | EM | -----CL-----                                                 |
| AtUGT89B1   | 465 | HV | -----VSLGLNK-----                                            |
| NmUGT89P1   | 455 | QL | -----NGLKVKIN-----                                           |
| AtUGT92A1   | 480 | QA | -----MVKKVEN-----                                            |
| GbUGT92K1   | 485 | KL | -----KYSKGMENQG-----                                         |
| GmUGT92G4   | 484 | TI | -----LSPKVL-----                                             |
| PoUGT90A7   | 461 | EL | -----QSVRN-----                                              |
| AtUGT90A1   | 466 | EL | -----CKSRDSNGASE-----                                        |
| AcUGT73J1   | 465 | EL | -----KTL-----                                                |
| MtUGT73P1   | 485 | EL | -----KSFKLEKINKKLVSVT-----                                   |
| SrUGT73E1   | 486 | DV | -----TETVRAPH-----                                           |
| CpPGT4      | 478 | DI | -----MQQPSSEVI-----                                          |
| AtUGT73C1   | 482 | DI | -----MQLEQPKK-----                                           |
| CpPGT2      | 479 | DI | -----MKHVHSSSQAN-----                                        |
| PjGAT       | 487 | DI | -----WKQKNNQEKL-----                                         |
| CtiUGT73AE1 | 483 | DI | -----RELAKDH-----                                            |
| CaUGT73AH1  | 489 | DI | -----IEQVKDRLALS-----                                        |
| PzGAT2      | 484 | DI | -----M-----                                                  |
| AcUGT73G1   | 469 | EL | -----EGLRDRRNK-----                                          |
| MtUGT73K1   | 471 | YL | -----HSVVVTKSVELN-----                                       |
| GeUGT73F1   | 471 | DL | -----RRLRDRKVLD-----                                         |
| AtUGT73B1   | 477 | EL | -----TLVKLQKEKV-----                                         |
| GuUGAT      | 475 | DL | -----RSRAH-----                                              |
| NmUGT73BD1  | 459 | GV | -----KAYRSQSSEAEHEHN-----                                    |
| NmUGT73BD1  | 1   |    | -----MTAQFHVVFFP-LM-AQGHLP-----                              |

|             |                                                              |
|-------------|--------------------------------------------------------------|
| AtUGT81A1   | -----STYSSTGH-----                                           |
| AtUGT80A2   | -----RGLST-----                                              |
| AtUGT80B1   | -----KGYHTSEKE-----                                          |
| OsZOGT3     | -----RNRIETKLCNVNGLEISPSN-----                               |
| OsZOGT1     | -----CRA-----                                                |
| ZmcisZOG1   | -----SSS-----                                                |
| GmUGT79A6   | -----VKV-----                                                |
| AtUGT79B6   | -----TARN-----                                               |
| GmUGT91H9   | -----TS-----                                                 |
| ZmUGT91L1   | -----CI-----                                                 |
| PoUGT95A1   | -----KQWPA-----                                              |
| MtUGT95B4   | -----KSQVN-----                                              |
| PgUGT95B2   | -----A-----                                                  |
| VvUGT95B6   | -----E-----                                                  |
| AtUGT82A1   | ---GESLIQNLCEAEEVKVK---                                      |
| VpUGT94F1   | -----M-----                                                  |
| AtUGT87A1   | -----RAGATEK-----                                            |
| AtUGT72C1   | -----RRSRKSYEAKPIEPLLVGLDA-----                              |
| AtUGT72D1   | -----ASS-----                                                |
| LjUGT72AD1  | -----IKA-----                                                |
| AtUGT72B1   | -----GK-----                                                 |
| VvUGT1      | -----ALKD-----                                               |
| LjUGT72AH1  | -----INFAETTFQFSC-----                                       |
| LjUGT72Z2   | -----QIK-----                                                |
| GmUGT72X4   | -----KQT-----                                                |
| MtUGT72L1   | -----T-----                                                  |
| PgUGT72BD1  | -----VR-----                                                 |
| AtUGT72E1   | -----C-----                                                  |
| OsUGT706C1  | -----TIA-----                                                |
| OsUGT706D1  | -----QALKQGLCTSEEDPHQS-----                                  |
| MtUGT88E1   | -----KKHKRC-----                                             |
| VpUGT88D8   | -----ARKTGTK-----                                            |
| NmUGT88P1   | -----KRRSIEITASKPAVKAAPNGVVAAAESVVETKANGKVELAA-----          |
| AtUGT88A1   | -----KRRSIAIQSNKSEPKPVVQNAAVADHFGAKATTNGVAADLAGSNADGKVE----- |
| VvGT7       | -----KMMNFM-----                                             |
| MdUGT88F1   | -----MMQIDEQ-----                                            |
| ScUGT5      | -----SSL-----                                                |
| OsUGT707A2  | -----SSF-----                                                |
| AtUGT71B1   | -----SIIIEPLVPT-----                                         |
| MdUGT71A15  | -----LSF-----                                                |
| BvUGT71F1   | -----LSLETFTFHTQ-----                                        |
| Db6-GT      | -----QELATRIQHAN-----                                        |
| AtUGT71C1   | -----TVLARN-----                                             |
| AtUGT71C4   | -----AKW-----                                                |
| AtUGT71D1   | -----ILQQQTQ-----                                            |
| FaUGT71W2   | -----LLGQKSQD-----                                           |
| MtUGT71G1   | -----LLKQN-----                                              |
| MdUGT71K1   | -----IGQN-----                                               |
| AtUGT89A2   | -----EKV-----                                                |
| AtUGT89C1   | -----CL-----                                                 |
| AtUGT89B1   | -----VSLGLNK-----                                            |
| NmUGT89P1   | -----NGLKVKIN-----                                           |
| AtUGT92A1   | -----MVKKVEN-----                                            |
| GbUGT92K1   | -----KYSKGMENQG-----                                         |
| GmUGT92G4   | -----LSPKVL-----                                             |
| PoUGT90A7   | -----QSVRN-----                                              |
| AtUGT90A1   | -----CKSRDSNGASE-----                                        |
| AcUGT73J1   | -----KTL-----                                                |
| MtUGT73P1   | -----KSFKLEKINKKLVSVT-----                                   |
| SrUGT73E1   | -----TETVRAPH-----                                           |
| CpPGT4      | -----MQQPSSEVI-----                                          |
| AtUGT73C1   | -----MQLEQPKK-----                                           |
| CpPGT2      | -----MKHVHSSSQAN-----                                        |
| PjGAT       | -----WKQKNNQEKL-----                                         |
| CtiUGT73AE1 | -----RELAKDH-----                                            |
| CaUGT73AH1  | -----IEQVKDRLALS-----                                        |
| PzGAT2      | -----M-----                                                  |
| AcUGT73G1   | -----EGLRDRRNK-----                                          |
| MtUGT73K1   | -----HSVVVTKSVELN-----                                       |
| GeUGT73F1   | -----RRLRDRKVLD-----                                         |
| AtUGT73B1   | -----TLVKLQKEKV-----                                         |
| GuUGAT      | -----RSRAH-----                                              |
| NmUGT73BD1  | -----KAYRSQSSEAEHEHN-----                                    |
| NmUGT73BD1  | -----MTAQFHVVFFP-LM-AQGHLP-----                              |
